# Supplementary material for: The link between lymphocyte subpopulations in peripheral blood and metabolic variables in patients with severe obesity
Source: PeerJ. 2023 Jun 13;11:e15465. doi: 10.7717/peerj.15465 (PMC10274585; doi:10.7717/peerj.15465)
Supplement: Data S1 [file peerj-11-15465-s001.xlsx]

## Sheet: DATOS GENERALES
Age (years)	Height (m)	Weight (kg)	BMI (kg/m2)	WC (cm)	sex 0=male, 1=female	TBF (%)	TBF diagnosis. 0= normopeso 2=obesidad grado 1 y 2, 3=obesidad grado 3, 4= obesida grado 4, 5 y 6	FFM (kg)	FFM (%)	VF (cm2)	Glucose (mg/dL)	Total cholesterol (mg/dL)	HDL-c (mg/dL)	LDL-c (mg/dL)	Triglycerides (mg/dL)	HbA1c (mg/dL)	Insulin (µUI/mL)	CRP (mg/dL)	SBP (mmHg)	DBP (mmHg)	Total lymphocytes (%)	Monocytes (%)	Granulocytes (%)	TCD3+ lymphocytes (%)	NK lymphocytes (%)	NKT lymphocytes (%)	B lymphocytes (%)	TCD3+ lymphocytes (%) (para cd62)	TCD4+ lymphocytes (%) (para cd62)	TCD4+CD62+ lymphocytes (%)	TCD4+CD62- lymphocytes (%)	TCD3+ lymphocytes (%) (para cd28)	TCD8+ lymphocytes (%)	TCD8+CD28+ lymphocytes (%)	TCD8+CD28- lymphocytes (%)	TCD3+ lymphocytes (%) (para raro cd4)	TCD4+ lymphocytes (%) (para raro cd4)	TCD4+CD45RA+ lymphocytes (%)	TCD4+CD45RA+CD45RO+ lymphocytes (%)	TCD4+CD45RO+ lymphocytes (%)	TCD3+ lymphocytes (%) (para raro cd8)	TCD8+ lymphocytes (%) (para raro cd8)	TCD8+CD45RA+ lymphocytes (%)	TCD8+CD45RA+CD45RO+ lymphocytes (%)	TCD8+CD45RO+ lymphocytes (%)	Leukocytes (cel/µL)	Total lymphocytes (cel/µL)	Monocytes (cel/µL)	Granulocytes (cel/µL)
25	1.59	51.1	20.2128	70.3	1	26.9	0	37.3541	73.1	43	80	133	50	64	97	5.9	10.53	0.077	104	78	7.5	1.9	81.7	12.5714	29.7143	1.71429	2.3	27.7	56.1	52.2	26.1	31.7	58.4	63.5	25	42.3	46.4	6.5	10.5	72.6	46.3	29.2	22.3	14.9	46.8	5800	435	110.2	4738.6
35	1.52	45	19.4771	65.7	1	17.9	0	36.945	82.1	43	71	171	80	70	109	5.3	3.9	0.03533	128	85	15.632	6.17638	78.1917	48.0101	31.0171	4.35881	16.614	52.7	53.4	83.7	16.7	47.2	72.3	22.1	38.7	53.4	53.3	14.5	8.2	56.6	50.8	26.6	31.2	38.7	28.5	4600	719.07	284.113	3596.82
24	1.63	61.6	23.1849	83	0	19.4	0	49.6496	80.6	82	78	165	41	107	79	5.7	7.46	0.191	114	69	11.5518	6.5703	81.8779	54.8339	24.8708	0.0738007	20.2214	50.5	61.8	92.8	7.2	50.6	87.1	21.9	76.5	58.6	61.8	34	8.8	56.6	53.3	32.3	56.2	14.8	29	5900	681.555	387.648	4830.8
31	1.75	76.3	24.9143	88.7	0	22.1	0	59.4377	77.9	108	75	113	33	60	100	5.4	7.01	0.731	124	86	18.5143	7.63359	73.8521	43.4136	40.7483	2.6653	13.1727	46.2	45.8	93.3	6.9	40.6	79.2	33.5	65.2	49.5	47.7	26.4	15.7	58.5	49.8	41.5	56.8	7.8	33.1	4100	759.086	312.977	3027.94
35	1.78	68.8	21.7144	81.6	0	17.1	0	57.0352	82.9	95	82	169	64	89	80	5.5	4.65	0.024	119	88	21.3994	8.4669	70.1337	42.2588	43.3412	4.28235	10.1176	44.5	44.5	90.5	9.8	47.5	65.4	32.7	66.9	46.7	43.7	6.5	11.4	79.6	46.9	48.5	34	18.5	46.8	4500	962.971	381.01	3156.02
24	1.56	46.2	18.9842	68.2	1	27.8	0	33.3564	72.2	82	78	147	55	74	91	5.4	3.88	0.05	107	68	21.555	8.57047	69.8745	57.7925	25.0894	2.91262	14.2054	54.3	47.8	82.4	16.7	51.6	64.9	22.8	76.9	60.1	51.8	32	11.8	53.5	57.8	33.1	59.9	17.2	21.4	5800	1250.19	497.087	4052.72
29	1.66	65.1	23.6246	79.8	1	29.3	0	46.0257	70.7	69	80	141	49	68	120	5.2	4.86	0.461	97	73	26.2364	6.83971	66.9239	58.7679	25.5215	1.59713	14.1134	56.5	61.9	91.8	8.2	51.7	87.1	21.6	16.4	66.5	64.3	46.5	8.3	44.9	58.8	28.4	46.8	33.5	17.7	6400	1679.13	437.741	4283.13
27	1.58	48	19.2277	69.8	0	14.7	0	40.944	85.3	56	91	175	57	91	138	5.6	6.64	0.111	110	74	31.4927	4.63762	63.8697	54.803	27.8411	5.01465	12.3413	56.7	51.5	95.4	3.9	56.5	64.3	36.4	62.8	54.3	52.5	32	13.5	52.4	56.4	39.1	54.9	11.1	33.3	7100	2235.98	329.271	4534.75
24	1.62	60.4	23.0148	81	1	26.5	0	44.394	73.5	56	82	160	86	66	36	5.3	2.62	0.092	110	55	24.4178	8.02623	67.556	65.4477	18.9155	5.42245	10.2144	61.8	46.2	60.3	40.3	55.7	33.8	64.6	14.1	63.5	47.2	22.4	8.6	69	58.7	36.3	39.9	12	48.1	5000	1220.89	401.311	3377.8
26	1.78	83.4	26.3224	92	0	24	0	63.384	76	108	89	214	39	77	150	5.5	6.69	0.27	113	76	30.787	6.37691	62.8361	44.5937	30.1545	10.1746	15.0772	57.3	43.6	88.4	12.3	55	63.2	27	72.2	56.3	43.1	34	5.5	60	52.9	48.9	60.6	16	23	7000	2155.09	446.383	4398.53
25	1.65	77.2	28.3563	83	0	22.7	0	59.6756	77.3	108	76	225	60	131	169	4.9	8.14	0.076	117	77	10.6201	8.82632	80.5536	41.6461	33.3333	3.53909	21.4815	42.1	41.2	85.1	14.9	40.8	67.3	30.5	69.5	45.2	48.3	8.2	11.7	79.7	43.8	36.8	59	0	39.8	5500	584.105	485.448	4430.45
30	1.7	64.8	22.4221	82	0	24.1	0	49.1832	75.9	108	80	214	44	136	170	5.6	4.75	0.171	104	65	15.0871	7.4983	77.4146	59.6669	14.1582	9.7561	16.4188	72	30.5	84.7	15.6	69.9	59.8	35.5	63.5	72.5	55.7	57.3	12.7	29.5	74.1	31.8	57.3	9.1	29.5	6900	1041.01	517.383	5341.61
25	1.71	68.8	23.5286	83	0	17.1	0	57.0352	82.9	69	83	137	54	58	123	5.2	7.5	0.018	104	77	27.0963	9.67888	63.2248	50.4784	30.6162	1.18638	17.7191	53	51.6	87.2	13.8	50.2	79.6	23.5	75.5	53.6	51.7	14	7	77.9	55	30.3	46	16.8	36.2	3700	1002.56	358.119	2339.32
30	1.72	70.6	23.8643	87	0	20.9	0	55.8446	79.1	95	86	209	47	123	194	5.3	4.84	0.343	107	73	14.4569	9.75154	75.7916	61.9891	12.6703	10.218	15.1226	70.9	43.1	83.2	17.7	68.3	55.2	26.8	73.2	72.7	48.9	12.2	8.5	79.1	74	46	37.7	15.4	46.5	8000	1156.55	780.123	6063.32
28	1.75	61.1	19.951	75.8	0	14.3	0	52.3627	85.7	56	80	165	52	93	94	5.3	3.55	0.02	120	70	23.7584	8.60179	67.6398	38.8707	32.9378	5.72831	22.4632	47.7	28.7	5.6	95.1	49.1	64.1	32.3	67.2	49.8	36.2	23.6	8.4	67.5	49.8	31	41.5	14	43.6	6600	1568.05	567.718	4464.23
32	1.51	46.8	20.5254	73.3	1	25.4	0	34.9128	74.6	56	89	163	64	79	98	5.5	6.84	0.075	90	60	37.2589	6.68461	56.0565	67.4711	22.4132	0	10.1157	63.2	66.1	79.8	20.6	61.8	28.2	89.4	9.7	64	66.7	20.5	16.3	62.1	59.6	21.5	39.6	24.5	34.8	5000	1862.94	334.231	2802.83
25	1.9	83	22.9917	73	0	19	0	67.23	81	69	93	145	35	88	106	5.3	6.38	0.051	120	70	32.6233	7.66381	59.7129	79.8418	14.8951	0	5	74.4	45.6	75.4	24.6	73.1	39.4	75.1	24.4	75	46.2	31.7	7.1	60.5	75.5	46.3	32.8	6.3	60.2	6000	1957.4	459.829	3582.77
26	1.83	88.9	26.546	99	0	22.9	0	68.5419	77.1	108	84.6	164.5	53	86	111				108	71	30.4229	9.07329	60.5038	63.0283	22.5277	5.4165	9.02749	62.8	57	73	29.8	63.2	25.7	80	5.7	65.5	58.5	22.4	13.4	64.7	66.1	28.1	33.1	26.6	27.7	5000	1521.14	453.665	3025.19
42	1.58	61.2	24.5153	84.5	0	22.1	0	47.6748	77.9	94.6	89.7	160.4	48.45	71.5	61.4				100	70	25.3	9.5	65.1	84	11		5		58	71.8	28.2		31.7	59.8	40.2		58					31.7
23	1.56	46.4	19.0664	69	1	27.1	0	33.8256	72.9	38.9	66.3	177.4	62.5	83.3	157.7				100	70	36.4	6.6	56.9	85.1	10.9		7.6		38.5	78.9	21.1		23.3	82	17.6		38.5
22	1.56	45.7	18.7788	69	1	29.4	0	32.2642	70.6	39	81.6	154.7	65.8	98.5	82.5				90	60	34.8	5.7	59.4	60.9	2.5		36.6		30	75.5	24.5		34	41.7	58.3
24	1.71	70.4	24.0758	88.7	0	21.8	0	55.0528	78.2	91.7	76.5	194	46.6	107.4	199.9				120	70	55.9	8.7	35.2	49	11.5		39.5		55	62.7	37.3		44.9	51	49
19	1.61	51	19.6752	69.5	1	25.1	0	38.199	74.9	37.7	80.5	151	44.6	99	100.1				80	60	53.4	5.1	41.4	66.2	7.4		27.2		58.7	81.4	18.6		15.8	70	25.5
20	1.79	61.8	19.2878	73.5	0	18	0	50.676	82	42.3	66.9	130.7	44.6	66.12	99.9				90	60	43.5	5.5	51	65	13.3		21.6		54.3	52	48		45.6	38.1	61.9
22	1.59	50.3	19.8964	67	1	29	0	35.713	71	41.8	79.2	138.5	49.9	82.8	52.5				100	63	29.1	6.5	64.2	72	7		20.8		57.8	72.4	27.6		29.8	57.5	42.5
42	1.58	61.2	24.5153	84.5	0	22.1	0	47.6748	77.9	94.6	89.7	160.4	48.45	71.5	61.4				100	70	25.3	9.5	65.1	84	5		11		58	71.8	28.2		31.7	59.8	40.2
31	1.5	71.2	31.6444	100.3	1	39	2	43.432	61	121	88	208	72	115	109	5.4	14.99	0.8	113	64	25.0854	4.90824	70.0064	81.0507	11.3039		7.6454	73	70.7	87.6	12.8		22.1	81.2	18.5	74.9	74.3	45.8	19.1	34.8	72.4	30.9	82.1	8.4	9.5	6800	1705.8	333.76	4760.44
56	1.65	80.4	29.5317	102	1	35.8	2	51.6168	64.2	199	120.4	200.4	60.7	123.5	91.1	6.5	9.42	0.145	130	80	31.2131	8.33815	60.4487	53.4483	35.2371	3.125	8.18966	50.5	45.8	48.4	51.9	49.4	53.7	58	42.9	51.2	31.1	55.6	9.9	34.5	48.7	21.4	50.4	27.5	22.1	8370	2612.54	697.903	5059.56
40	1.53	79.6	34.004	101.5	1	39	2	48.556	61	147	94	186	41	112	166	5.3	25.57	0.57	105	78	13.1809	6.22402	80.5951	69.4405	17.7188	2.94118	9.89957	71.7	64.1	48.5	51.6	69.7	25.7	66.9	33.1	66.7	62.2	73	7	20	68.8	24.3	40.2	5.2	54.6	6800	870.4	423.233	5011.6
37	1.78	159.1	50.2146	150	0	34	2	105.006	66	357	105	160	40	82	189	5.3	36.92	0.72	130	100	14.8061	8.46368	76.7302	52.1038	20.6171	10.3787	16.9004	69.2	66.4	51.1	50.2	67.9	28.6	54.7	45.3	66.1	65	29.7	7.1	63.2	64.9	31.2	16.9	13.2	69.9	7400	1021.2	626.312	5678.04
43	1.65	62.1	22.8099	82.7	1	30.2	2	43.3458	69.8	95	89	182	38.1	120.5	117				110	70	16.7	7.41457	69.5	69.954	26.132	1.95702	1.95702	49.6	56	39.9	27.7	49.7	28.3	50.4	16.3	53.6	57.9	21.6	14	64.4	46.8	23.3	30.5	26.7	42.9	4600	768.2	341.07	3197
41	1.83	106.8	31.8911	110	0	29.6	2	75.1872	70.4	199	392	239	35	121	405	14.5	13.3	0.966	112	82	27.4281	6.28376	66.2882	71.8332	6.68765	2.67506	18.8041	67.2	51.4	64	20.9	62.2	38	32	67.6	66.2	50.8	11.4	8.1	80.4	66.5	37.1	36.6	24.8	38.6	6600	1810.25	414.728	4375.02
30	1.71	82.4	28.1796	102.5	0	33.3	2	54.9608	66.7	125.4	77.3	198.6	49.6	92.7	128.3				110	86	35.8	8.3	55.7	32			53.2	69.7	52.4	42.1	57.6	69.7	37.9	45.1	54.9	69.7	65.8	16	17.8	67.4	69.7	37.9	42.2	21.4	39.9
33	1.72	83.4	28.1909	98	0	26.2	2	61.5492	73.8	114.2	90	202.8	44.8	129.9	140.3				90	60	49.3	11.3	39.2	76.1			9.5		55.31	57.7	42.3		44.68	66.7	33.3		55.31
28	1.6	76.3	29.8047	97.7	1	38.4	2	47.0008	61.6	108.6	71.4	141.4	52.1	33.9	276.9				110	60
33	1.64	72.6	26.9929	90	1	34.8	2	47.3352	65.2	105.6	85.3	142.3	43.9	87.8	207.7				110	70	37.8	4	58.2	63.3	28.2		8.3	59.4	53.1	42.9	26.3	59.4	35.9	70.9	29.1	59.4	65.1	34.5	23.1	42	59.4	35.9	50.7	13.7	36.1
38	1.69	85.4	29.9009	100.7	1	36.2	2	54.4852	63.8	128.5	73.5	182.4	39	120.6	113.7				120	80	26.1	7.5	66.3	79.7	13.8		6.35		50.6	64.4	35.6		20	71.4	28.6
33	1.65	73.2	26.8871	90.1	1	37	2	46.116	63	107.2	78.9	171.7	55	108.9	74.5				110	63	52.6	4.5	42.8	86.3	8.9		4.7		59.9	65	35		40	73.5	26.6	76.3	57.3	41.7	19.5	38.7			61.8	13.8	25.1
41	1.78	116.2	36.6747	118	0	34.4	2	76.2272	65.6	185.3	117.3	224	33.2	120.7	183.6				140	90	41	3.3	55.5	78.3	9.9		11.6	67.8	46.1	54.2	45.8	67.8	33.1	58.1	41.9	67.8	46.1	24	20.8	55.1	67.8	33.1	24	20.8	55.1
35	1.46	51.4	24.1133	88.7	1	37.6	2	32.0736	62.4	89.9	96.4	100.3	33.3	55.6	57				110	70	24.2	11.7	63.9	80.1	19.8		15.5	76	67.7			76	20.7	72.5	27.5	76	67.7	47.4	14.7	42.1	76	20.7	51.8	13.2	36.1
36	1.68	69.8	24.7307	100	1	32.8	2	46.9056	67.2	90	65.4	167.1	50.8	94.78	107.6				118	76	35	6.7	58.3	79	11		9.8	77	37.9			77	38.2	56.9	38.2	77	37.9	15.1	8.7	39	77	38.2	35.8	11.7	22.6
39	1.48	63	28.7619	93	1	37.7	2	39.249	62.3	111.3	73.7	128.6	28.8	67.4	162				120	80	24.3	6.5	69.1	80.3	5.7		13.8	81.3	61.4			81.3	20.9	20.9	67.6	81.3	61.4	53.7	11	35.3	81.9	20.9	62.9	11.1	24
34	1.52	68.4	29.6053	102.5	1	38.5	2	42.066	61.5	112.6	83.5	128.6	28.9	75.7	119.9				120	80	33.6	5.5	60.9	68	16.2		15.6	72.5	63.7			72.5	28.9	28.9	77.8	72.5	63.7	22.3	9	58	72.5	28.9	26.9	18	46.2
36	1.55	63.4	26.3892	94.6	1	39.1	2	38.6106	60.9	104.6	52.3	140.9	34.1	85.3	107.5				100	70	28.6	7.2	64	77.5	11.3		11	76.9	62.6			76.9	33.4	33.4	36.6	76.9	62.6	30.3	13.7	25.1	76.9	33.4	41.4	7.7	23.2
48	1.56	68.5	28.1476	82.8	1	38.9	2	41.8535	61.1	121.1	71.9	138.7	27	76.3	176.6				110	80																69.9	75.3	63.3	18.8	20.9			64.6	14.3	21.3
40	1.74	89.9	29.6935	108	0	30.8	2	62.2108	69.2	149.6	97.7583	171.967	46	93.4617	163.5				120	90	46.7	11.3	41.8	80.1	15.7		4	63.5	54.8	65.9	34.1	63.5	40.9	33.5	66.8	63.5	58	35.6	12.8	53	63.5	40.9	50.2	16.1	40.2
28	1.62	70.7	26.9395	88	0	30.3	2	49.2779	69.7	102.1	79.4	176.7	39.4	100.2	185.3				110	70	35	9.4	55.8	77.7	15.8		6.3	76.1	38.4			76.1	61.5	79.3		76.1	38.4	20.6	7.1	62.2	76.1	61.5	56.2	4.9	26.5
22	1.62	59.7	22.7481	80.5	1	33	2	39.999	67	128.279	84.2	148.8	54.7	71.1	114.6				100	60	63.5	9.6	26.8	67.1	6.25		26.5		51.3	73.2	26.8		48.6	69.8	30.2
22	1.52	56.9	24.6278	83.4	1	38.4	2	35.0504	61.6	61.9	80.7	173.1	63.4	88.62	105.4				100	60	61.4	7.1	31.4	77.7	9.7		12.5		34.7	62.5	37.5		65.3	64.7	35.3
25	1.75	72	23.5102	89.5	0	26.5	2	52.92	73.5	79.3	91.3	242.9	50.5	91.08	506.6				120	80	45.7	18.5	35.6	63.8	4.8		31.3		27	70	30		25.2	59	40.9
23	1.69	64.3	22.5132	81	1	32.6	2	43.3382	67.4	63.5	85.3	142.9	78	68.5	80				100	71	35	4.7	60.1	78.5	12.6		8.7		43.9	74.8	25.2	74	41	72.2	27.8
36	1.78	100.1	31.5932	111.5	0	37.9	3	62.1621	62.1	165.9	99.4	198.3	63	94	150.8				126	86	55.5	6	38	72	13		14.4	65.4	30.1	62.6	37.4	65.4	65.2		49	65.4	79.3	30.3	13.5	57.6	65.4	62.2	34.9	15.6	49
42	1.53	82.9	35.4137	109	1	44.9	3	45.6779	55.1	155.2	81.6	201.2	50.2	118.3	163.1				110	70	30.1	14.4	55.4	80	6.6		13.3		56.5	46.2	53.8		43.47	40	60		56.5					43.4
31	1.56	69.8	28.6818	97	1	42.5	3	40.135	57.5	114.8	75.3	158.3	36.1	94.4	138.8				112	72	35.4	7	57.5	80.3	16.1		3.4	61.9	78.4	43.8	12.5	61.9	36.6	42.5	56.2	61.9	78.4			11.8	61.9	36.6		25.9	11.8
30	1.8	106.7	32.9321	111.8	0	36.9	3	67.3277	63.1	174.2	113.6	133.4	33	44.4	280				100	80	21	6.5	72.4	78	14.7		7.1	37.4	72.5	30.5	16.7	37.4	35.4	35.3	56.3	37.4	72.5			14.6	37.4	35.4		24.9	14.6
32	1.53	59.2	25.2894	104	1	41	3	34.928	59	102.5	89.1	104.6	29.2	61.4	69.7				100	60	33.7	11.3	54.9	81.2	10		8.6	55.9	83.4	40.6	18.3	55.9	59.8	33.5	60.2	55.9	83.4		25.1	137	13	59.8		25.1	13.7
43	1.56	76.8	31.5582	107	1	44.5	3	42.624	55.5	153.6	63.8	156.7	36.8	98.7	105.7				120	70	48.6	6	45.4	65.7	24.7		9.4	44.1	61.2	44.6	14.3	44.1	31.6	39.6	61.7	44.1	61.2		33.7	22	44.1	31.6		33.7	22
41	1.57	86.1	34.9304	107.5	1	44.5	3	47.7855	55.5	157.1	71	128.7	34.2	70.2	121.2				120	80	26.1	5.5	68.3	77.7	16.6		6	75.7	69.5			75.7	28.8	28.8	31.7	75.7	69.5	21.4	12	42.9	75.7	28.8	26.9	15.8	35.6
32	1.58	77.1	30.8845	105.4	1	44.2	3	43.0218	55.8	134.6	64.2	156.4	34.1	101.8	102.1				120	80	30.1	5.9	64	77.1	14		8.8	75.6	69			75.6	18.5	18.5	84.5	75.6	69	49.7	12.1	36.5	75.6	18.5	47.9	16.9	33.6
38	1.6	81.8	31.9531	102	1	44.8	3	45.1536	55.2	150.5	87.23	168.54	41.77	114.3	77.1				100	80	32	5.6	62.2	81.6	6.8		11.5	69.9	76.8	92.8	7.2	69.9	18.5		63.95	69.9	75.3	64.6	18.8	21.3	69.9	18.5	63.3	18.8	20.9
29	1.42	52.1	25.8381	70.7	1	41.9	3	30.2701	58.1	100.4	74.4	207.9	39.4	138.98	147.6				130	90	44.2	9	46.6	78.5	11.2		10.2		48.3	78.9	21.1		27	82.9	20		48.3					27
37	1.73	115.5	38.5913	140	0	39.2	3	70.224	60.8	290	93	194	40	60	100	5.5	26	0.8	110	70	46.7663	11.0038	42.2299	68.8704	19.5079		11.6217	55.4	60.1	79.5	20.4	55.3	26.6	54.2	45	63.6	61.1	15.5	10	73.9	60.4	22.3	29.7	22.1	47.4	7700	3601.01	847.295	3251.7
47	1.53	92.7	39.6002	96	1	42.5	3	53.3025	57.5	199	164	209	42	66	504	6.9	15.46	0.23	140	89	30.1407	6.04857	63.8107	63.1229	23.588	3.32226	9.96678	54.6	64.9	51.7	46.7	53.5	32.9	47.3	53.3	54.8	64.3	17.8	17.4	64.8	55.3	64.3	18.4	16.7	64.9	6000	1808.44	362.914	3828.64
38	1.55	91.1	37.9188	112.9	1	42.8	3	52.1092	57.2	160	122	171	33	94	220	5.8	22.85	0.815	100	78	10.5877	4.59266	84.8196	77.6527	13.1833	2.49196	6.67203	66.5	59.2	7.1	32.2	64.5	28.8	44.5	14.4	68.6	31.2	42.1	11.8	46.1	64.7	60.6	23.1	8.2	68.7	10500	1111.71	482.229	8906.06
31	1.8	149.4	46.1111	150	0	39	3	91.134	61	344	145	138	34	88	78	8.2	29.3	2.225	125	85	9.93619	8.11304	81.9508	56.7068	24.5143	9.38945	9.38945	34.4	60.3	54.3	46.1	31.3	39.9	56.8	11	32.5	59.7	10.4	7.7	81.9	29.2	35.9	32.7	16.8	50.5	16300	1619.6	1322.42	13358
43	1.49	99.1	44.6376	120	1	43.2	3	56.2888	56.8	199	186	204	32	100	358	9.2	22.69	0.54	120	80	25.1596	8.12143	66.7189	73.9655	21.1207	0.0862069	4.4	62.7	76.5	57.9	41.9	61	22.5	64.3	36	61.3	75.2	22.9	8.4	68.6	61.8	20.8	24.4	7.3	68.3	9400	2365.01	763.414	6271.58
43	1.6	140.8	55	150	0	39	3	85.888	61	474	107	191	34	126	155	5.7	33.51	1.65	120	86	29.6837	7.38775	62.9286	74.4808	12.5	2.39617	10.623	70	46.3	64	36.1	65.3	29.5	29.4	70.6	72.4	54.4	29	5.6	65.3	70.9	24.2	48.2	10.2	41.5	12600	3740.15	930.856	7929
25	1.75	132.1	43.1347	136.5	0	37.2	3	82.9588	62.8	277	126	129	33	82	72	7.8	38.77	1.341	126	89	24.3952	5.98272	69.622	51.6358	35.3722	1.84922	11.1427	51.4	47.9	52.5	46.9	50.3	45.2	63.4	36.6	50.5	49.3	24.1	7	68.3	48.1	36.2	40.8	16	43	9000	2195.57	538.445	6265.98
26	1.77	129.5	41.3355	124.5	0	39	3	78.995	61	277	97	160	33	101	126	5.3	23.55	1.34	130	80	40.4244	10.6794	48.8961	76.483	12.0393	1.1583	10.3194	71.6	63.6	62.3	38	69.4	31.6	60.8	40	76.6	65.3	17.7	5.7	76.6	74.4	30.1	29.3	6.2	64.5	8800	3557.35	939.791	4302.86
21	1.78	135	42.6083	153	0	36.8	3	85.32	63.2	264	83	156.2	30	98.8	137	5.5	9.92	0.178	130	80	13.7423	8.66638	77.5914	57.7495	29.7948	2.40623	10.0495	56.1	51.3	75.2	24.6	52.8	41.4	61.3	20	55.4	51.6	23.9	5	71.1	55	39	55.1	14.4	30.5	7480	1027.92	648.245	5803.83
33	1.58	89.7	35.9317	111	1	41.7	3	52.2951	58.3	147	99	174	42	109	115	5.6	12.5	0.217	119	79	20.886	6.71216	72.4018	59.1064	25.4978	10.0534	5.3424	55.1	43	41.3	58.7	59.8	47.8	45.4	55.1	63.4	35.3	40.9	22	37	60.6	47.3	39.3	24.4	36.3	4400	918.984	295.335	3185.68
37	1.65	96.7	35.5188	122.2	0	37.7	3	60.2441	62.3	264	90	212	65	113	169	5.7	12.92	0.894	112	68	40.7324	7.02541	52.2422	67.2511	23.0914	0.755328	8.90208	61.4	72.4	64	36.7	62.7	23.1	84.7	15.3	64.6	73.3				58.4	19.1	21.1	5.8	73.1	8100	3299.33	569.058	4231.61
24	1.6	99.6	38.9062	128.7	1	44	3	55.776	56	173	101	191	42	128	105	5.3	31.01	0.292	120	80	33.2357	13.7172	53.0471	51.8387	24.7419	9.74194	13.6774	57.3	41.2	35.2	64.9	59.4	42.6	38.6	61.4	58.9	46.2				56	41.2				8200	2725.33	1124.81	4349.86
54	1.6	127.1	49.6484	135	0	39	3	77.531	61	422	96	202	35	137	152	5.9	11.37	1.695	118	80	37.2881	4.93947	57.7724	52.1442	29.6621	10.0715	8.12216	65.2	71.6	11.4	88	62.1	30			61.2	67.9	14.5	12	73.5	59.4	26.2				12800	4772.88	632.252	7394.87
40	1.59	91.1	36.035	103	1	42.2	3	52.6558	57.8	134	93	222	44	136	207	5.4	11.69	0.567	129	77	29.2183	2.65063	68.1311	42.8044	21.5867	11.9926	23.6162	72.5	44.8	75.3	24.7	75	20		60.06	58.2	60.8	22.4	13.4	62.3	73	33.7	67.5	4.3	28.2	6900	2016.06	182.894	4701.04
28	1.78	143	45.1332	135	0	37.7	3	89.089	62.3	305	101	214	39	138	186	5.7	46.36	0.508	135	96	27.6244	2.34405	70.0315	84.685	9.01475	0.80429	5.49598	86.1	45.6	40	50	80.1	40		38.21	87.2	47.4	37.1	15.7	47.2	81.7	39.2	18.7	12	69.3	9400	5021.19	294.028	4284.78
27	1.68	192.7	68.2752	165	1	44	3	107.912	56	160	102	146	26	95	125	6.2	18.47	0.502	110	70	25.7273	5.53264	68.7401	38.8655	51.3445	1.09244	8.69748	42.8	71.2	63.8	37.2	44.1	25.3	80.9	19.8						40.8	23.1				5500	1415	304.295	3780.7
20	1.64	94.2	35.0238	126	1	42.9	3	53.7882	57.1	121	80	112	47	30	176	5.9	9.96	0.6	116	84	43.3243	5.43109	51.2446	85.7581			14.2419	76.1	56.8	40.4	62.8	75.4	98	43.7	58.2	81.6	58	21.2	4.8	74.1	80	31.6	44	6.4	49	6400	2772.75	347.59	3279.66
38	1.59	94.5	37.3799	127	0	36.4	3	60.102	63.6	277	125	148	43	85	100	6.5	22.28	1.363	110	80	42.3338	9.43102	48.2352	91.6966				68.6	60.4	88.8	13.4	71.9	99.7	67.7	32.1	73.7	49.2	6.2	48.7	45	74.7	48.9	13.2	28.2	58	12700	5376.39	1197.74	6125.87
29	1.62	93.1	35.4748	112	1	42.3	3	53.7187	57.7	147	99	188	37	124	136	5.8	22.8	1.274	128	72	25.1295	8.28586	66.5847	49.8102	33.2543	2.65655	14.2789	48.1	51.4	23.4	77.8				48.1	54.2	50.7	15.1	8.1	76.8	52.4	31.7	35.7	13.6	50.7	6400	1608.29	530.295	4261.42
42	1.5	90.6	40.2667	112	1	42.6	3	52.0044	57.4	186	104	208	44	126	193	5.9	19.87	0.237	109	71	33.7043	6.97077	59.3249	73.122	7.09855	6.68504	13.0944	57.9	63.1	61.4	39				36.99	60.4	65.2	13.1	6.3	80.5	59.5	26.4	16.1	11.6	71.6	5000	1685.21	348.539	2966.25
34	1.9	148.2	41.0526	141	0	38.5	3	91.143	61.5	290	243	192	42	64	431	8	25.67	0.502	119	80	32.9789	6.19729	60.8239	41.1687	38.7722	13.9856	3.1	53.1	23.5	88.9	12.2	46.4	31.4	27.2	72.5	54.7	23.5	8.5	11.9	79	50	66.5	39.1	40.6	19.5	11100	3660.65	687.899	6751.45
33	1.64	118.1	43.9099	131	1	59.4	4	47.9486	40.6	290	111	138	40	75	117	5.5	21.26	4.86	110	75	18.1116	5.84677	76.0417	78.9002	11.4764		9.62343	71.1	62.4	76.1	23.9	70.3	23.2	18.3	81.3	78	61.8	9.1	6.2	83.8	76.1	11.1	31.5	27	41	12400	2245.83	725	9429.17
37	1.65	108.8	39.9633	115	1	48.9	4	55.5968	51.1	290	95	192.3	40	138	231	5.8	26	0.9	119	78	39.164	6.63029	54.2057	48.0506	48.4143		3.53506	87.5	59	51.1	48.9	83.8	29	51.1	48.9	83.5	61.1	51.2	17	31	85.1	21.8	60.5	23.6	14.9	12100	4738.84	802.265	6558.89
26	1.74	160	52.8471	160.5	0	51.6	4	77.44	48.4	290	113	145	40	70	177	6.1	22.82	1.02	136	82	19.1921	6.688	74.1199	75.3111	15.2587		9.43026	63.1	52.9	52.7	47.3	59.1	42.7	22.1	76.9	52.2	26.4	40	9.8	50	61.6	51.3	18.9	8.9	75.5	9100	1746.48	608.608	6744.91
33	1.48	103.3	47.1603	120.6	1	52.9	4	48.6543	47.1	290	81	165	44	80	203	5.4	22.43	0.9	102	70	26.62	7.52931	65.8506	83.5512	7.7342		8.7146	78.9	54.2	68.1	31.4	78	36.6	48.3	51.4	81.9	54.1	10	21.1	68	83.7	26	12.4	26	59.8	11500	3061.3	865.871	7572.82
31	1.75	157.5	51.4286	152.2	0	48.7	4	80.7975	51.3	290	126	157	28	86	214	6	38	0.26	110	70	23.3186	8.10444	68.5769	71.9385	23.136		4.92544	60.7	57	70.8	28.7	63.3	29.2	20.3	28.8	63.7	57	13.6	16.5	69	59.4	19.3	28.8	15.1	42.5	12100	2821.56	980.638	8297.81
30	1.68	114.5	40.5683	124.5	1	49.8	4	57.479	50.2	186	111	105	70	67	107	5.5	30	1.11	109	70	20.886	6.71216	72.4018	59.1064	25.4978	10.0534	5.3424	55.1	43	41.3	58.7	59.8	47.8	45.4	55.1	63.4	35.3	40.9	13.2	45	60.6	47.3	39.3	24.4	36.3	5700	1190.5	382.593	4126.9
18	1.66	128.2	46.5234	136.8	1	53.6	4	59.4848	46.4	290	98	146	47	67	163	5.9	46.2	1.04	100	70	57.06	8.7007	34.2393	65.195	27.0383		7.76668	62.6	49.2	56.5	42.5	61.4	34.2	64.5	35.1	63.9	53.6	14.5	16.9	68.1	58	25	39.9	18.2	39.6	9100	5192.46	791.763	3115.78
50	1.59	100.3	39.6741	117	1	48.5	4	51.6545	51.5	212	127	145	40	86	93	11.1	23.34	1.1	130	90	25.8322	4.82456	69.3432	72.0347	12.1022		15.8631	62.3	64.7	76.3	23.9	70	30	70	30	68.1	64	8.7	24	67.3	69	26	34.5	29.7	34.7	11300	2919.04	545.175	7835.78
40	1.61	106.5	41.0864	135	1	48.5	4	54.8475	51.5	199	103	249	33	174	211	6	15.42	3.44	132	80	28.4862	3.49947	68.0143	81.0507	11.3039		7.6454	73	70.7	87.6	12.8	73.3	22.1	81.2	18.5	74.9	74.3	45.8	19.1	34.8	72.4	30.9	82.1	8.4	9.5	11000	3133.48	384.942	7481.57
28	1.69	156.9	54.9351	152	1	53.1	4	73.5861	46.9	305	111	179	42	101	183	6.5	48.48	0.519	132	83	36.6096	5.75969	57.6307	79.9897	14.469		5.5413	63.8	61.1	71.5	25.2	64.8	24.8	55.9	36.9	65.4	49.3	47.9	22.8	29.3	61.4	93	32.5	5.4	62.1	6200	2269.79	357.101	3573.11
31	1.56	82.1	33.736	114	1	45	4	45.155	55	147	79	222	54	146	111	5.6	13.66	0.687	109	69	25.2282	5.56669	69.2051	81.5498	14.2989		4.15129	71	56	83.8	15.8	74.8	32.7	57.9	38.5	73.3	50	45.5	27.6	26.9	71	47.3	47.2	20.9	31.9	10500	2648.96	584.502	7266.53
32	1.61	106.5	41.0864	124.4	1	51.4	4	51.759	48.6	199	114	153	42	88	115	5.6	9.96	1.901	111	53	30.6936	5.9198	63.3866	78.7852	15.0514		6.16347	61.9	68	67	29.3	68	26.2	65.4	29.7	71.8	89.5	21	11.3	67	64.7	88.6	16.9	5.1	78	8600	2639.65	509.103	5451.25
42	1.472	89.2	41.167	116	1	46	4	48.168	54	199	109	205	35	152	92	5.7	15.07	0.08	125	78	30.1694	10.1626	59.6681	56.7396	17.0577	5.64612	20.5567	55.7	61	58.5	42	57.2	31.1	56.1	43.9	57.5	62.3	32.4	10	57.6	58.4	31.3	30.5	26.8	42.6	6600	1991.18	670.729	3938.09
51	1.71	146.3	50.0325	140	0	44.2	4	81.6354	55.8	448	111	178	35	110	165	6	11.24	0.36	130	102	25.3602	8.20063	66.4392	77.1266	10.9076	1.628	10.3378	77.1	57.6	60.3	39.7	74.1	39.3	39.7	8.3	77.7	33.2	40.6	14.8	44.5	75	30.2	48.2	14.7	37.1	5700	1445.53	467.436	3787.03
54	1.57	128.1	51.9697	140.5	1	53.3	4	59.8227	46.7	305	87	158	68	78	64	5.7	12.27	0.942	110	84	30.2148	9.04562	60.7396	82.1078	12.6059	3.592	4.91642	81.9	65	70.1	30.5	7.5	21.8	54	18.2	82.7	65.2	12.1	14	73.9	79.9	21.4	41.5	11.8	46.7	5800	1752.46	524.646	3522.9
39	1.77	137.5	43.889	128	0	43	4	78.375	57	290	95	118	40	60	146	5.9	68	0.259	121	75	25.2126	8.43689	66.3506	57.3807	26.6371	0.887902	15.0943	51.1	51.2	35.1	54.2	51	12.1	85	12.9	53.2	45.4	64	12.8	23.1	55.1	43	55.6	18.2	26.2	7730	1948.93	652.171	5128.9
45	1.59	91	35.9954	108.2	1	50.1	4	45.409	49.9	290	104	159	53	102	53	5.3	3.6	0.2	128	88	33.492	10.3521	56.1559	69.3807	18.8934	5.4071	6.31877	71.5	63.3	55.5	45.1	70.5	29	63.6	37	68.3	64	18.9	12.9	68.2	70.7	29.1	37.1	16.8	46.1	4770	1597.57	493.794	2678.64
46	1.53	84.6	36.1399	100	1	46.9	4	44.9226	53.1	290	122	180	48.4	114.5	90	5.8	30.69	0.0619	140	100	22.8627	10.611	66.5263	61.2868	18.1025	8.7241	11.8866	61.6	67	58.8	42	60.6	25.9	43.8	56.2	65	53.5	67.3	12.8	19.9	63.2	53.2	61.7	15.9	22.4	5460	1248.3	579.359	3632.34
26	1.7	117.3	40.5882	109	1	46.8	4	62.4036	53.2	290	95.6	175.5	40.9	114	124.7	5.8	16.49	2.244	100	70	32.5498	6.58972	60.8604	63.237	13.6416	5.20231	17.9191	61.6	67	58.8	42	60.6	25.9	43.8	56.2	65	53.5	67.3	12.8	19.9	63.2	53.2	61.7	15.9	22.4	7480	2434.73	492.911	4552.36
29	1.62	110.3	42.0287	137.5	1	52	4	52.944	48	199	102	166	51	92	117	5.6	15.81	0.171	120	80	36.1346	8.42562	55.4397	55.5258	30.2575	3.88948	10.3273	53.4	49.7	53.8	24.6	52.4	45.1	34.1	66.2	48.7	48.1	16.8	7.8	75.3	53.7	42.6	37.3	17.9	44.8	10100	1287.82	959.058	7353.12
34	1.48	114.9	52.4562	136.5	1	55.6	4	51.0156	44.4	277	107	189	37	116	183	5.7	26.97	1.02	140	100	13.4148	9.99018	76.595	69.8074	14.9401	8.48516	6.76731	76.3	64.4	52.7	47.8	72.3	31.2	52.1	47.9	76.2	61.7	13.9	8.2	77	74.8	30.3		8.9	90.9	9600	1952.11	1224.46	6423.43
30	1.63	147.1	55.3653	137.5	1	67.1	4	48.3959	32.9	290	102	170	32	90	244	5.7	43.19	1.67	120	80	20.3344	12.7548	66.9108	79.8082	8.00902	4.96334	7.2194	83.1	60.7	62.6	37.7	81.5	33	51	49.2	85.3	64	12.1	10.5	77.4	83.6	27.6				9600	1952.11	1224.46	6423.43
31	1.57	92	37.324	105	1	46.6	4	49.128	53.4	160	104	201	35	88	389	5.5	20.62	0.544	120	80	10.8938	9.36909	79.7371	37.01	31.9052	1.91431	29.1705	51.2	56.8	33.8	66.5	46.5	28.5	36.1	63.9	48.4					44	25.6				8200	893.291	768.265	6538.44
38	1.838	187.2	55.4134	161	0	52.3	4	89.2944	47.7	264	99	192	38	123	154	5.8	36.11	0.7	125	66	36.5584	7.94554	55.496	77.6304	15.4141	3.33039	3.62511	69.5	43.6	51.2	49.7	71.7	51.4			73.2	45.1	41.8	7.5	50	70.1	45.3	17.7	8.8	73.5	8200	2997.79	651.534	4550.68
50	1.64	96.4	35.8418	122	1	52.8	4	45.5008	47.2	212	118	186	44	110	166	7	20.26	0.647	140	84	36.1502	8.42607	55.4237	65.0249	28.8653	0.74813	5.3616	60.2	72.1	56.3	45.2	59.1	24.9	82.1	17.9	65	74.4	18.4	6	75.6	61.5	19.2	16.8	8.8	72.3	6300	2277.46	530.843	3491.7
41	1.6	98.6	38.5156	118.5	1	47.2	4	52.0608	52.8	186	92	149	29	81	195	5.6	7	0.267	108	67	19.1878	10.1686	70.6436	63.3494	10.7544	3.74532	22.1509	64	69.1	7.1	92.9	60.5	23.3	71	29	64.5	71.7	17.6	13.6	68.8	60.3	23.5	11	7.8	81.2		1477.46	782.979	5439.56
48	1.55	80.9	33.6733	110	1	47.3	4	42.6343	52.7	173	103	197	45	131	106	5.5	38.33	0.359	109	60	40.2084	6.04498	53.7466	61.8995	18.7208	3.78809	15.5915	64.6	66.6	15.3	85.3	64.1	31.6	42.5	58	67.7	67.2	11.5	3.8	84.6	66	28.6	18.7	8.2	73.1	5400	2171.26	326.429	2902.31
24	1.57	137.7	55.8643	163	1	58.8	4	56.7324	41.2	305	92	140	48	76	80	5.5	16.51	0.766	140	80	15.7462	2.73943	81.5144	51.2136	34.0615	10.2751	3.9	56.2	35.6	77.4	18.4	49.6	85.1	16	84	55.6	33.9	18.5	14.8	66.7	55.8	81.7	10.3	9.4	80.3	6600	1039.25	180.802	5379.95
45	1.76	150.8	48.6829	150	0	43	4	85.956	57	409	99	169	38	107	125	5.9	38.32	0.769	130	70	46.7663	11.0038	42.2299	68.8704	19.5079		11.6217	55.4	60.1	79.5	20.4	55.3	26.6	54.2	45	63.6	61.1	15.5	10	73.9	60.4	22.3	29.7	22.1	47.4	5900	2759.21	649.226	2491.56
49	1.49	107.5	48.4212	135	1	53.2	4	50.31	46.8	277	105	234	58	145	154	5.9	17.72	0.324	128	77	21.4954	3.64917	74.8554	67.6832	22.8234	2.31185	7.18151	69.2	66.4	51.1	50.2	67.9	28.6	54.7	45.3	66.1	65	29.7	7.1	63.2	64.9	31.2	16.9	13.2	69.9	5600	1203.74	204.354	4191.9
46	1.62	114.1	43.4766	121.5	1	48.1	4	59.2179	51.9	212	159	203	43	136	122	5.6	40.63	0.835	136	71	22.038	12.4314	65.5306	85.6651	7.68349	0.344037	6.30734	77	44.9	36.2	58.9	77.6	46.4	87.2	12.8	78.9	44				78.2	41.5	20	9.1	70.2	12000	2644.56	1491.77	7863.68
51	1.64	101.9	37.8867	119.3	1	47.6	4	53.3956	52.4	199	142	234	42	151	207	7.6	22.14	0.562	135	67	20.2583	9.15786	70.5838	67.8916	19.3845	3.53698	9.18695	66.9	61.8	63.8	36.6	66	27.7	56.2	44.2	73.9	64.3	17.9	10	72.1	65.7	29.4				7500	1519.37	686.84	5293.79
47	1.59	116	45.8843	128	1	58.6	4	48.024	41.4	225	103	165	36	104	125	5.5	27.91	1.031	120	80	25.1501	4.0952	70.7547	71.2963	19.0657	1.26263	8.37542	69.4	67.5	52.2	48.9	69.4	18.4	43.9	56.1											3900	980.853	159.713	2759.43
38	1.59	146	57.7509	146.4	1	55.3	4	65.262	44.7	290	99	124	34	74	85	6.1	10.54	3.075	104	70	45.5583	5.26376	49.1779	63.1318	20.6544	10.371	5.84283	70.3	66.3	46	56.3	67.9	10	83.5	20.3	74.3	67.4	26.7	5.1	68.2	66.9	23.5	43	9.8	46.5	9900	4510.28	521.112	4868.61
26	1.65	107	39.3021	132.5	1	50.4	4	53.072	49.6	186	96	158	64	56	195	5.3	21.55	2.604	125	84	33.1927	2.82573	63.9816	49.7512	34.8259	2.98507	12.4378	60	60	3.3	95.5	60	30			70	60	28.2	10.6	61.2	70	60	15.4	28.2	56.3	6900	2290.3	194.975	4414.73
27	1.7	145.9	50.4844	146.8	0	44	4	81.704	56	383	80	194	33	98	320	5.4	20.14	1.713	128	48	52.3041	3.06279	44.6332	84.685	9.01475	0.80429	5.49598	86.1	45.6	40	50	80.1	40			87.2	47.4	37.1	15.7	47.2	81.7	39.2	18.7	12	69.3	9600	5021.19	294.028	4284.78
51	1.56	103.2	42.4063	111.5	1	52.8	4	48.7104	47.2	238	105	185	38	121	130	5.5	13.7	1.2	128	77	5.92702	6.82345	87.2495	62.3622	30.6299	3.93701	3.07087	61.8	62.2	48.6	52.8	64.5	27.9	32.6	66.9						61.6	23.7				849.399	351.832	4498.77	529.704
46	1.55	119.3	49.6566	124	1	49.7	4	60.0079	50.3	264	108	190	37	114	196	6.4	21.1	1.387	163	62	23.4293	10.2922	66.2786	54.6327	24.2919	1.68027	19.3951	50.1	64.6	42.4	57.6	51.4	30.7	69.7	30.9	53	21.6	57.1	23.9	19	51.1	17	48.1	28.8	23.1	8600	2014.92	885.127	5699.96
47	1.55	83.5	34.7555	120	1	51.5	4	40.4975	48.5	212	93	224	50	129	225	5.5	9.38	0.595	125	77	33.1816	5.76155	61.0568	87.9784	6.90516	5.03328	0.0831947	64.3	71.9	51.9	50.2					72.4	69.3	34.7	6	59.3	71.5	21.7	38	9.6	52	5400	1791.81	311.123	3297.07
41	1.54	105.1	44.3161	134	1	51.5	4	50.9735	48.5	238	112	169	52	97	97	6.2	20.61	0.755	110	80	27.914	6.31566	65.7704	65.9627	25.2456	1.96464	6.82711	50.5	62.1	42.8	57.9	58.4				53.9	66.6	7.2	7	85.5	59	27.5	35.3	14.2	50	5900	1646.92	372.624	3880.45
35	1.62	117	44.5816	139	1	51.2	4	57.096	48.8	225	90	172	48	105	95	5.4	13.85	0.921	114	80	28.8417	18.6037	52.5546	54.917	28.0119	1.27714	15.794	70.8	73.5	63.6	36.9					73.9	74.7	22	14	63.8	70.7	18.6	50.8	12.4	36.8	8500	2451.54	1581.32	4467.14
39	1.6	102.4	40	111	1	51.3	4	49.8688	48.7	147	86.9	177.6	47.5	81.1	166.9				140	98	58.4	5.4	36	83.5	6.4		10	78.9	53.4	72.2	27.8	78.9	28.6	74.3	25.7	78.9	70.5	43.8	16.8	39.1	78.9	28.6	56.6	14.9	29.6
[truncated: 22 more columns]
