# Supplementary material for: The link between lymphocyte subpopulations in peripheral blood and metabolic variables in patients with severe obesity
Source: PeerJ journal article supplement (doi:10.7717/peerj.15465), 2023-06-13
Supplement: Statisticalreport.pdf [file Statisticalreport.pdf]

# STATISTICAL ANALYSIS METHOD REPORT

## The link between lymphocyte subpopulations in peripheral blood and metabolic variables in patients with severe obesity

To Peer Journal #2023:01:81490:0:3:REVIEW

- 1- We analyzed the results after divided the participants into classes of obesity based on TBF percentages.
- 2- We evaluated 124 individuals with a mean age of  $34.3 \pm 8.8$  years (Table 1S), most of whom were women (64.5%) (Table 2S). Overall, 21.0% (n = 26) of the participants formed the control group (normal TBF percentage), 20.2% (n = 25) had class 1 and 2 obesity, 25.0% (n = 31) had class 3 obesity, and 33.8% (n = 42) had class 4 obesity (Table 3S). There were no significant differences in age and sex between the groups (Table 4S).

|             | n   | Minimum | Maximum | Mean  | Deviation |
|-------------|-----|---------|---------|-------|-----------|
| edad (year) | 124 | 18      | 56      | 34.31 | 8.810     |

| sex | n   | male | female |
|-----|-----|------|--------|
| #   | 124 | 80   | 44     |
| %   | 100 | 64.5 | 35.5   |

|                    |     | Cohorts by TBF  |                       |                 |                 |
|--------------------|-----|-----------------|-----------------------|-----------------|-----------------|
| Entire study group |     | Normal body fat | Class 1 and 2 obesity | Class 3 obesity | Class 4 obesity |
| n                  | 124 | 26              | 25                    | 31              | 42              |
| %                  | 100 | 21.0            | 20.2                  | 25              | 33.8            |

| Model                                           |            | Sum of squares | gl | root mean square | F     | Significance      |
|-------------------------------------------------|------------|----------------|----|------------------|-------|-------------------|
| 1                                               | Regression | 118.949        | 2  | 34.310           | 1.559 | .073 <sup>b</sup> |
|                                                 | Residue    | 1785.046       | 8  | 9.038            |       |                   |
|                                                 | Total      | 1903.995       | 9  |                  |       |                   |
| a. Dependent variable: Age                      |            |                |    |                  |       |                   |
| b. predictors: (Constant), sex 0=male, 1=female |            |                |    |                  |       |                   |

- 3- We used the adjusted Kolmogorov–Smirnov method to determine the normality of the data. We used the Python Environment v3.6.7 statistical package (CreateSpace 2009, USA) (Table 5S supplementary)

| Variable                  | Lilliefors significance correction |          |
|---------------------------|------------------------------------|----------|
| Age                       | 0.059961084                        | Accepted |
| Weight (kg)               | 0.064643741                        | Accepted |
| WC (cm)                   | 0.235672402                        | Accepted |
| TBF (%)                   | 0.054471089                        | Accepted |
| FFM (%)                   | 0.054471089                        | Accepted |
| Total cholesterol (mg/dL) | 0.718629794                        | Accepted |
| LDL-c (mg/dL)             | 0.603645429                        | Accepted |
| Monocytes (%)             | 0.059000999                        | Accepted |
| Granulocytes (%)          | 0.055301976                        | Accepted |
| Total lymphocytes (%)     | 0.147601999                        | Accepted |

|                                                                                                                                                                                                                                                                                                                                                                                                                         |             |          |
|-------------------------------------------------------------------------------------------------------------------------------------------------------------------------------------------------------------------------------------------------------------------------------------------------------------------------------------------------------------------------------------------------------------------------|-------------|----------|
| CD4+ T lymphocytes (%)                                                                                                                                                                                                                                                                                                                                                                                                  | 0.164300012 | Accepted |
| CD4+CD62+ T lymphocytes (%)                                                                                                                                                                                                                                                                                                                                                                                             | 0.317973484 | Accepted |
| CD4+CD62- T lymphocytes (%)                                                                                                                                                                                                                                                                                                                                                                                             | 0.098739778 | Accepted |
| CD8+CD28+ T lymphocytes (%)                                                                                                                                                                                                                                                                                                                                                                                             | 0.22980821  | Accepted |
| CD8+CD28- T lymphocytes (%)                                                                                                                                                                                                                                                                                                                                                                                             | 0.146408573 | Accepted |
| CD8+CD45RA+ T lymphocytes (%)                                                                                                                                                                                                                                                                                                                                                                                           | 0.524792443 | Accepted |
| CD8+CD45RA+CD45RO+ T lymphocytes (%)                                                                                                                                                                                                                                                                                                                                                                                    | 0.098234112 | Accepted |
| Abbreviations: WC, Waist circumference; TBF, Total body fat; FFM, fat free mass; LDL-c, low-density cholesterol; CD3+, T cells; TCD4+, helper T cells; TCD4+CD62+, non-effector helper T cells; TCD4+CD62-, effector helper T cells; TCD8+CD28+, no activated cytotoxic T cells; TCD8+CD28-, activated cytotoxic T cells; CD8+CD45RA+CD45RO+ in transition from naive to memory; TCD8+CD45RO+, memory cytotoxic T cell. |             |          |

- 4- We transformed the variables that did not pass the normality test to achieve a normal distribution. We used the Python Environment v3.6.7 statistical package (CreateSpace 2009, USA) (Table 6S supplementary).

| Table 6S. Methods used to transform variables and normalize their distribution. |                       |
|---------------------------------------------------------------------------------|-----------------------|
| Variable                                                                        | Transformation method |
| BMI (kg/m <sup>2</sup> )                                                        | ln(x)                 |
| VF (cm <sup>2</sup> )                                                           | ln(x)                 |
| FFM (kg)                                                                        | 1/sqrt(x)             |
| Glucose (mg/dL)                                                                 | 1/(x <sup>2</sup> )   |
| HbA1c (mg/dL)                                                                   | 1/(x <sup>2</sup> )   |
| Insulin (μUI/mL)                                                                | sqrt(x)               |
| HDL-c (mg/dL)                                                                   | 1/sqrt(x)             |
| Triglycerides (mg/dL)                                                           | 1/sqrt(x)             |
| CRP (mg/dL)                                                                     | sqrt(x)               |
| SBP (mmHg)                                                                      | ln(x)                 |
| DBP (mmHg)                                                                      | sqrt(x)               |
| Leukocytes (cel/μL)                                                             | ln(x)                 |
| Monocytes (cel/μL)                                                              | 1/sqrt(x)             |
| Granulocytes (cel/μL)                                                           | ln(x)                 |
| Total lymphocytes (cel/μL)                                                      | ln(x)                 |
| NK lymphocytes (%)                                                              | ln(x)                 |
| NK lymphocytes (cel/μL)                                                         | ln(x)                 |
| NKT lymphocytes (%)                                                             | ln(x)                 |
| NKT lymphocytes (cel/μL)                                                        | ln(x)                 |
| CD19 B lymphocytes (%)                                                          | log10(x)              |
| CD19 B lymphocytes (cel/μL)                                                     | ln(x)                 |
| TCD3+ lymphocytes (%)                                                           | sqrt(x)               |
| TCD3+ lymphocytes (cel/μL)                                                      | ln(x)                 |
| TCD4+CD62+ lymphocytes (cel/μL)                                                 | sqrt(x)               |
| TCD4+CD62- lymphocytes (cel/μL)                                                 | sqrt(x)               |
| TCD4+CD45RA+ lymphocytes (%)                                                    | ln(x)                 |
| TCD4+CD45RA+ lymphocytes (cel/μL)                                               | ln(x)                 |
| TCD4+CD45RO+ lymphocytes (cel/μL)                                               | ln(x)                 |
| TCD4+CD45RO+ lymphocytes (%)                                                    | x <sup>2</sup>        |

|                                                |           |
|------------------------------------------------|-----------|
| TCD4+CD45RA+CD45RO+ lymphocytes (%)            | ln(x)     |
| TCD4+CD45RA+CD45RO+ lymphocytes (cel/ $\mu$ L) | 1/sqrt(x) |
| TCD8+ lymphocytes (%)                          | 1/sqrt(x) |
| TCD8+ lymphocytes (cel/ $\mu$ L)               | 1/sqrt(x) |
| TCD8+CD28+ lymphocytes (cel/ $\mu$ L)          | ln(x)     |
| TCD8+CD28- lymphocytes (cel/ $\mu$ L)          | ln(x)     |
| TCD8+CD45RA+ lymphocytes (cel/ $\mu$ L)        | ln(x)     |
| TCD8+CD45RO+ lymphocytes (cel/ $\mu$ L)        | ln(x)     |
| TCD8+CD45RA+CD45RO+ lymphocytes (cel/ $\mu$ L) | 1/sqrt(x) |

Abbreviations: BMI, body mass index; VF, Visceral Fat; FFM, fat free mass; HbA1c, glycated hemoglobin; HDL-c, high-density cholesterol; CRP, C-reactive protein; DBP, diastolic blood pressure; SBP, systolic blood pressure; NK, natural killer cells; NKT, natural killer T cells; CD3+, T cells; TCD4+, helper T cells; TCD4+CD62+, non-effector helper T cells; TCD4+CD62-, effector helper T cells, TCD4+CD45RA+: naive helper T cells; TCD4+CD45RO, memory helper T cell; TCD4+CD45RA+CD45RO+, in transition from naive to memory helper T cells; TCD8+, cytotoxic T cells; TCD8+CD28+, no activated cytotoxic T cells; TCD8+CD28-, activated cytotoxic T cells; TCD8+CD45RA+: naive cytotoxic T cells; TCD8+CD45RO+: memory cytotoxic T cell; TCD8+CD45RA+CD45RO+: in transition from naive to memory cytotoxic T cells.

ln(x): natural logarithm; 1/sqrt(x): inverse of the square root, 1/(x<sup>2</sup>): inverse-square; sqrt(x): square root; log<sub>10</sub>(x): logarithm with base 10; x<sup>2</sup>: square; 1/x: inverse.

- 5- The normally distributed data are presented as the mean and standard deviation of the mean, and the non-normally distributed variables are presented as the median and interquartile interval, to metabolic, body composition, and clinical characteristics and (Tables 7S) and immune cells relative and absolute values (Tables 8S & 9S respectively) according to the total body fat percentage. We used IBM SPSS Statistics Version 25.0 (USA).

|             | TBF (%) | Weight (kg) | BMI (kg/m <sup>2</sup> ) | WC (cm) | FFM (kg) | FFM (%) | VF (cm <sup>2</sup> ) | Glucose (mg/dL) | HbA1c (%) |
|-------------|---------|-------------|--------------------------|---------|----------|---------|-----------------------|-----------------|-----------|
| Mean        | 22.56   | 62.11       | 22.25                    | 78.53   | 48.24    | 77.43   | 72.75                 | 81.08           | 5.41      |
| Median      | 22.40   | 61.40       | 22.70                    | 80.40   | 48.42    | 77.60   | 69.00                 | 80.25           | 5.40      |
| Desviation  | 4.44    | 12.91       | 2.716                    | 8.81    | 10.92    | 4.44    | 26.09                 | 6.90            | 0.23      |
| 25 quartile | 18.75   | 49.72       | 19.62                    | 69.72   | 37.25    | 73.40   | 43.00                 | 77.63           | 5.30      |
| 50 quartile | 22.40   | 61.40       | 22.70                    | 80.40   | 48.42    | 77.60   | 69.00                 | 80.25           | 5.40      |
| 75 quartile | 26.60   | 70.45       | 24.18                    | 84.50   | 57.03    | 81.25   | 95.00                 | 86.75           | 5.55      |

<sup>a</sup>TBF diagnosis. 0= Normal body fat continue...

|             | Insulin ( $\mu$ UI/mL) | Total cholesterol (mg/dL) | HDL-c (mg/dL) | LDL-c (mg/dL) | Triglycerides (mg/dL) | CRP (mg/dL) | SBP (mmHg) | DBP (mmHg) |
|-------------|------------------------|---------------------------|---------------|---------------|-----------------------|-------------|------------|------------|
| Mean        | 5.90                   | 164.52                    | 52.84         | 86.16         | 110.78                | 0.166       | 106.77     | 70.69      |
| Median      | 6.38                   | 161.70                    | 49.95         | 83.05         | 100.05                | 0.077       | 106.00     | 70.00      |
| Desviation  | 2.01                   | 27.96                     | 12.37         | 21.20         | 42.19                 | 0.195       | 11.84      | 8.32       |
| 25 quartile | 4.28                   | 144.00                    | 44.60         | 69.50         | 81.88                 | 0.042       | 100.00     | 64.50      |
| 50 quartile | 6.38                   | 161.70                    | 49.95         | 83.05         | 100.05                | 0.082       | 107.00     | 70.00      |
| 75 quartile | 7.24                   | 175.60                    | 60.63         | 98.63         | 141.00                | 0.230       | 117.50     | 76.25      |

<sup>a</sup>TBF diagnosis. 0= Normal body fat

|            | TBF (%) | Weight (kg) | BMI (kg/m <sup>2</sup> ) | WC (cm) | FFM (kg) | FFM (%) | VF (cm <sup>2</sup> ) | Glucose (mg/dL) | HbA1c (%) |
|------------|---------|-------------|--------------------------|---------|----------|---------|-----------------------|-----------------|-----------|
| Mean       | 34.56   | 77.87       | 28.74                    | 97.42   | 51.13    | 65.44   | 128.28                | 97.76           | 7.40      |
| Median     | 34.80   | 72.00       | 28.18                    | 97.70   | 47.00    | 65.20   | 112.60                | 85.30           | 5.40      |
| Desviation | 3.95    | 22.29       | 5.71                     | 14.61   | 15.61    | 3.95    | 59.46                 | 63.10           | 4.00      |

|                                                      |       |       |       |        |       |       |        |             |       |
|------------------------------------------------------|-------|-------|-------|--------|-------|-------|--------|-------------|-------|
| 25 quartile                                          | 31.70 | 63.85 | 24.68 | 88.35  | 41.96 | 61.60 | 98.55  | 75.50       | 5.30  |
| 50 quartile                                          | 34.80 | 72.00 | 28.18 | 97.70  | 47.00 | 65.20 | 112.60 | 85.30       | 5.40  |
| 75 quartile                                          | 38.40 | 82.90 | 29.85 | 102.25 | 54.72 | 68.30 | 137.75 | 95.20       | 10.50 |
| <sup>a</sup> TBF diagnosis. 2= Class 1 and 2 obesity |       |       |       |        |       |       |        | continue... |       |

| ... continue Table 7.2S. Descriptive Statistics Class 1 and 2 obesity <sup>a</sup> |                           |                                 |                  |                  |                          |                |               |               |
|------------------------------------------------------------------------------------|---------------------------|---------------------------------|------------------|------------------|--------------------------|----------------|---------------|---------------|
|                                                                                    | Insulin<br>( $\mu$ UI/mL) | Total<br>cholesterol<br>(mg/dL) | HDL-c<br>(mg/dL) | LDL-c<br>(mg/dL) | Triglycerides<br>(mg/dL) | CRP<br>(mg/dL) | SBP<br>(mmHg) | DBP<br>(mmHg) |
| Mean                                                                               | 20.04                     | 171.97                          | 45.57            | 93.46            | 163.52                   | 0.646          | 112.72        | 74.80         |
| Median                                                                             | 14.99                     | 171.97                          | 43.90            | 92.70            | 128.30                   | 0.720          | 110.00        | 76.00         |
| Desviation                                                                         | 11.17                     | 35.80                           | 13.27            | 24.10            | 101.52                   | 0.315          | 11.02         | 10.63         |
| 25 quartile                                                                        | 11.36                     | 141.85                          | 34.55            | 76.00            | 107.55                   | 0.357          | 107.50        | 67.00         |
| 50 quartile                                                                        | 14.99                     | 171.97                          | 43.90            | 92.70            | 128.30                   | 0.726          | 110.00        | 76.00         |
| 75 quartile                                                                        | 31.25                     | 199.50                          | 53.40            | 117.75           | 184.45                   | 0.883          | 120.00        | 80.00         |
| TBF diagnosis. 0= Normal body fat                                                  |                           |                                 |                  |                  |                          |                |               |               |

| Table 7.3S. Descriptive Statistics Class 3 obesity <sup>a</sup> |            |                |                             |            |             |            |                          |                    |              |
|-----------------------------------------------------------------|------------|----------------|-----------------------------|------------|-------------|------------|--------------------------|--------------------|--------------|
|                                                                 | TBF<br>(%) | Weight<br>(kg) | BMI<br>(kg/m <sup>2</sup> ) | WC<br>(cm) | FFM<br>(kg) | FFM<br>(%) | VF<br>(cm <sup>2</sup> ) | Glucose<br>(mg/dL) | HbA1c<br>(%) |
| Mean                                                            | 40.99      | 104.46         | 38.60                       | 120.22     | 61.99       | 59.01      | 210.28                   | 105.67             | 6.28         |
| Median                                                          | 41.90      | 94.50          | 37.38                       | 112.90     | 55.78       | 58.10      | 173.00                   | 99.00              | 5.80         |
| Desviation                                                      | 2.78       | 30.37          | 8.57                        | 20.10      | 19.23       | 2.78       | 92.49                    | 37.08              | 1.10         |
| 25 quartile                                                     | 38.50      | 86.10          | 32.93                       | 107.00     | 47.79       | 56.80      | 147.00                   | 83.00              | 5.55         |
| 50 quartile                                                     | 41.90      | 94.50          | 37.38                       | 112.90     | 55.78       | 58.10      | 173.00                   | 99.00              | 5.80         |
| 75 quartile                                                     | 43.20      | 129.50         | 42.61                       | 135.00     | 78.90       | 61.50      | 277.00                   | 113.60             | 6.70         |
| <sup>a</sup> TBF diagnosis. 3= Class 3 obesity                  |            |                |                             |            |             |            |                          | continue...        |              |

| ... continue Table 7.3S. Descriptive Statistics Class 3 obesity <sup>a</sup> |                           |                                 |                  |                  |                          |                |               |               |
|------------------------------------------------------------------------------|---------------------------|---------------------------------|------------------|------------------|--------------------------|----------------|---------------|---------------|
|                                                                              | Insulin<br>( $\mu$ UI/mL) | Total<br>cholesterol<br>(mg/dL) | HDL-c<br>(mg/dL) | LDL-c<br>(mg/dL) | Triglycerides<br>(mg/dL) | CRP<br>(mg/dL) | SBP<br>(mmHg) | DBP<br>(mmHg) |
| Mean                                                                         | 22.24                     | 173.39                          | 39.19            | 97.98            | 167.78                   | 0.856          | 118.19        | 78.77         |
| Median                                                                       | 22.49                     | 174.00                          | 37.00            | 98.80            | 138.80                   | 0.600          | 120.00        | 80.00         |
| Desviation                                                                   | 9.79                      | 32.62                           | 8.60             | 28.43            | 100.87                   | 0.584          | 10.55         | 7.64          |
| 25 quartile                                                                  | 12.71                     | 148.00                          | 33.00            | 82.00            | 105.00                   | 0.397          | 110.00        | 72.00         |
| 50 quartile                                                                  | 22.69                     | 174.00                          | 37.00            | 98.80            | 138.80                   | 0.605          | 120.00        | 80.00         |
| 75 quartile                                                                  | 27.65                     | 202.00                          | 42.00            | 124.00           | 186.00                   | 1.340          | 126.00        | 84.00         |
| TBF diagnosis. 3= Class 3 obesity                                            |                           |                                 |                  |                  |                          |                |               |               |

| Table 7.4S. Descriptive Statistics Class 4 obesity <sup>a</sup> |            |                |                             |            |             |            |                          |                    |              |
|-----------------------------------------------------------------|------------|----------------|-----------------------------|------------|-------------|------------|--------------------------|--------------------|--------------|
|                                                                 | TBF<br>(%) | Weight<br>(kg) | BMI<br>(kg/m <sup>2</sup> ) | WC<br>(cm) | FFM<br>(kg) | FFM<br>(%) | VF<br>(cm <sup>2</sup> ) | Glucose<br>(mg/dL) | HbA1c<br>(%) |
| Mean                                                            | 50.70      | 117.18         | 44.45                       | 129.30     | 57.55       | 49.30      | 254.07                   | 104.51             | 5.94         |
| Median                                                          | 50.80      | 112.20         | 43.68                       | 128.00     | 53.01       | 49.20      | 264.00                   | 103.00             | 5.70         |
| Desviation                                                      | 4.77       | 24.60          | 6.76                        | 16.02      | 12.85       | 4.77       | 66.16                    | 15.48              | 0.94         |
| 25 quartile                                                     | 47.28      | 101.50         | 39.58                       | 116.75     | 48.59       | 47.05      | 199.00                   | 95.00              | 5.50         |
| 50 quartile                                                     | 50.80      | 112.20         | 43.68                       | 128.00     | 53.01       | 49.20      | 264.00                   | 103.00             | 5.70         |
| 75 quartile                                                     | 52.95      | 137.55         | 50.15                       | 139.25     | 60.61       | 52.73      | 290.00                   | 111.00             | 6.00         |
| <sup>a</sup> TBF diagnosis. 4= Class 4 obesity                  |            |                |                             |            |             |            |                          | continue...        |              |

| ... continue Table 7.4S. Descriptive Statistics Class 4 obesity <sup>a</sup> |                           |                                 |                  |                  |                          |                |               |               |
|------------------------------------------------------------------------------|---------------------------|---------------------------------|------------------|------------------|--------------------------|----------------|---------------|---------------|
|                                                                              | Insulin<br>( $\mu$ UI/mL) | Total<br>cholesterol<br>(mg/dL) | HDL-c<br>(mg/dL) | LDL-c<br>(mg/dL) | Triglycerides<br>(mg/dL) | CRP<br>(mg/dL) | SBP<br>(mmHg) | DBP<br>(mmHg) |
| Mean                                                                         | 23.84                     | 175.20                          | 43.33            | 103.18           | 155.63                   | 1.073          | 122.90        | 76.79         |

|                                   |       |        |       |        |        |       |        |       |
|-----------------------------------|-------|--------|-------|--------|--------|-------|--------|-------|
| Median                            | 21.10 | 173.75 | 41.45 | 101.50 | 150.00 | 0.835 | 125.00 | 77.50 |
| Desviation                        | 13.14 | 31.32  | 9.65  | 27.89  | 66.88  | 0.985 | 13.60  | 11.47 |
| 25 quartile                       | 14.46 | 156.00 | 36.75 | 80.75  | 106.75 | 0.439 | 110.00 | 70.00 |
| 50 quartile                       | 21.10 | 173.75 | 41.45 | 101.50 | 150.00 | 0.840 | 125.00 | 77.50 |
| 75 quartile                       | 30.35 | 192.73 | 48.10 | 121.50 | 195.25 | 1.155 | 132.00 | 82.25 |
| TBF diagnosis. 4= Class 4 obesity |       |        |       |        |        |       |        |       |

| (%)                                            | Total lymphocytes | Monocytes | Granulocytes | TCD3+ lymphocytes | NK lymphocytes | NKT lymphocytes | B lymphocytes | TCD4+C D62+ lymphocytes | TCD4+C D62- lymphocytes (%) | TCD4+ lymphocytes |
|------------------------------------------------|-------------------|-----------|--------------|-------------------|----------------|-----------------|---------------|-------------------------|-----------------------------|-------------------|
| Mean                                           | 27.08             | 7.31      | 65.23        | 58.14             | 21.13          | 4.11            | 15.96         | 75.82                   | 23.60                       | 49.49             |
| Median                                         | 25.77             | 7.57      | 65.10        | 59.22             | 22.47          | 3.91            | 14.64         | 80.60                   | 19.60                       | 51.55             |
| Desviation                                     | 12.02             | 1.85      | 11.44        | 16.33             | 11.19          | 3.32            | 8.85          | 18.59                   | 18.08                       | 10.12             |
| 25 quartile                                    | 17.79             | 6.33      | 59.63        | 47.16             | 11.38          | 1.49            | 10.12         | 71.80                   | 13.43                       | 43.48             |
| 50 quartile                                    | 25.77             | 7.57      | 65.10        | 59.22             | 22.47          | 3.91            | 14.64         | 80.60                   | 19.60                       | 51.55             |
| 75 quartile                                    | 33.17             | 8.73      | 74.34        | 66.52             | 30.27          | 5.49            | 20.97         | 87.50                   | 28.20                       | 57.85             |
| <sup>a</sup> TBF diagnosis. 0= Normal body fat |                   |           |              |                   |                | continue...     |               |                         |                             |                   |

| (%)                                            | TCD8 + lymphocytes | TCD8+ CD28+ lymphocytes | TCD8+ CD28- lymphocytes | TCD4+C D45RA+ lymphocytes | TCD4+CD45RA+CD45RO+ lymphocytes | TCD4+C D45RO+ lymphocytes | TCD8+C D45RA+ lymphocytes | TCD8+CD45RA+CD45RO+ lymphocytes | TCD8+C D45RO+ lymphocytes |
|------------------------------------------------|--------------------|-------------------------|-------------------------|---------------------------|---------------------------------|---------------------------|---------------------------|---------------------------------|---------------------------|
| Mean                                           | 51.99              | 46.12                   | 47.64                   | 24.71                     | 10.41                           | 62.48                     | 44.98                     | 16.51                           | 35.89                     |
| Median                                         | 56.80              | 37.25                   | 53.65                   | 23.00                     | 9.65                            | 61.30                     | 43.75                     | 15.15                           | 34.05                     |
| Desviation                                     | 21.08              | 21.46                   | 23.68                   | 13.74                     | 3.07                            | 13.18                     | 11.92                     | 9.46                            | 11.11                     |
| 25 quartile                                    | 31.70              | 26.95                   | 24.85                   | 13.55                     | 8.28                            | 55.83                     | 33.78                     | 10.60                           | 28.30                     |
| 50 quartile                                    | 56.80              | 37.25                   | 53.65                   | 23.00                     | 9.65                            | 61.30                     | 43.75                     | 15.15                           | 34.05                     |
| 75 quartile                                    | 65.88              | 63.78                   | 67.78                   | 32.50                     | 12.88                           | 73.93                     | 56.93                     | 20.00                           | 46.58                     |
| <sup>a</sup> TBF diagnosis. 0= Normal body fat |                    |                         |                         |                           |                                 |                           |                           |                                 |                           |

| (%)         | Total lymphocytes | Monocytes | Granulocytes | TCD3+ lymphocytes | NK lymphocytes | NKT lymphocytes | B lymphocytes | TCD4+CD 62+ lymphocytes | TCD4+C D62- lymphocytes | TCD4+ lymphocytes |
|-------------|-------------------|-----------|--------------|-------------------|----------------|-----------------|---------------|-------------------------|-------------------------|-------------------|
| Mean        | 34.96             | 7.77      | 56.91        | 71.45             | 14.64          | 4.22            | 13.57         | 59.54                   | 35.96                   | 52.84             |
| Median      | 35.00             | 7.20      | 60.10        | 77.50             | 12.60          | 2.94            | 9.89          | 62.50                   | 35.00                   | 53.10             |
| Desviation  | 13.59             | 3.29      | 14.31        | 12.28             | 7.90           | 3.47            | 11.04         | 13.12                   | 12.43                   | 11.32             |
| 25 quartile | 25.09             | 5.50      | 42.80        | 67.10             | 9.30           | 2.32            | 7.65          | 48.45                   | 26.55                   | 45.80             |
| 50 quartile | 35.00             | 7.20      | 60.10        | 77.50             | 12.60          | 2.94            | 9.90          | 62.50                   | 35.00                   | 53.10             |
| 75 quartile | 45.70             | 9.40      | 66.30        | 79.70             | 18.76          | 6.75            | 15.60         | 67.95                   | 48.00                   | 62.60             |

<sup>a</sup>TBF diagnosis. 2= Class 1 and 2 obesity

continue...

... continue Table 8.2S. **Descriptive Statistics Class 1 and 2 obesity<sup>a</sup>**

| (%)         | TCD8 + lymphocytes | TCD8+CD28+ lymphocytes | TCD8+CD28- lymphocytes | TCD4+CD45RA+ lymphocytes | TCD4+CD45RA+CD45RO+ lymphocytes | TCD4+CD45RO+ lymphocytes | TCD8+CD45RA+ lymphocytes | TCD8+CD45RA+CD45RO+ lymphocytes | TCD8+CD45RO+ lymphocytes |
|-------------|--------------------|------------------------|------------------------|--------------------------|---------------------------------|--------------------------|--------------------------|---------------------------------|--------------------------|
| Mean        | 36.20              | 57.39                  | 40.31                  | 35.64                    | 13.46                           | 46.45                    | 45.84                    | 15.14                           | 35.22                    |
| Median      | 36.10              | 59.00                  | 35.95                  | 32.40                    | 13.25                           | 42.05                    | 46.20                    | 13.75                           | 36.10                    |
| Deviation   | 12.52              | 17.40                  | 16.78                  | 17.76                    | 5.30                            | 17.25                    | 16.41                    | 6.88                            | 15.05                    |
| 25 quartile | 25.70              | 45.10                  | 28.40                  | 21.35                    | 8.55                            | 34.73                    | 34.48                    | 10.43                           | 23.05                    |
| 50 quartile | 35.90              | 59.00                  | 35.95                  | 32.40                    | 13.25                           | 42.05                    | 46.20                    | 13.75                           | 36.10                    |
| 75 quartile | 41.00              | 71.40                  | 47.70                  | 48.98                    | 18.78                           | 62.45                    | 57.60                    | 20.95                           | 43.73                    |

<sup>a</sup>TBF diagnosis. 2= Class 1 and 2 obesity

**Table 8.3S. Descriptive Statistics Class 3 obesity<sup>a</sup>**

| (%)         | Total lymphocytes | Monocytes | Granulocytes (%) | TCD3+ lymphocytes | NK lymphocytes | NKT lymphocytes | B lymphocytes | TCD4+CD62+ lymphocytes | TCD4+CD62- lymphocytes | TCD4+ lymphocytes |
|-------------|-------------------|-----------|------------------|-------------------|----------------|-----------------|---------------|------------------------|------------------------|-------------------|
| Mean        | 31.60             | 7.32      | 61.03            | 68.10             | 20.32          | 5.05            | 9.85          | 54.43                  | 37.23                  | 58.74             |
| Median      | 30.14             | 6.71      | 62.20            | 73.22             | 19.51          | 2.57            | 9.68          | 54.30                  | 37.20                  | 53.10             |
| Deviation   | 10.66             | 2.75      | 11.43            | 14.30             | 10.66          | 4.56            | 4.12          | 21.92                  | 20.47                  | 14.22             |
| 25 quartile | 25.16             | 5.60      | 52.24            | 56.71             | 12.27          | 1.14            | 6.99          | 40.50                  | 19.35                  | 45.80             |
| 50 quartile | 30.14             | 6.71      | 62.20            | 73.12             | 19.51          | 2.57            | 9.68          | 54.30                  | 37.20                  | 53.10             |
| 75 quartile | 40.42             | 8.67      | 68.74            | 78.50             | 25.12          | 9.82            | 11.99         | 69.60                  | 48.45                  | 62.60             |

<sup>a</sup>TBF diagnosis. 3= Class 3 obesity

continue...

... continue Table 8.3S. **Descriptive Statistics Class 3 obesity<sup>a</sup>**

| (%)         | TCD8 + lymphocytes | TCD8+CD28+ lymphocytes | TCD8+CD28- lymphocytes | TCD4+CD45RA+ lymphocytes | TCD4+CD45RA+CD45RO+ lymphocytes | TCD4+CD45RO+ lymphocytes | TCD8+CD45RA+ lymphocytes | TCD8+CD45RA+CD45RO+ lymphocytes | TCD8+CD45RO+ lymphocytes |
|-------------|--------------------|------------------------|------------------------|--------------------------|---------------------------------|--------------------------|--------------------------|---------------------------------|--------------------------|
| Mean        | 38.66              | 49.64                  | 45.61                  | 24.93                    | 14.03                           | 59.07                    | 34.97                    | 15.98                           | 43.70                    |
| Median      | 31.60              | 44.95                  | 48.55                  | 21.90                    | 11.95                           | 65.25                    | 33.80                    | 15.90                           | 45.20                    |
| Deviation   | 20.05              | 18.19                  | 19.18                  | 14.37                    | 10.16                           | 26.77                    | 14.97                    | 9.08                            | 19.76                    |
| 25 quartile | 26.80              | 36.13                  | 32.00                  | 14.95                    | 7.18                            | 41.43                    | 22.60                    | 9.70                            | 26.65                    |
| 50 quartile | 31.60              | 44.95                  | 48.55                  | 21.90                    | 11.95                           | 65.05                    | 33.80                    | 15.90                           | 45.20                    |
| 75 quartile | 43.04              | 62.88                  | 60.10                  | 32.00                    | 16.98                           | 74.73                    | 44.98                    | 24.53                           | 64.60                    |

<sup>a</sup>TBF diagnosis. 3= Class 3 obesity

**Table 8.4S. Descriptive Statistics Class 4 obesity<sup>a</sup>**

| (%)         | Total lymphocytes | Monocytes | Granulocytes | TCD3+ lymphocytes | NK lymphocytes | NKT lymphocytes | B lymphocytes | TCD4+CD62+ lymphocytes | TCD4+C D62- lymphocytes | TCD4+ lymphocytes |
|-------------|-------------------|-----------|--------------|-------------------|----------------|-----------------|---------------|------------------------|-------------------------|-------------------|
| Mean        | 29.15             | 7.61      | 63.24        | 68.39             | 19.31          | 4.06            | 9.06          | 54.85                  | 44.00                   | 59.74             |
| Median      | 27.27             | 7.18      | 65.81        | 68.38             | 18.41          | 3.59            | 7.71          | 55.90                  | 43.80                   | 61.45             |
| Desviation  | 11.47             | 3.09      | 11.45        | 11.91             | 9.19           | 2.99            | 5.95          | 18.61                  | 18.72                   | 8.81              |
| 25 quartile | 21.34             | 5.71      | 55.48        | 60.74             | 11.95          | 1.65            | 6.46          | 45.20                  | 29.15                   | 54.00             |
| 50 quartile | 27.27             | 7.18      | 65.81        | 68.38             | 18.41          | 3.59            | 7.71          | 55.90                  | 43.80                   | 61.45             |
| 75 quartile | 36.14             | 9.52      | 70.60        | 79.13             | 25.78          | 5.30            | 12.62         | 68.60                  | 53.15                   | 66.45             |

<sup>a</sup>TBF diagnosis. 4= Class 4 obesity

continue...

... continue Table 8.4S. **Descriptive Statistics Class 4 obesity<sup>a</sup>**

| (%)         | TCD8 + lymphocytes | TCD8+CD28+ lymphocytes | TCD8+CD28- lymphocytes | TCD4+C D45RA+ lymphocytes | TCD4+CD45RA+CD45RO+ lymphocytes | TCD4+C D45RO+ lymphocytes | TCD8+C D45RA+ lymphocytes | TCD8+CD45RA+CD45RO+ lymphocytes | TCD8+C D45RO+ lymphocytes |
|-------------|--------------------|------------------------|------------------------|---------------------------|---------------------------------|---------------------------|---------------------------|---------------------------------|---------------------------|
| Mean        | 31.61              | 53.54                  | 42.42                  | 29.51                     | 13.00                           | 57.24                     | 35.41                     | 15.59                           | 49.64                     |
| Median      | 29.00              | 54.10                  | 44.05                  | 24.35                     | 12.80                           | 65.05                     | 34.90                     | 14.70                           | 46.50                     |
| Desviation  | 12.40              | 19.15                  | 19.73                  | 17.60                     | 5.74                            | 19.98                     | 17.39                     | 7.24                            | 20.82                     |
| 25 quartile | 25.90              | 42.83                  | 28.85                  | 14.35                     | 8.10                            | 43.15                     | 18.70                     | 9.00                            | 35.50                     |
| 50 quartile | 29.00              | 54.10                  | 44.05                  | 24.35                     | 12.80                           | 65.25                     | 34.90                     | 14.70                           | 46.50                     |
| 75 quartile | 34.20              | 68.63                  | 56.18                  | 42.30                     | 16.58                           | 72.55                     | 47.88                     | 21.50                           | 70.05                     |

<sup>a</sup>TBF diagnosis. 4= Class 4 obesity

continue...

**Table 9.1S. Descriptive Statistics Normal body fat <sup>a</sup>**

| (cel/μL)    | Leukocytes | Total lymphocytes | Monocytes | Granulocytes | TCD3+ lymphocytes | NK lymphocytes | NKT lymphocytes | B lymphocytes | TCD4+C D62+ lymphocytes | TCD4+C D62- lymphocytes | TCD4+ lymphocytes |
|-------------|------------|-------------------|-----------|--------------|-------------------|----------------|-----------------|---------------|-------------------------|-------------------------|-------------------|
| Mean        | 5716.67    | 1266.26           | 419.53    | 4002.60      | 742.69            | 325.44         | 65.71           | 168.32        | 986.84                  | 279.03                  | 618.48            |
| Median      | 5800.00    | 1188.72           | 419.53    | 4167.93      | 716.94            | 308.13         | 41.24           | 154.37        | 877.99                  | 150.38                  | 507.90            |
| Desviation  | 1151.60    | 551.58            | 137.88    | 962.34       | 374.48            | 157.70         | 56.80           | 85.07         | 544.93                  | 336.57                  | 317.19            |
| 25 quartile | 4900.00    | 749.08            | 332.99    | 3123.00      | 390.33            | 188.40         | 20.67           | 114.60        | 624.83                  | 92.58                   | 374.90            |
| 50 quartile | 5800.00    | 1188.72           | 419.53    | 4167.93      | 716.94            | 308.13         | 41.24           | 154.37        | 877.99                  | 150.38                  | 507.90            |
| 75 quartile | 6675.00    | 1725.08           | 488.36    | 4585.71      | 973.91            | 420.29         | 101.56          | 200.58        | 1478.57                 | 401.15                  | 904.33            |

<sup>a</sup>TBF diagnosis. 0= Normal body fat

continue...

... continue Table 9.1S. **Descriptive Statistics Normal body fat<sup>a</sup>**

| (cel/ $\mu$ L) | TCD8 + lymphocytes | TCD8+CD28+ lymphocytes | TCD8+CD28- lymphocytes | TCD4+CD45RA+ lymphocytes | TCD4+CD45RA+CD45RO+ lymphocytes | TCD4+CD45RO+ lymphocytes | TCD8+CD45RA+ lymphocytes | TCD8+CD45RA+CD45RO+ lymphocytes | TCD8+CD45RO+ lymphocytes |
|----------------|--------------------|------------------------|------------------------|--------------------------|---------------------------------|--------------------------|--------------------------|---------------------------------|--------------------------|
| Mean           | 734.98             | 552.11                 | 604.77                 | 342.72                   | 130.73                          | 772.29                   | 577.26                   | 226.09                          | 448.46                   |
| Median         | 626.15             | 338.79                 | 508.16                 | 307.11                   | 118.85                          | 773.76                   | 495.32                   | 178.15                          | 392.14                   |
| Deviation      | 362.35             | 462.01                 | 429.10                 | 250.91                   | 73.70                           | 327.28                   | 310.63                   | 143.00                          | 253.97                   |
| 25 quartile    | 493.08             | 249.62                 | 251.71                 | 131.34                   | 69.72                           | 434.80                   | 373.43                   | 112.09                          | 246.56                   |
| 50 quartile    | 626.15             | 338.79                 | 508.16                 | 307.11                   | 118.85                          | 773.76                   | 495.32                   | 178.15                          | 392.14                   |
| 75 quartile    | 859.81             | 795.00                 | 875.30                 | 602.50                   | 141.41                          | 1083.05                  | 740.51                   | 311.55                          | 602.51                   |

<sup>a</sup>TBF diagnosis. 0= Normal body fatTable 9.2S. **Descriptive Statistics Class 1 and 2 obesity<sup>a</sup>**

| (cel/ $\mu$ L) | Leukocytes | Total lymphocytes | Monocytes | Granulocytes | TCD3+ lymphocytes | NK lymphocytes | NKT lymphocytes | B lymphocytes | TCD4+CD62+ lymphocytes | TCD4+CD62- lymphocytes | TCD4+ lymphocytes |
|----------------|------------|-------------------|-----------|--------------|-------------------|----------------|-----------------|---------------|------------------------|------------------------|-------------------|
| Mean           | 6761.67    | 1464.73           | 472.83    | 4680.27      | 960.14            | 295.33         | 55.39           | 195.56        | 836.00                 | 546.50                 | 805.06            |
| Median         | 6800.00    | 1363.50           | 418.98    | 4886.02      | 952.39            | 182.78         | 48.43           | 172.59        | 840.20                 | 413.73                 | 804.27            |
| Deviation      | 1240.65    | 711.35            | 152.81    | 842.48       | 438.74            | 308.12         | 38.05           | 93.23         | 467.86                 | 409.02                 | 296.84            |
| 25 quartile    | 6100.00    | 844.85            | 339.24    | 4080.51      | 543.66            | 145.93         | 20.46           | 125.42        | 393.24                 | 330.82                 | 525.99            |
| 50 quartile    | 6800.00    | 1363.50           | 418.98    | 4886.02      | 952.39            | 182.78         | 48.43           | 172.59        | 840.20                 | 413.73                 | 804.27            |
| 75 quartile    | 7642.50    | 2010.82           | 644.21    | 5214.18      | 1384.17           | 388.05         | 93.81           | 277.18        | 1283.97                | 723.46                 | 1076.98           |

<sup>a</sup>TBF diagnosis. 2= Class 1 and 2 obesity

continue...

... continue Table 9.2S. **Descriptive Statistics Class 1 and 2 obesity<sup>a</sup>**

| (cel/ $\mu$ L) | TCD8 + lymphocytes | TCD8+CD28+ lymphocytes | TCD8+CD28- lymphocytes | TCD4+CD45RA+ lymphocytes | TCD4+CD45RA+CD45RO+ lymphocytes | TCD4+CD45RO+ lymphocytes | TCD8+CD45RA+ lymphocytes | TCD8+CD45RA+CD45RO+ lymphocytes | TCD8+CD45RO+ lymphocytes |
|----------------|--------------------|------------------------|------------------------|--------------------------|---------------------------------|--------------------------|--------------------------|---------------------------------|--------------------------|
| Mean           | 556.52             | 819.27                 | 593.31                 | 540.77                   | 122.49                          | 801.17                   | 549.54                   | 273.26                          | 642.06                   |
| Median         | 403.61             | 580.79                 | 401.03                 | 392.17                   | 146.6                           | 773.36                   | 455.56                   | 169.95                          | 638.06                   |
| Deviation      | 454.11             | 464.17                 | 462.48                 | 480.13                   | 73.18                           | 460.80                   | 420.19                   | 260.60                          | 249.28                   |
| 25 quartile    | 222.12             | 515.74                 | 247.38                 | 196.26                   | 102.2                           | 414.56                   | 218.87                   | 76.56                           | 438.82                   |

|             |        |         |         |        |        |         |        |        |        |
|-------------|--------|---------|---------|--------|--------|---------|--------|--------|--------|
| 50 quartile | 403.61 | 580.79  | 401.03  | 392.17 | 198.12 | 773.36  | 455.56 | 169.95 | 638.06 |
| 75 quartile | 866.66 | 1348.57 | 1146.52 | 839.69 | 485.63 | 1215.91 | 826.09 | 516.32 | 799.76 |

<sup>a</sup>TBF diagnosis. 2= Class 1 and 2 obesity

| (cel/ $\mu$ L) | Leukocytes | Total lymphocytes | Monocytes | Granulocytes | TCD3+ lymphocytes | NK lymphocytes | NKT lymphocytes | B lymphocytes | TCD4+C D62+ lymphocytes | TCD4+C D62- lymphocytes | TCD4+ lymphocytes |
|----------------|------------|-------------------|-----------|--------------|-------------------|----------------|-----------------|---------------|-------------------------|-------------------------|-------------------|
| Mean           | 8794.29    | 2680.90           | 635.73    | 5487.18      | 1788.73           | 575.01         | 125.92          | 248.92        | 1496.65                 | 1140.52                 | 805.06            |
| Median         | 8200.00    | 2365.01           | 569.06    | 4349.86      | 1412.78           | 467.52         | 51.40           | 237.15        | 1120.19                 | 844.54                  | 1122.27           |
| Deviation      | 3019.12    | 1340.09           | 324.51    | 2465.69      | 1196.64           | 353.72         | 153.73          | 133.20        | 1134.34                 | 887.77                  | 296.84            |
| 25 quartile    | 6400.00    | 1613.94           | 348.06    | 3804.67      | 863.12            | 397.03         | 27.01           | 115.88        | 730.34                  | 598.34                  | 825.99            |
| 50 quartile    | 8200.00    | 2365.01           | 569.06    | 4349.86      | 1412.78           | 467.52         | 51.40           | 237.15        | 1120.19                 | 844.54                  | 1004.27           |
| 75 quartile    | 10800.00   | 3630.83           | 889.08    | 6511.51      | 2484.41           | 726.53         | 174.50          | 383.93        | 2163.90                 | 1350.99                 | 2213.98           |

<sup>a</sup>TBF diagnosis. 3= Class 3 obesity

continue...

| (cel/ $\mu$ L) | TCD8+ lymphocytes (cel/ $\mu$ L) | TCD8+CD28+ lymphocytes (cel/ $\mu$ L) | TCD8+CD28- lymphocytes (cel/ $\mu$ L) | TCD4+C D45RA+ lymphocytes (cel/ $\mu$ L) | TCD4+CD45RA+CD45RO+ lymphocytes (cel/ $\mu$ L) | TCD4+C D45RO+ lymphocytes (cel/ $\mu$ L) | TCD8+C D45RA+ lymphocytes (cel/ $\mu$ L) | TCD8+CD45RA+CD45RO+ lymphocytes (cel/ $\mu$ L) | TCD8+C D45RO+ lymphocytes (cel/ $\mu$ L) |
|----------------|----------------------------------|---------------------------------------|---------------------------------------|------------------------------------------|------------------------------------------------|------------------------------------------|------------------------------------------|------------------------------------------------|------------------------------------------|
| Mean           | 1185.50                          | 1349.96                               | 1154.46                               | 534.75                                   | 389.08                                         | 1784.66                                  | 813.14                                   | 391.26                                         | 1325.69                                  |
| Median         | 957.87                           | 1075.79                               | 955.27                                | 459.81                                   | 209.47                                         | 1560.98                                  | 702.92                                   | 220.56                                         | 931.68                                   |
| Deviation      | 1178.05                          | 895.14                                | 797.15                                | 396.86                                   | 586.21                                         | 886.93                                   | 439.55                                   | 431.42                                         | 542.33                                   |
| 25 quartile    | 439.27                           | 686.43                                | 505.19                                | 294.78                                   | 131.95                                         | 1219.34                                  | 487.50                                   | 172.65                                         | 736.83                                   |
| 50 quartile    | 957.87                           | 1075.79                               | 955.27                                | 459.81                                   | 202.47                                         | 1560.98                                  | 702.92                                   | 220.56                                         | 1173.68                                  |
| 75 quartile    | 1160.99                          | 1843.98                               | 1660.13                               | 598.28                                   | 504.3                                          | 2497.02                                  | 1107.13                                  | 381.49                                         | 1587.88                                  |

<sup>a</sup>TBF diagnosis. 3= Class 3 obesity

| (cel/ $\mu$ L) | Leukocytes | Total lymphocytes | Monocytes | Granulocytes | TCD3+ lymphocytes | NK lymphocytes | NKT lymphocytes | B lymphocytes | TCD4+C D62+ | TCD4+C D62- | TCD4+ lymphocytes |
|----------------|------------|-------------------|-----------|--------------|-------------------|----------------|-----------------|---------------|-------------|-------------|-------------------|
|----------------|------------|-------------------|-----------|--------------|-------------------|----------------|-----------------|---------------|-------------|-------------|-------------------|

|                                                |         |         |        |         |         |        |        |        |             |             |             |
|------------------------------------------------|---------|---------|--------|---------|---------|--------|--------|--------|-------------|-------------|-------------|
|                                                |         |         |        |         |         |        |        |        | lymphocytes | lymphocytes |             |
| Mean                                           | 7942.23 | 2250.28 | 729.72 | 5054.64 | 1566.83 | 428.84 | 76.99  | 218.72 | 1256.82     | 989.47      | 1344.09     |
| Median                                         | 7965.00 | 2014.92 | 584.50 | 4552.36 | 1438.90 | 332.14 | 62.95  | 205.75 | 1164.84     | 873.42      | 1288.31     |
| Deviation                                      | 2614.58 | 1090.39 | 686.75 | 1909.30 | 817.84  | 388.69 | 84.25  | 126.63 | 731.25      | 611.70      | 608.18      |
| 25 quartile                                    | 5825.00 | 1498.42 | 383.77 | 3602.72 | 1058.94 | 223.44 | 26.96  | 120.86 | 694.48      | 667.43      | 931.43      |
| 50 quartile                                    | 7965.00 | 2014.92 | 584.50 | 4552.36 | 1438.90 | 332.14 | 62.95  | 165.75 | 1164.84     | 773.42      | 1288.31     |
| 75 quartile                                    | 9825.00 | 2704.09 | 797.01 | 6548.67 | 2091.19 | 475.77 | 103.31 | 350.05 | 1883.11     | 1308.46     | 1650.17     |
| <sup>a</sup> TBF diagnosis. 4= Class 4 obesity |         |         |        |         |         |        |        |        |             |             | continue... |

| ... continue Table 9.4S. <b>Descriptive Statistics Class 4 obesity<sup>a</sup></b> |                    |                        |                        |                          |                                 |                          |                          |                                 |                          |
|------------------------------------------------------------------------------------|--------------------|------------------------|------------------------|--------------------------|---------------------------------|--------------------------|--------------------------|---------------------------------|--------------------------|
| (cel/ $\mu$ L)                                                                     | TCD8 + lymphocytes | TCD8+CD28+ lymphocytes | TCD8+CD28- lymphocytes | TCD4+CD45RA+ lymphocytes | TCD4+CD45RA+CD45RO+ lymphocytes | TCD4+CD45RO+ lymphocytes | TCD8+CD45RA+ lymphocytes | TCD8+CD45RA+CD45RO+ lymphocytes | TCD8+CD45RO+ lymphocytes |
| Mean                                                                               | 704.15             | 1247.85                | 871.63                 | 688.99                   | 319.72                          | 1324.95                  | 967.02                   | 382.86                          | 1171.42                  |
| Median                                                                             | 624.93             | 1016.05                | 798.29                 | 539.34                   | 224.83                          | 1220.99                  | 1173.09                  | 268.39                          | 931.74                   |
| Deviation                                                                          | 414.85             | 846.72                 | 488.14                 | 542.64                   | 247.16                          | 725.85                   | 650.55                   | 262.71                          | 672.44                   |
| 25 quartile                                                                        | 416.10             | 572.78                 | 565.67                 | 256.99                   | 153.48                          | 707.72                   | 713.08                   | 178.04                          | 736.48                   |
| 50 quartile                                                                        | 624.93             | 1016.05                | 798.29                 | 539.34                   | 224.83                          | 1220.99                  | 702.09                   | 268.39                          | 931.74                   |
| 75 quartile                                                                        | 834.47             | 1656.59                | 1075.30                | 1118.87                  | 491.56                          | 1785.65                  | 1706.20                  | 580.30                          | 1587.19                  |
| <sup>a</sup> TBF diagnosis. 4= Class 4 obesity                                     |                    |                        |                        |                          |                                 |                          |                          |                                 |                          |

6- We applied one-way analysis of variance (ANOVA) to each variable to estimate the difference among the groups. We considered  $p < 0.05$  to indicate a statistically significant difference. To metabolic, body composition, and clinical characteristics and (Tables 10S) and immune cells relative and absolute values (Tables 11S & 12S respectively) according to the total body fat percentage. We used IBM SPSS Statistics Version 25.0 (USA).

|             |                | sum of squares | gl  | quare root of the arithmetic mean | F       | Sig.  |
|-------------|----------------|----------------|-----|-----------------------------------|---------|-------|
| Weight (kg) | between groups | 58854.236      | 3   | 19618.079                         | 34.227  | 0.000 |
|             | within groups  | 68780.419      | 120 | 573.170                           |         |       |
|             | Total          | 127634.655     | 123 |                                   |         |       |
| WC (cm)     | between groups | 48736.918      | 3   | 16245.639                         | 65.612  | 0.000 |
|             | within groups  | 29712.171      | 120 | 247.601                           |         |       |
|             | Total          | 78449.088      | 123 |                                   |         |       |
| TBF (%)     | between groups | 13389.863      | 3   | 4463.288                          | 263.322 | 0.000 |
|             | within groups  | 2033.994       | 120 | 16.950                            |         |       |
|             | Total          | 15423.857      | 123 |                                   |         |       |
| FFM (%)     | between groups | 13389.863      | 3   | 4463.288                          | 263.322 | 0.000 |

|                           |                |            |     |          |         |       |
|---------------------------|----------------|------------|-----|----------|---------|-------|
|                           | within groups  | 2033.994   | 120 | 16.950   |         |       |
|                           | Total          | 15423.857  | 123 |          |         |       |
| Total cholesterol (mg/dL) | between groups | 1939.048   | 3   | 646.349  | 0.634   | 0.595 |
|                           | within groups  | 122342.888 | 120 | 1019.524 |         |       |
|                           | Total          | 124281.935 | 123 |          |         |       |
| LDL-c (mg/dL)             | between groups | 4951.090   | 3   | 1650.363 | 2.429   | 0.069 |
|                           | within groups  | 81548.020  | 120 | 679.567  |         |       |
|                           | Total          | 86499.110  | 123 |          |         |       |
| BMI (kg/m2)               | between groups | 8.758      | 3   | 2.919    | 105.828 | 0.000 |
|                           | within groups  | 3.310      | 120 | 0.028    |         |       |
|                           | Total          | 12.068     | 123 |          |         |       |
| FFM (kg)                  | between groups | 0.005      | 3   | 0.002    | 5.535   | 0.001 |
|                           | within groups  | 0.034      | 120 | 0.000    |         |       |
|                           | Total          | 0.039      | 123 |          |         |       |
| Glucose (mg/dL)           | between groups | 0.000      | 3   | 0.000    | 11.496  | 0.000 |
|                           | within groups  | 0.000      | 120 | 0.000    |         |       |
|                           | Total          | 0.000      | 123 |          |         |       |
| HDL-c (mg/dL)             | between groups | 0.007      | 3   | 0.002    | 8.107   | 0.000 |
|                           | within groups  | 0.035      | 120 | 0.000    |         |       |
|                           | Total          | 0.042      | 123 |          |         |       |
| Triglycerides (mg/dL)     | between groups | 0.005      | 3   | 0.002    | 4.319   | 0.006 |
|                           | within groups  | 0.045      | 120 | 0.000    |         |       |
|                           | Total          | 0.050      | 123 |          |         |       |
| Insulin ( $\mu$ UI/mL)    | between groups | 69.738     | 3   | 23.246   | 19.210  | 0.000 |
|                           | within groups  | 96.809     | 80  | 1.210    |         |       |
|                           | Total          | 166.547    | 83  |          |         |       |
| CRP (mg/dL)               | between groups | 4.369      | 3   | 1.456    | 11.834  | 0.000 |
|                           | within groups  | 9.846      | 80  | 0.123    |         |       |
|                           | Total          | 14.215     | 83  |          |         |       |
| VF (cm2)                  | between groups | 29.850     | 3   | 9.950    | 81.522  | 0.000 |
|                           | within groups  | 14.646     | 120 | 0.122    |         |       |
|                           | Total          | 44.496     | 123 |          |         |       |
| HbA1c (mg/dL)             | between groups | 0.009      | 3   | 0.003    | 19.087  | 0.000 |
|                           | within groups  | 0.019      | 120 | 0.000    |         |       |
|                           | Total          | 0.028      | 123 |          |         |       |
| SBP (mmHg)                | between groups | 0.352      | 3   | 0.117    | 10.884  | 0.000 |
|                           | within groups  | 1.292      | 120 | 0.011    |         |       |
|                           | Total          | 1.644      | 123 |          |         |       |
| DBP (mmHg)                | between groups | 3.400      | 3   | 1.133    | 3.523   | 0.017 |
|                           | within groups  | 38.600     | 120 | 0.322    |         |       |
|                           | Total          | 42.000     | 123 |          |         |       |

Table 11S. ANOVA one-way. immune cells relative values

|                       |                | sum of squares | gl  | quare root of the arithmetic mean | F     | Sig.  |
|-----------------------|----------------|----------------|-----|-----------------------------------|-------|-------|
| Total lymphocytes (%) | between groups | 874.918        | 3   | 291.639                           | 2.089 | 0.105 |
|                       | within groups  | 16475.461      | 118 | 139.623                           |       |       |
|                       | Total          | 17350.379      | 121 |                                   |       |       |
| Monocytes (%)         | between groups | 4.108          | 3   | 1.369                             | 0.171 | 0.916 |
|                       | within groups  | 943.004        | 118 | 7.992                             |       |       |
|                       | Total          | 947.112        | 121 |                                   |       |       |
| Granulocytes (%)      | between groups | 959.226        | 3   | 319.742                           | 2.211 | 0.090 |
|                       | within groups  | 17066.420      | 118 | 144.631                           |       |       |
|                       | Total          | 18025.647      | 121 |                                   |       |       |
| TCD4+ lymphocytes (%) | between groups | 2153.114       | 3   | 717.705                           | 5.762 | 0.001 |
|                       | within groups  | 14699.042      | 118 | 124.568                           |       |       |
|                       | Total          | 16852.156      | 121 |                                   |       |       |

|                                      |                |              |     |              |       |       |
|--------------------------------------|----------------|--------------|-----|--------------|-------|-------|
| TCD4+CD62+ lymphocytes (%)           | between groups | 8518.727     | 3   | 2839.576     | 8.001 | 0.000 |
|                                      | within groups  | 39038.704    | 110 | 354.897      |       |       |
|                                      | Total          | 47557.431    | 113 |              |       |       |
| TCD4+CD62- lymphocytes (%)           | between groups | 6767.122     | 3   | 2255.707     | 6.751 | 0.000 |
|                                      | within groups  | 36754.488    | 110 | 334.132      |       |       |
|                                      | Total          | 43521.610    | 113 |              |       |       |
| TCD8+CD28+ lymphocytes (%)           | between groups | 1779.259     | 3   | 593.086      | 1.612 | 0.191 |
|                                      | within groups  | 38627.884    | 105 | 367.885      |       |       |
|                                      | Total          | 40407.143    | 108 |              |       |       |
| TCD8+CD28- lymphocytes (%)           | between groups | 811.113      | 3   | 270.371      | 0.672 | 0.571 |
|                                      | within groups  | 44231.493    | 110 | 402.104      |       |       |
|                                      | Total          | 45042.606    | 113 |              |       |       |
| TCD8+CD45RA+ lymphocytes (%)         | between groups | 2379.067     | 3   | 793.022      | 3.203 | 0.027 |
|                                      | within groups  | 22284.707    | 90  | 247.608      |       |       |
|                                      | Total          | 24663.774    | 93  |              |       |       |
| TCD8+CD45RO+ lymphocytes (%)         | between groups | 3642.137     | 3   | 1214.046     | 3.683 | 0.015 |
|                                      | within groups  | 31313.207    | 95  | 329.613      |       |       |
|                                      | Total          | 34955.344    | 98  |              |       |       |
| NK lymphocytes (%)                   | between groups | 1.687        | 3   | 0.562        | 1.787 | 0.154 |
|                                      | within groups  | 35.875       | 114 | 0.315        |       |       |
|                                      | Total          | 37.562       | 117 |              |       |       |
| NKT lymphocytes (%)                  | between groups | 0.183        | 3   | 0.061        | 0.053 | 0.984 |
|                                      | within groups  | 73.259       | 64  | 1.145        |       |       |
|                                      | Total          | 73.442       | 67  |              |       |       |
| TCD8+ lymphocytes (%)                | between groups | 0.022        | 3   | 0.007        | 6.221 | 0.001 |
|                                      | within groups  | 0.134        | 113 | 0.001        |       |       |
|                                      | Total          | 0.156        | 116 |              |       |       |
| TCD4+CD45RA+ lymphocytes (%)         | between groups | 1.976        | 3   | 0.659        | 1.804 | 0.152 |
|                                      | within groups  | 33.603       | 92  | 0.365        |       |       |
|                                      | Total          | 35.579       | 95  |              |       |       |
| TCD4+CD45RA+CD45RO + lymphocytes (%) | between groups | 0.497        | 3   | 0.166        | 0.753 | 0.523 |
|                                      | within groups  | 20.689       | 94  | 0.220        |       |       |
|                                      | Total          | 21.185       | 97  |              |       |       |
| TCD4+CD45RO+ lymphocytes (%)         | between groups | 36805775.943 | 3   | 12268591.981 | 2.016 | 0.117 |
|                                      | within groups  | 584301614.81 | 96  | 6086475.154  |       |       |
|                                      | Total          | 621107390.75 | 99  |              |       |       |
| TCD8+CD45RA+CD45RO + lymphocytes (%) | between groups | 0.223        | 3   | 0.074        | 0.280 | 0.840 |
|                                      | within groups  | 24.977       | 94  | 0.266        |       |       |
|                                      | Total          | 25.200       | 97  |              |       |       |
| TCD3+ lymphocytes (%)                | between groups | 10.872       | 3   | 3.624        | 1.918 | 0.130 |
|                                      | within groups  | 226.730      | 120 | 1.889        |       |       |
|                                      | Total          | 237.602      | 123 |              |       |       |
| B lymphocytes (%)                    | between groups | 1.108        | 3   | 0.369        | 3.152 | 0.028 |
|                                      | within groups  | 14.063       | 120 | 0.117        |       |       |
|                                      | Total          | 15.171       | 123 |              |       |       |

Table 12S. ANOVA one-way. immune cells absolute values

|                                  |                | sum of squares | gl | quare root of the arithmetic mean | F     | Sig.  |
|----------------------------------|----------------|----------------|----|-----------------------------------|-------|-------|
| Leukocytes (cel/ $\mu$ L)        | between groups | 1.617          | 3  | 0.539                             | 3.807 | 0.013 |
|                                  | within groups  | 11.467         | 81 | 0.142                             |       |       |
|                                  | Total          | 13.084         | 84 |                                   |       |       |
| Total lymphocytes (cel/ $\mu$ L) | between groups | 6.235          | 3  | 2.078                             | 8.131 | 0.000 |
|                                  | within groups  | 20.960         | 82 | 0.256                             |       |       |

|                                                |                |           |    |          |        |       |
|------------------------------------------------|----------------|-----------|----|----------|--------|-------|
|                                                | Total          | 27.196    | 85 |          |        |       |
| Monocytes (cel/ $\mu$ L)                       | between groups | 0.001     | 3  | 0.000    | 1.887  | 0.138 |
|                                                | within groups  | 0.013     | 82 | 0.000    |        |       |
|                                                | Total          | 0.014     | 85 |          |        |       |
| Granulocytes (cel/ $\mu$ L)                    | between groups | 0.700     | 3  | 0.233    | 1.380  | 0.255 |
|                                                | within groups  | 13.853    | 82 | 0.169    |        |       |
|                                                | Total          | 14.553    | 85 |          |        |       |
| TCD3+ lymphocytes (cel/ $\mu$ L)               | between groups | 8.237     | 3  | 2.746    | 8.132  | 0.000 |
|                                                | within groups  | 27.351    | 81 | 0.338    |        |       |
|                                                | Total          | 35.588    | 84 |          |        |       |
| NK lymphocytes (cel/ $\mu$ L)                  | between groups | 3.841     | 3  | 1.280    | 2.996  | 0.036 |
|                                                | within groups  | 34.192    | 80 | 0.427    |        |       |
|                                                | Total          | 38.033    | 83 |          |        |       |
| NKT lymphocytes (cel/ $\mu$ L)                 | between groups | 1.036     | 3  | 0.345    | 0.322  | 0.809 |
|                                                | within groups  | 67.466    | 63 | 1.071    |        |       |
|                                                | Total          | 68.502    | 66 |          |        |       |
| B lymphocytes (cel/ $\mu$ L)                   | between groups | 1.566     | 3  | 0.522    | 1.215  | 0.310 |
|                                                | within groups  | 33.937    | 79 | 0.430    |        |       |
|                                                | Total          | 35.504    | 82 |          |        |       |
| TCD4+ lymphocytes (cel/ $\mu$ L)               | between groups | 9.773     | 3  | 3.258    | 12.520 | 0.000 |
|                                                | within groups  | 21.338    | 82 | 0.260    |        |       |
|                                                | Total          | 31.111    | 85 |          |        |       |
| TCD4+CD62+ lymphocytes (cel/ $\mu$ L)          | between groups | 536.339   | 3  | 178.780  | 1.368  | 0.258 |
|                                                | within groups  | 10717.475 | 82 | 130.701  |        |       |
|                                                | Total          | 11253.815 | 85 |          |        |       |
| TCD4+CD62- lymphocytes (cel/ $\mu$ L)          | between groups | 3678.795  | 3  | 1226.265 | 14.454 | 0.000 |
|                                                | within groups  | 6956.820  | 82 | 84.839   |        |       |
|                                                | Total          | 10635.614 | 85 |          |        |       |
| TCD8+ lymphocytes (cel/ $\mu$ L)               | between groups | 0.001     | 3  | 0.000    | 2.813  | 0.045 |
|                                                | within groups  | 0.010     | 77 | 0.000    |        |       |
|                                                | Total          | 0.011     | 80 |          |        |       |
| TCD8+CD28+ lymphocytes (cel/ $\mu$ L)          | between groups | 11.213    | 3  | 3.738    | 7.907  | 0.000 |
|                                                | within groups  | 33.563    | 71 | 0.473    |        |       |
|                                                | Total          | 44.776    | 74 |          |        |       |
| TCD8+CD28- lymphocytes (cel/ $\mu$ L)          | between groups | 4.911     | 3  | 1.637    | 2.840  | 0.044 |
|                                                | within groups  | 40.352    | 70 | 0.576    |        |       |
|                                                | Total          | 45.263    | 73 |          |        |       |
| TCD4+CD45RA+ lymphocytes (cel/ $\mu$ L)        | between groups | 7.432     | 3  | 2.477    | 3.966  | 0.011 |
|                                                | within groups  | 46.857    | 75 | 0.625    |        |       |
|                                                | Total          | 54.289    | 78 |          |        |       |
| TCD4+CD45RA+CD45RO+ lymphocytes (cel/ $\mu$ L) | between groups | 0.015     | 3  | 0.005    | 9.033  | 0.000 |
|                                                | within groups  | 0.041     | 75 | 0.001    |        |       |
|                                                | Total          | 0.056     | 78 |          |        |       |
| TCD4+CD45RO+ lymphocytes (cel/ $\mu$ L)        | between groups | 7.055     | 3  | 2.352    | 6.740  | 0.000 |
|                                                | within groups  | 26.519    | 76 | 0.349    |        |       |
|                                                | Total          | 33.574    | 79 |          |        |       |
| TCD8+CD45RA+ lymphocytes (cel/ $\mu$ L)        | between groups | 2.151     | 3  | 0.717    | 1.602  | 0.196 |
|                                                | within groups  | 32.221    | 72 | 0.448    |        |       |
|                                                | Total          | 34.372    | 75 |          |        |       |
| TCD8+CD45RA+CD45RO+ lymphocytes (cel/ $\mu$ L) | between groups | 0.005     | 3  | 0.002    | 2.939  | 0.039 |
|                                                | within groups  | 0.041     | 72 | 0.001    |        |       |
|                                                | Total          | 0.046     | 75 |          |        |       |
| TCD8+CD45RO+ lymphocytes (cel/ $\mu$ L)        | between groups | 13.608    | 3  | 4.536    | 13.331 | 0.000 |
|                                                | within groups  | 24.839    | 73 | 0.340    |        |       |
|                                                | Total          | 38.448    | 76 |          |        |       |

- 7- We applied two-way ANOVA to each variable to estimate the difference among the groups by sex. We considered  $p < 0.05$  to indicate a statistically significant difference. To metabolic, body composition, and clinical characteristics and immune cells relative and absolute values (Tables 13S) according to the total body fat percentage. We used IBM SPSS Statistics Version 25.0 (USA).

| Table 13. two-way ANOVA. Metabolic, body composition, and clinical variables |                                                             |
|------------------------------------------------------------------------------|-------------------------------------------------------------|
| Dependent variable                                                           | Factors: Diagnosis by TBF <sup>a</sup> and sex <sup>b</sup> |
|                                                                              | Sig. <sup>c</sup>                                           |
| TBF (%)                                                                      | <0.001                                                      |
| Weight (kg)                                                                  | <0.001                                                      |
| BMI (kg/m <sup>2</sup> )                                                     | <0.001                                                      |
| WC (cm)                                                                      | <0.001                                                      |
| FFM (kg)                                                                     | <0.001                                                      |
| FFM (%)                                                                      | <0.001                                                      |
| VF (cm <sup>2</sup> )                                                        | <0.001                                                      |
| Glucose (mg/dL)                                                              | <0.001                                                      |
| HbA1c (%)                                                                    | 0.040                                                       |
| Insulin (μUI/mL)                                                             | <0.001                                                      |
| Total cholesterol (mg/dL)                                                    | 0.080                                                       |
| HDL-c (mg/dL)                                                                | <0.001                                                      |
| LDL-c (mg/dL)                                                                | 0.027                                                       |
| Triglycerides (mg/dL)                                                        | <0.001                                                      |
| CRP (mg/dL)                                                                  | <0.001                                                      |
| SBP (mmHg)                                                                   | <0.001                                                      |
| DBP (mmHg)                                                                   | 0.002                                                       |
| Leukocytes (%)                                                               | 0.001                                                       |
| Monocytes (%)                                                                | 0.233                                                       |
| Monocytes (cel/μL)                                                           | 0.003                                                       |
| Granulocytes (%)                                                             | 0.337                                                       |
| Granulocytes (cel/μL)                                                        | 0.097                                                       |
| Total lymphocytes (%)                                                        | 0.730                                                       |
| Total lymphocytes (cel/μL)                                                   | <0.001                                                      |
| NK (%)                                                                       | 0.618                                                       |
| NK (cel/μL)                                                                  | 0.086                                                       |
| NKT (%)                                                                      | 0.836                                                       |
| NKT (cel/μL)                                                                 | 0.357                                                       |
| CD19+ (%)                                                                    | 0.010                                                       |
| CD19+ (cel/μL)                                                               | 0.043                                                       |
| CD3+ (%)                                                                     | 0.063                                                       |
| CD3+ (cel/μL)                                                                | <0.001                                                      |
| CD4+ (%)                                                                     | <0.001                                                      |
| CD4+ (cel/μL)                                                                | <0.001                                                      |
| CD4+CD62- (%)                                                                | <0.001                                                      |
| CD4+CD62- (cel/μL)                                                           | <0.001                                                      |
| CD4+CD62+ (%)                                                                | <0.001                                                      |
| CD4+CD62+ (cel/μL)                                                           | 0.009                                                       |
| CD4+CD45RA+ (%)                                                              | 0.394                                                       |
| CD4+CD45RA+ (cel/μL)                                                         | 0.002                                                       |
| CD4+CD45RO+ (%)                                                              | 0.566                                                       |
| CD4+CD45RO+ (cel/μL)                                                         | <0.001                                                      |
| CD4+CD45RA+CD45RO+ (%)                                                       | 0.324                                                       |
| CD4+CD45RA+CD45RO+ (cel/μL)                                                  | <0.001                                                      |
| CD8+ (%)                                                                     | <0.001                                                      |
| CD8+ (cel/μL)                                                                | 0.015                                                       |
| CD8+CD28- (%)                                                                | 0.275                                                       |
| CD8+CD28- (cel/μL)                                                           | 0.015                                                       |

|                                   |                                                                                      |
|-----------------------------------|--------------------------------------------------------------------------------------|
| CD8+CD28+ (%)                     | 0.196                                                                                |
| CD8+CD28+ (cel/ $\mu$ L)          | <0.001                                                                               |
| CD8+CD45RA+ (%)                   | 0.018                                                                                |
| CD8+CD45RA+ (cel/ $\mu$ L)        | 0.066                                                                                |
| CD8+CD45RO+ (%)                   | 0.004                                                                                |
| CD8+CD45RO+ (cel/ $\mu$ L)        | <0.001                                                                               |
| CD8+CD45RA+CD45RO+ (%)            | 0.794                                                                                |
| CD8+CD45RA+CD45RO+ (cel/ $\mu$ L) | 0.011                                                                                |
| a.                                | 1= Normal body fat, 2= Class 1 and 2 obesity, 3= Class 3 obesity, 4= Class 4 obesity |
| b.                                | 0= male, 1= female                                                                   |
| c.                                | p@ = statistical significance                                                        |

8- We used the Bonferroni test post hoc test to determine intergroup mean differences. We considered  $p < 0.05$  to indicate a statistically significant difference. To metabolic, body composition, and clinical characteristics and (Tables 14S) and immune cells relative and absolute values (Tables 15S & 16S respectively) according to the total body fat percentage. We used IBM SPSS Statistics Version 25.0 (USA).

| Table 14S. Bonferroni test post hoc. Metabolic, body composition, and clinical variables |                       |                       |                           |             |       |                         |             |
|------------------------------------------------------------------------------------------|-----------------------|-----------------------|---------------------------|-------------|-------|-------------------------|-------------|
| ANOVA, multiple comparisons                                                              |                       |                       |                           |             |       |                         |             |
|                                                                                          |                       |                       | difference of means (I-J) | Desv. Error | Sig.  | Confidence interval 95% |             |
|                                                                                          |                       |                       |                           |             |       | Lower limit             | Upper limit |
| Weight (kg)                                                                              | Normal body fat       | Class 1 and 2 obesity | -15.74877                 | 6.70610     | 0.123 | -33.7392                | 2.2417      |
|                                                                                          |                       | Class 3 obesity       | -42.34206*                | 6.36666     | 0.000 | -59.4219                | -25.2622    |
|                                                                                          |                       | Class 4 obesity       | -55.05934*                | 5.97427     | 0.000 | -71.0865                | -39.0322    |
|                                                                                          | Class 1 and 2 obesity | Normal body fat       | 15.74877                  | 6.70610     | 0.123 | -2.2417                 | 33.7392     |
|                                                                                          |                       | Class 3 obesity       | -26.59329*                | 6.43554     | 0.000 | -43.8579                | -9.3287     |
|                                                                                          |                       | Class 4 obesity       | -39.31057*                | 6.04762     | 0.000 | -55.5345                | -23.0866    |
|                                                                                          | Class 3 obesity       | Normal body fat       | 42.34206*                 | 6.36666     | 0.000 | 25.2622                 | 59.4219     |
|                                                                                          |                       | Class 1 and 2 obesity | 26.59329*                 | 6.43554     | 0.000 | 9.3287                  | 43.8579     |
|                                                                                          |                       | Class 4 obesity       | -12.71728                 | 5.66889     | 0.160 | -27.9252                | 2.4906      |
|                                                                                          | Class 4 obesity       | Normal body fat       | 55.05934*                 | 5.97427     | 0.000 | 39.0322                 | 71.0865     |
|                                                                                          |                       | Class 1 and 2 obesity | 39.31057*                 | 6.04762     | 0.000 | 23.0866                 | 55.5345     |
|                                                                                          |                       | Class 3 obesity       | 12.71728                  | 5.66889     | 0.160 | -2.4906                 | 27.9252     |
| WC (cm)                                                                                  | Normal body fat       | Class 1 and 2 obesity | -18.88538*                | 4.40763     | 0.000 | -30.7097                | -7.0610     |
|                                                                                          |                       | Class 3 obesity       | -41.68151*                | 4.18453     | 0.000 | -52.9073                | -30.4557    |
|                                                                                          |                       | Class 4 obesity       | -50.86300*                | 3.92663     | 0.000 | -61.3970                | -40.3290    |
|                                                                                          | Class 1 and 2 obesity | Normal body fat       | 18.88538*                 | 4.40763     | 0.000 | 7.0610                  | 30.7097     |
|                                                                                          |                       | Class 3 obesity       | -22.79613*                | 4.22980     | 0.000 | -34.1434                | -11.4489    |
|                                                                                          |                       | Class 4 obesity       | -31.97762*                | 3.97484     | 0.000 | -42.6409                | -21.3143    |
|                                                                                          | Class 3 obesity       | Normal body fat       | 41.68151*                 | 4.18453     | 0.000 | 30.4557                 | 52.9073     |
|                                                                                          |                       | Class 1 and 2 obesity | 22.79613*                 | 4.22980     | 0.000 | 11.4489                 | 34.1434     |
|                                                                                          |                       | Class 4 obesity       | -9.18149                  | 3.72591     | 0.091 | -19.1770                | 0.8140      |
|                                                                                          | Class 4 obesity       | Normal body fat       | 50.86300*                 | 3.92663     | 0.000 | 40.3290                 | 61.3970     |
|                                                                                          |                       | Class 1 and 2 obesity | 31.97762*                 | 3.97484     | 0.000 | 21.3143                 | 42.6409     |
|                                                                                          |                       | Class 3 obesity       | 9.18149                   | 3.72591     | 0.091 | -0.8140                 | 19.1770     |
| TBF (%)                                                                                  | Normal body fat       | Class 1 and 2 obesity | -11.99862*                | 1.15322     | 0.000 | -15.0924                | -8.9049     |
|                                                                                          |                       | Class 3 obesity       | -18.42816*                | 1.09485     | 0.000 | -21.3653                | -15.4910    |
|                                                                                          |                       | Class 4 obesity       | -28.13938*                | 1.02737     | 0.000 | -30.8955                | -25.3832    |
|                                                                                          | Class 1 and 2 obesity | Normal body fat       | 11.99862*                 | 1.15322     | 0.000 | 8.9049                  | 15.0924     |
|                                                                                          |                       | Class 3 obesity       | -6.42955*                 | 1.10669     | 0.000 | -9.3985                 | -3.4606     |
|                                                                                          |                       | Class 4 obesity       | -16.14076*                | 1.03998     | 0.000 | -18.9307                | -13.3508    |
|                                                                                          | Class 3 obesity       | Normal body fat       | 18.42816*                 | 1.09485     | 0.000 | 15.4910                 | 21.3653     |
|                                                                                          |                       | Class 1 and 2 obesity | 6.42955*                  | 1.10669     | 0.000 | 3.4606                  | 9.3985      |
|                                                                                          |                       | Class 4 obesity       | -9.71121*                 | 0.97486     | 0.000 | -12.3265                | -7.0960     |
|                                                                                          | Class 4 obesity       | Normal body fat       | 28.13938*                 | 1.02737     | 0.000 | 25.3832                 | 30.8955     |
|                                                                                          |                       | Class 1 and 2 obesity | 16.14076*                 | 1.03998     | 0.000 | 13.3508                 | 18.9307     |

|                           |                       |                       |                 |          |         |          |          |        |
|---------------------------|-----------------------|-----------------------|-----------------|----------|---------|----------|----------|--------|
| FFM (%)                   | Normal body fat       | Class 3 obesity       | 9.71121*        | 0.97486  | 0.000   | 7.0960   | 12.3265  |        |
|                           |                       | Class 1 and 2 obesity | 11.99862*       | 1.15322  | 0.000   | 8.9049   | 15.0924  |        |
|                           |                       | Class 3 obesity       | 18.42816*       | 1.09485  | 0.000   | 15.4910  | 21.3653  |        |
|                           | Class 1 and 2 obesity | Class 4 obesity       | 28.13938*       | 1.02737  | 0.000   | 25.3832  | 30.8955  |        |
|                           |                       | Normal body fat       | -11.99862*      | 1.15322  | 0.000   | -15.0924 | -8.9049  |        |
|                           |                       | Class 3 obesity       | 6.42955*        | 1.10669  | 0.000   | 3.4606   | 9.3985   |        |
|                           | Class 3 obesity       | Class 4 obesity       | 16.14076*       | 1.03998  | 0.000   | 13.3508  | 18.9307  |        |
|                           |                       | Normal body fat       | -18.42816*      | 1.09485  | 0.000   | -21.3653 | -15.4910 |        |
|                           |                       | Class 1 and 2 obesity | -6.42955*       | 1.10669  | 0.000   | -9.3985  | -3.4606  |        |
|                           | Class 4 obesity       | Class 4 obesity       | 9.71121*        | 0.97486  | 0.000   | 7.0960   | 12.3265  |        |
|                           |                       | Normal body fat       | -28.13938*      | 1.02737  | 0.000   | -30.8955 | -25.3832 |        |
|                           |                       | Class 1 and 2 obesity | -16.14076*      | 1.03998  | 0.000   | -18.9307 | -13.3508 |        |
| Total cholesterol (mg/dL) | Normal body fat       | Class 3 obesity       | -9.71121*       | 0.97486  | 0.000   | -12.3265 | -7.0960  |        |
|                           |                       | Class 1 and 2 obesity | -7.462          | 8.944    | 1.000   | -31.46   | 16.53    |        |
|                           |                       | Class 3 obesity       | -8.849          | 8.491    | 1.000   | -31.63   | 13.93    |        |
|                           | Class 1 and 2 obesity | Class 4 obesity       | -10.676         | 7.968    | 1.000   | -32.05   | 10.70    |        |
|                           |                       | Normal body fat       | 7.462           | 8.944    | 1.000   | -16.53   | 31.46    |        |
|                           |                       | Class 3 obesity       | -1.387          | 8.583    | 1.000   | -24.41   | 21.64    |        |
|                           | Class 3 obesity       | Class 4 obesity       | -3.214          | 8.066    | 1.000   | -24.85   | 18.42    |        |
|                           |                       | Normal body fat       | 8.849           | 8.491    | 1.000   | -13.93   | 31.63    |        |
|                           |                       | Class 1 and 2 obesity | 1.387           | 8.583    | 1.000   | -21.64   | 24.41    |        |
|                           | Class 4 obesity       | Class 4 obesity       | -1.827          | 7.561    | 1.000   | -22.11   | 18.46    |        |
|                           |                       | Normal body fat       | 10.676          | 7.968    | 1.000   | -10.70   | 32.05    |        |
|                           |                       | Class 1 and 2 obesity | 3.214           | 8.066    | 1.000   | -18.42   | 24.85    |        |
| LDL-c (mg/dL)             | Normal body fat       | Class 3 obesity       | 1.827           | 7.561    | 1.000   | -18.46   | 22.11    |        |
|                           |                       | Class 1 and 2 obesity | -7.30631        | 7.30204  | 1.000   | -26.8955 | 12.2829  |        |
|                           |                       | Class 3 obesity       | -11.81973       | 6.93244  | 0.545   | -30.4174 | 6.7779   |        |
|                           | Class 1 and 2 obesity | Class 4 obesity       | -17.02326       | 6.50518  | 0.060   | -34.4747 | 0.4282   |        |
|                           |                       | Normal body fat       | 7.30631         | 7.30204  | 1.000   | -12.2829 | 26.8955  |        |
|                           |                       | Class 3 obesity       | -4.51342        | 7.00744  | 1.000   | -23.3123 | 14.2854  |        |
|                           | Class 3 obesity       | Class 4 obesity       | -9.71695        | 6.58505  | 0.856   | -27.3827 | 7.9487   |        |
|                           |                       | Normal body fat       | 11.81973        | 6.93244  | 0.545   | -6.7779  | 30.4174  |        |
|                           |                       | Class 1 and 2 obesity | 4.51342         | 7.00744  | 1.000   | -14.2854 | 23.3123  |        |
|                           | Class 4 obesity       | Class 4 obesity       | -5.20353        | 6.17266  | 1.000   | -21.7629 | 11.3558  |        |
|                           |                       | Normal body fat       | 17.02326        | 6.50518  | 0.060   | -0.4282  | 34.4747  |        |
|                           |                       | Class 1 and 2 obesity | 9.71695         | 6.58505  | 0.856   | -7.9487  | 27.3827  |        |
| BMI (kg/m2)               | Normal body fat       | Class 3 obesity       | 5.20353         | 6.17266  | 1.000   | -11.3558 | 21.7629  |        |
|                           |                       | Class 1 and 2 obesity | -2.4693*        | 0.04652  | 0.000   | -0.3717  | -0.1221  |        |
|                           |                       | Class 3 obesity       | -.53620*        | 0.04417  | 0.000   | -0.6547  | -0.4177  |        |
|                           | Class 1 and 2 obesity | Class 4 obesity       | -.68750*        | 0.04145  | 0.000   | -0.7987  | -0.5763  |        |
|                           |                       | Normal body fat       | .24693*         | 0.04652  | 0.000   | 0.1221   | 0.3717   |        |
|                           |                       | Class 3 obesity       | -.28927*        | 0.04465  | 0.000   | -0.4090  | -0.1695  |        |
|                           | Class 3 obesity       | Class 4 obesity       | -.44056*        | 0.04195  | 0.000   | -0.5531  | -0.3280  |        |
|                           |                       | Normal body fat       | .53620*         | 0.04417  | 0.000   | 0.4177   | 0.6547   |        |
|                           |                       | Class 1 and 2 obesity | .28927*         | 0.04465  | 0.000   | 0.1695   | 0.4090   |        |
|                           | Class 4 obesity       | Class 4 obesity       | -.15129*        | 0.03933  | 0.001   | -0.2568  | -0.0458  |        |
|                           |                       | Normal body fat       | .68750*         | 0.04145  | 0.000   | 0.5763   | 0.7987   |        |
|                           |                       | Class 1 and 2 obesity | .44056*         | 0.04195  | 0.000   | 0.3280   | 0.5531   |        |
| FFM (kg)                  | Normal body fat       | Class 3 obesity       | .15129*         | 0.03933  | 0.001   | 0.0458   | 0.2568   |        |
|                           |                       | Class 1 and 2 obesity | 0.00324         | 0.00474  | 1.000   | -0.0095  | 0.0159   |        |
|                           |                       | Class 3 obesity       | .01526*         | 0.00450  | 0.006   | 0.0032   | 0.0273   |        |
|                           | Class 1 and 2 obesity | Class 4 obesity       | .01279*         | 0.00422  | 0.018   | 0.0015   | 0.0241   |        |
|                           |                       | Normal body fat       | -0.00324        | 0.00474  | 1.000   | -0.0159  | 0.0095   |        |
|                           |                       | Class 3 obesity       | 0.01203         | 0.00455  | 0.056   | -0.0002  | 0.0242   |        |
|                           | Class 3 obesity       | Class 4 obesity       | 0.00956         | 0.00427  | 0.163   | -0.0019  | 0.0210   |        |
|                           |                       | Normal body fat       | -0.01526*       | 0.00450  | 0.006   | -0.0273  | -0.0032  |        |
|                           |                       | Class 1 and 2 obesity | -0.01203        | 0.00455  | 0.056   | -0.0242  | 0.0002   |        |
|                           |                       |                       | Class 4 obesity | -0.00247 | 0.00401 | 1.000    | -0.0132  | 0.0083 |

|                       |                       |                       |                       |           |         |         |         |         |
|-----------------------|-----------------------|-----------------------|-----------------------|-----------|---------|---------|---------|---------|
| Glucose (mg/dL)       | Class 4 obesity       | Normal body fat       | -.01279*              | 0.00422   | 0.018   | -0.0241 | -0.0015 |         |
|                       |                       | Class 1 and 2 obesity | -0.00956              | 0.00427   | 0.163   | -0.0210 | 0.0019  |         |
|                       |                       | Class 3 obesity       | 0.00247               | 0.00401   | 1.000   | -0.0083 | 0.0132  |         |
|                       | Normal body fat       | Class 1 and 2 obesity | 0.00001               | 0.00001   | 1.000   | 0.0000  | 0.0000  |         |
|                       |                       | Class 3 obesity       | .00004*               | 0.00001   | 0.004   | 0.0000  | 0.0001  |         |
|                       |                       | Class 4 obesity       | .00006*               | 0.00001   | 0.000   | 0.0000  | 0.0001  |         |
|                       | Class 1 and 2 obesity | Normal body fat       | -0.00001              | 0.00001   | 1.000   | 0.0000  | 0.0000  |         |
|                       |                       | Class 3 obesity       | 0.00003               | 0.00001   | 0.058   | 0.0000  | 0.0001  |         |
|                       |                       | Class 4 obesity       | .00005*               | 0.00001   | 0.000   | 0.0000  | 0.0001  |         |
| Class 3 obesity       | Normal body fat       | -0.00004*             | 0.00001               | 0.004     | -0.0001 | 0.0000  |         |         |
|                       | Class 1 and 2 obesity | -0.00003              | 0.00001               | 0.058     | -0.0001 | 0.0000  |         |         |
|                       | Class 4 obesity       | 0.00002               | 0.00001               | 0.810     | 0.0000  | 0.0000  |         |         |
| Class 4 obesity       | Normal body fat       | -0.00006*             | 0.00001               | 0.000     | -0.0001 | 0.0000  |         |         |
|                       | Class 1 and 2 obesity | -0.00005*             | 0.00001               | 0.000     | -0.0001 | 0.0000  |         |         |
|                       | Class 3 obesity       | -0.00002              | 0.00001               | 0.810     | 0.0000  | 0.0000  |         |         |
| HDL-c (mg/dL)         | Normal body fat       | Class 1 and 2 obesity | -0.01240              | 0.00478   | 0.064   | -0.0252 | 0.0004  |         |
|                       |                       | Class 3 obesity       | -.02217*              | 0.00454   | 0.000   | -0.0343 | -0.0100 |         |
|                       |                       | Class 4 obesity       | -.01439*              | 0.00426   | 0.006   | -0.0258 | -0.0030 |         |
|                       | Class 1 and 2 obesity | Normal body fat       | 0.01240               | 0.00478   | 0.064   | -0.0004 | 0.0252  |         |
|                       |                       | Class 3 obesity       | -0.00977              | 0.00459   | 0.212   | -0.0221 | 0.0025  |         |
|                       |                       | Class 4 obesity       | -0.00199              | 0.00431   | 1.000   | -0.0136 | 0.0096  |         |
|                       | Class 3 obesity       | Normal body fat       | .02217*               | 0.00454   | 0.000   | 0.0100  | 0.0343  |         |
|                       |                       | Class 1 and 2 obesity | 0.00977               | 0.00459   | 0.212   | -0.0025 | 0.0221  |         |
|                       |                       | Class 4 obesity       | 0.00778               | 0.00404   | 0.340   | -0.0031 | 0.0186  |         |
|                       | Class 4 obesity       | Normal body fat       | .01439*               | 0.00426   | 0.006   | 0.0030  | 0.0258  |         |
|                       |                       | Class 1 and 2 obesity | 0.00199               | 0.00431   | 1.000   | -0.0096 | 0.0136  |         |
|                       |                       | Class 3 obesity       | -0.00778              | 0.00404   | 0.340   | -0.0186 | 0.0031  |         |
|                       | Triglycerides (mg/dL) | Normal body fat       | Class 1 and 2 obesity | .01473*   | 0.00544 | 0.047   | 0.0001  | 0.0293  |
|                       |                       |                       | Class 3 obesity       | .01611*   | 0.00517 | 0.014   | 0.0022  | 0.0300  |
|                       |                       |                       | Class 4 obesity       | .01525*   | 0.00485 | 0.013   | 0.0022  | 0.0283  |
| Class 1 and 2 obesity |                       | Normal body fat       | -.01473*              | 0.00544   | 0.047   | -0.0293 | -0.0001 |         |
|                       |                       | Class 3 obesity       | 0.00138               | 0.00522   | 1.000   | -0.0126 | 0.0154  |         |
|                       |                       | Class 4 obesity       | 0.00052               | 0.00491   | 1.000   | -0.0126 | 0.0137  |         |
| Class 3 obesity       |                       | Normal body fat       | -.01611*              | 0.00517   | 0.014   | -0.0300 | -0.0022 |         |
|                       |                       | Class 1 and 2 obesity | -0.00138              | 0.00522   | 1.000   | -0.0154 | 0.0126  |         |
|                       |                       | Class 4 obesity       | -0.00086              | 0.00460   | 1.000   | -0.0132 | 0.0115  |         |
| Class 4 obesity       |                       | Normal body fat       | -.01525*              | 0.00485   | 0.013   | -0.0283 | -0.0022 |         |
|                       |                       | Class 1 and 2 obesity | -0.00052              | 0.00491   | 1.000   | -0.0137 | 0.0126  |         |
|                       |                       | Class 3 obesity       | 0.00086               | 0.00460   | 1.000   | -0.0115 | 0.0132  |         |
| Insulin (μUI/mL)      |                       | Normal body fat       | Class 1 and 2 obesity | -1.94955* | 0.55965 | 0.005   | -3.4637 | -0.4355 |
|                       |                       |                       | Class 3 obesity       | -2.21382* | 0.35890 | 0.000   | -3.1848 | -1.2428 |
|                       |                       |                       | Class 4 obesity       | -2.31679* | 0.31733 | 0.000   | -3.1753 | -1.4583 |
|                       | Class 1 and 2 obesity | Normal body fat       | 1.94955*              | 0.55965   | 0.005   | 0.4355  | 3.4637  |         |
|                       |                       | Class 3 obesity       | -0.26427              | 0.54740   | 1.000   | -1.7452 | 1.2167  |         |
|                       |                       | Class 4 obesity       | -0.36724              | 0.52109   | 1.000   | -1.7770 | 1.0426  |         |
|                       | Class 3 obesity       | Normal body fat       | 2.21382*              | 0.35890   | 0.000   | 1.2428  | 3.1848  |         |
|                       |                       | Class 1 and 2 obesity | 0.26427               | 0.54740   | 1.000   | -1.2167 | 1.7452  |         |
|                       |                       | Class 4 obesity       | -0.10297              | 0.29519   | 1.000   | -0.9016 | 0.6957  |         |
|                       | Class 4 obesity       | Normal body fat       | 2.31679*              | 0.31733   | 0.000   | 1.4583  | 3.1753  |         |
|                       |                       | Class 1 and 2 obesity | 0.36724               | 0.52109   | 1.000   | -1.0426 | 1.7770  |         |
|                       |                       | Class 3 obesity       | 0.10297               | 0.29519   | 1.000   | -0.6957 | 0.9016  |         |
|                       | CRP (mg/dL)           | Normal body fat       | Class 1 and 2 obesity | -0.41818  | 0.17848 | 0.130   | -0.9010 | 0.0647  |
|                       |                       |                       | Class 3 obesity       | -.51345*  | 0.11445 | 0.000   | -0.8231 | -0.2038 |
|                       |                       |                       | Class 4 obesity       | -.59325*  | 0.10120 | 0.000   | -0.8670 | -0.3195 |
| Class 1 and 2 obesity |                       | Normal body fat       | 0.41818               | 0.17848   | 0.130   | -0.0647 | 0.9010  |         |
|                       |                       | Class 3 obesity       | -0.09527              | 0.17457   | 1.000   | -0.5676 | 0.3770  |         |
|                       |                       | Class 4 obesity       | -0.17507              | 0.16618   | 1.000   | -0.6247 | 0.2745  |         |
| Class 3 obesity       |                       | Normal body fat       | .51345*               | 0.11445   | 0.000   | 0.2038  | 0.8231  |         |

|               |                       |                       |           |         |       |         |         |
|---------------|-----------------------|-----------------------|-----------|---------|-------|---------|---------|
|               |                       | Class 1 and 2 obesity | 0.09527   | 0.17457 | 1.000 | -0.3770 | 0.5676  |
|               |                       | Class 4 obesity       | -0.07980  | 0.09414 | 1.000 | -0.3345 | 0.1749  |
|               | Class 4 obesity       | Normal body fat       | .59325*   | 0.10120 | 0.000 | 0.3195  | 0.8670  |
|               |                       | Class 1 and 2 obesity | 0.17507   | 0.16618 | 1.000 | -0.2745 | 0.6247  |
|               |                       | Class 3 obesity       | 0.07980   | 0.09414 | 1.000 | -0.1749 | 0.3345  |
| VF (cm2)      | Normal body fat       | Class 1 and 2 obesity | -.56020*  | 0.09786 | 0.000 | -0.8227 | -0.2977 |
|               |                       | Class 3 obesity       | -1.04587* | 0.09291 | 0.000 | -1.2951 | -0.7966 |
|               |                       | Class 4 obesity       | -1.28576* | 0.08718 | 0.000 | -1.5196 | -1.0519 |
|               | Class 1 and 2 obesity | Normal body fat       | .56020*   | 0.09786 | 0.000 | 0.2977  | 0.8227  |
|               |                       | Class 3 obesity       | -.48568*  | 0.09391 | 0.000 | -0.7376 | -0.2337 |
|               |                       | Class 4 obesity       | -.72557*  | 0.08825 | 0.000 | -0.9623 | -0.4888 |
|               | Class 3 obesity       | Normal body fat       | 1.04587*  | 0.09291 | 0.000 | 0.7966  | 1.2951  |
|               |                       | Class 1 and 2 obesity | .48568*   | 0.09391 | 0.000 | 0.2337  | 0.7376  |
|               |                       | Class 4 obesity       | -.23989*  | 0.08272 | 0.027 | -0.4618 | -0.0180 |
|               | Class 4 obesity       | Normal body fat       | 1.28576*  | 0.08718 | 0.000 | 1.0519  | 1.5196  |
|               |                       | Class 1 and 2 obesity | .72557*   | 0.08825 | 0.000 | 0.4888  | 0.9623  |
|               |                       | Class 3 obesity       | .23989*   | 0.08272 | 0.027 | 0.0180  | 0.4618  |
| HbA1c (mg/dL) | Normal body fat       | Class 1 and 2 obesity | .01713*   | 0.00349 | 0.000 | 0.0078  | 0.0265  |
|               |                       | Class 3 obesity       | 0.00407   | 0.00331 | 1.000 | -0.0048 | 0.0130  |
|               |                       | Class 4 obesity       | -0.00637  | 0.00311 | 0.256 | -0.0147 | 0.0020  |
|               | Class 1 and 2 obesity | Normal body fat       | -.01713*  | 0.00349 | 0.000 | -0.0265 | -0.0078 |
|               |                       | Class 3 obesity       | -.01306*  | 0.00335 | 0.001 | -0.0220 | -0.0041 |
|               |                       | Class 4 obesity       | -.02350*  | 0.00315 | 0.000 | -0.0319 | -0.0151 |
|               | Class 3 obesity       | Normal body fat       | -0.00407  | 0.00331 | 1.000 | -0.0130 | 0.0048  |
|               |                       | Class 1 and 2 obesity | .01306*   | 0.00335 | 0.001 | 0.0041  | 0.0220  |
|               |                       | Class 4 obesity       | -.01044*  | 0.00295 | 0.003 | -0.0184 | -0.0025 |
|               | Class 4 obesity       | Normal body fat       | 0.00637   | 0.00311 | 0.256 | -0.0020 | 0.0147  |
|               |                       | Class 1 and 2 obesity | .02350*   | 0.00315 | 0.000 | 0.0151  | 0.0319  |
|               |                       | Class 3 obesity       | .01044*   | 0.00295 | 0.003 | 0.0025  | 0.0184  |
| SBP (mmHg)    | Normal body fat       | Class 1 and 2 obesity | -0.05581  | 0.02907 | 0.343 | -0.1338 | 0.0222  |
|               |                       | Class 3 obesity       | -.10385*  | 0.02759 | 0.002 | -0.1779 | -0.0298 |
|               |                       | Class 4 obesity       | -.14093*  | 0.02589 | 0.000 | -0.2104 | -0.0715 |
|               | Class 1 and 2 obesity | Normal body fat       | 0.05581   | 0.02907 | 0.343 | -0.0222 | 0.1338  |
|               |                       | Class 3 obesity       | -0.04805  | 0.02789 | 0.525 | -0.1229 | 0.0268  |
|               |                       | Class 4 obesity       | -.08513*  | 0.02621 | 0.009 | -0.1554 | -0.0148 |
|               | Class 3 obesity       | Normal body fat       | .10385*   | 0.02759 | 0.002 | 0.0298  | 0.1779  |
|               |                       | Class 1 and 2 obesity | 0.04805   | 0.02789 | 0.525 | -0.0268 | 0.1229  |
|               |                       | Class 4 obesity       | -0.03708  | 0.02457 | 0.803 | -0.1030 | 0.0288  |
|               | Class 4 obesity       | Normal body fat       | .14093*   | 0.02589 | 0.000 | 0.0715  | 0.2104  |
|               |                       | Class 1 and 2 obesity | .08513*   | 0.02621 | 0.009 | 0.0148  | 0.1554  |
|               |                       | Class 3 obesity       | 0.03708   | 0.02457 | 0.803 | -0.0288 | 0.1030  |
| DBP (mmHg)    | Normal body fat       | Class 1 and 2 obesity | -0.23400  | 0.15887 | 0.860 | -0.6602 | 0.1922  |
|               |                       | Class 3 obesity       | -.47130*  | 0.15083 | 0.013 | -0.8759 | -0.0667 |
|               |                       | Class 4 obesity       | -0.34448  | 0.14153 | 0.098 | -0.7242 | 0.0352  |
|               | Class 1 and 2 obesity | Normal body fat       | 0.23400   | 0.15887 | 0.860 | -0.1922 | 0.6602  |
|               |                       | Class 3 obesity       | -0.23730  | 0.15246 | 0.733 | -0.6463 | 0.1717  |
|               |                       | Class 4 obesity       | -0.11048  | 0.14327 | 1.000 | -0.4948 | 0.2739  |
|               | Class 3 obesity       | Normal body fat       | .47130*   | 0.15083 | 0.013 | 0.0667  | 0.8759  |
|               |                       | Class 1 and 2 obesity | 0.23730   | 0.15246 | 0.733 | -0.1717 | 0.6463  |
|               |                       | Class 4 obesity       | 0.12682   | 0.13430 | 1.000 | -0.2335 | 0.4871  |
|               | Class 4 obesity       | Normal body fat       | 0.34448   | 0.14153 | 0.098 | -0.0352 | 0.7242  |
|               |                       | Class 1 and 2 obesity | 0.11048   | 0.14327 | 1.000 | -0.2739 | 0.4948  |
|               |                       | Class 3 obesity       | -0.12682  | 0.13430 | 1.000 | -0.4871 | 0.2335  |

\*. The difference in means is significant at the 0.05 level.

Table 15S. **Bonferroni test post hoc. Immune cells relative values**

| ANOVA, multiple comparisons |                       |                       |                           |             |        |                         |             |
|-----------------------------|-----------------------|-----------------------|---------------------------|-------------|--------|-------------------------|-------------|
|                             |                       |                       | difference of means (I-J) | Desv. Error | Sig.   | Confidence interval 95% |             |
|                             |                       |                       |                           |             |        | Lower limit             | Upper limit |
| Total lymphocytes (%)       | Normal body fat       | Class 1 and 2 obesity | -7.87585                  | 3.38240     | 0.130  | -16.9524                | 1.2007      |
|                             |                       | Class 3 obesity       | -4.52233                  | 3.14230     | 0.916  | -12.9546                | 3.9099      |
|                             |                       | Class 4 obesity       | -2.06441                  | 2.94863     | 1.000  | -9.9770                 | 5.8481      |
|                             | Class 1 and 2 obesity | Normal body fat       | 7.87585                   | 3.38240     | 0.130  | -1.2007                 | 16.9524     |
|                             |                       | Class 3 obesity       | 3.35352                   | 3.25185     | 1.000  | -5.3727                 | 12.0797     |
|                             |                       | Class 4 obesity       | 5.81144                   | 3.06511     | 0.362  | -2.4137                 | 14.0365     |
|                             | Class 3 obesity       | Normal body fat       | 4.52233                   | 3.14230     | 0.916  | -3.9099                 | 12.9546     |
|                             |                       | Class 1 and 2 obesity | -3.35352                  | 3.25185     | 1.000  | -12.0797                | 5.3727      |
|                             |                       | Class 4 obesity       | 2.45792                   | 2.79791     | 1.000  | -5.0502                 | 9.9660      |
|                             | Class 4 obesity       | Normal body fat       | 2.06441                   | 2.94863     | 1.000  | -5.8481                 | 9.9770      |
|                             |                       | Class 1 and 2 obesity | -5.81144                  | 3.06511     | 0.362  | -14.0365                | 2.4137      |
|                             |                       | Class 3 obesity       | -2.45792                  | 2.79791     | 1.000  | -9.9660                 | 5.0502      |
| Monocytes (%)               | Normal body fat       | Class 1 and 2 obesity | -0.45967                  | 0.80921     | 1.000  | -2.6312                 | 1.7118      |
|                             |                       | Class 3 obesity       | -0.01278                  | 0.75177     | 1.000  | -2.0301                 | 2.0046      |
|                             |                       | Class 4 obesity       | -0.30185                  | 0.70544     | 1.000  | -2.1949                 | 1.5912      |
|                             | Class 1 and 2 obesity | Normal body fat       | 0.45967                   | 0.80921     | 1.000  | -1.7118                 | 2.6312      |
|                             |                       | Class 3 obesity       | 0.44689                   | 0.77798     | 1.000  | -1.6408                 | 2.5346      |
|                             |                       | Class 4 obesity       | 0.15782                   | 0.73330     | 1.000  | -1.8100                 | 2.1256      |
|                             | Class 3 obesity       | Normal body fat       | 0.01278                   | 0.75177     | 1.000  | -2.0046                 | 2.0301      |
|                             |                       | Class 1 and 2 obesity | -0.44689                  | 0.77798     | 1.000  | -2.5346                 | 1.6408      |
|                             |                       | Class 4 obesity       | -0.28907                  | 0.66938     | 1.000  | -2.0853                 | 1.5072      |
|                             | Class 4 obesity       | Normal body fat       | 0.30185                   | 0.70544     | 1.000  | -1.5912                 | 2.1949      |
|                             |                       | Class 1 and 2 obesity | -0.15782                  | 0.73330     | 1.000  | -2.1256                 | 1.8100      |
|                             |                       | Class 3 obesity       | 0.28907                   | 0.66938     | 1.000  | -1.5072                 | 2.0853      |
| Granulocytes (%)            | Normal body fat       | Class 1 and 2 obesity | 8.31821                   | 3.44253     | 0.103  | -0.9197                 | 17.5561     |
|                             |                       | Class 3 obesity       | 4.20361                   | 3.19816     | 1.000  | -4.3785                 | 12.7858     |
|                             |                       | Class 4 obesity       | 1.99396                   | 3.00105     | 1.000  | -6.0593                 | 10.0472     |
|                             | Class 1 and 2 obesity | Normal body fat       | -8.31821                  | 3.44253     | 0.103  | -17.5561                | 0.9197      |
|                             |                       | Class 3 obesity       | -4.11460                  | 3.30965     | 1.000  | -12.9959                | 4.7667      |
|                             |                       | Class 4 obesity       | -6.32425                  | 3.11960     | 0.269  | -14.6956                | 2.0471      |
|                             | Class 3 obesity       | Normal body fat       | -4.20361                  | 3.19816     | 1.000  | -12.7858                | 4.3785      |
|                             |                       | Class 1 and 2 obesity | 4.11460                   | 3.30965     | 1.000  | -4.7667                 | 12.9959     |
|                             |                       | Class 4 obesity       | -2.20965                  | 2.84765     | 1.000  | -9.8512                 | 5.4319      |
|                             | Class 4 obesity       | Normal body fat       | -1.99396                  | 3.00105     | 1.000  | -10.0472                | 6.0593      |
|                             |                       | Class 1 and 2 obesity | 6.32425                   | 3.11960     | 0.269  | -2.0471                 | 14.6956     |
|                             |                       | Class 3 obesity       | 2.20965                   | 2.84765     | 1.000  | -5.4319                 | 9.8512      |
| TCD4+ lymphocytes (%)       | Normal body fat       | Class 1 and 2 obesity | -3.34676                  | 3.19485     | 1.000  | -11.9200                | 5.2265      |
|                             |                       | Class 3 obesity       | -9.24702*                 | 2.96807     | 0.014  | -17.2117                | -1.2823     |
|                             |                       | Class 4 obesity       | -10.25440*                | 2.78514     | 0.002  | -17.7282                | -2.7806     |
|                             | Class 1 and 2 obesity | Normal body fat       | 3.34676                   | 3.19485     | 1.000  | -5.2265                 | 11.9200     |
|                             |                       | Class 3 obesity       | -5.90027                  | 3.07154     | 0.343  | -14.1426                | 2.3421      |
|                             |                       | Class 4 obesity       | -6.90764                  | 2.89515     | 0.112  | -14.6767                | 0.8614      |
|                             | Class 3 obesity       | Normal body fat       | 9.24702*                  | 2.96807     | 0.014  | 1.2823                  | 17.2117     |
|                             |                       | Class 1 and 2 obesity | 5.90027                   | 3.07154     | 0.343  | -2.3421                 | 14.1426     |
|                             |                       | Class 4 obesity       | -1.00737                  | 2.64277     | 1.000  | -8.0992                 | 6.0844      |
|                             | Normal body fat       | 10.25440*             | 2.78514                   | 0.002       | 2.7806 | 17.7282                 |             |

|                            |                       |                       |            |         |       |          |         |
|----------------------------|-----------------------|-----------------------|------------|---------|-------|----------|---------|
|                            | Class 4 obesity       | Class 1 and 2 obesity | 6.90764    | 2.89515 | 0.112 | -0.8614  | 14.6767 |
|                            |                       | Class 3 obesity       | 1.00737    | 2.64277 | 1.000 | -6.0844  | 8.0992  |
| TCD4+CD62+ lymphocytes (%) | Normal body fat       | Class 1 and 2 obesity | 16.27805*  | 5.87590 | 0.039 | 0.4906   | 32.0655 |
|                            |                       | Class 3 obesity       | 21.39164*  | 5.08800 | 0.000 | 7.7212   | 35.0621 |
|                            |                       | Class 4 obesity       | 20.96923*  | 4.70105 | 0.000 | 8.3384   | 33.6000 |
|                            | Class 1 and 2 obesity | Normal body fat       | -16.27805* | 5.87590 | 0.039 | -32.0655 | -0.4906 |
|                            |                       | Class 3 obesity       | 5.11359    | 5.75449 | 1.000 | -10.3476 | 20.5748 |
|                            |                       | Class 4 obesity       | 4.69118    | 5.41537 | 1.000 | -9.8589  | 19.2412 |
|                            | Class 3 obesity       | Normal body fat       | -21.39164* | 5.08800 | 0.000 | -35.0621 | -7.7212 |
|                            |                       | Class 1 and 2 obesity | -5.11359   | 5.75449 | 1.000 | -20.5748 | 10.3476 |
|                            |                       | Class 4 obesity       | -0.42241   | 4.54838 | 1.000 | -12.6430 | 11.7982 |
|                            | Class 4 obesity       | Normal body fat       | -20.96923* | 4.70105 | 0.000 | -33.6000 | -8.3384 |
|                            |                       | Class 1 and 2 obesity | -4.69118   | 5.41537 | 1.000 | -19.2412 | 9.8589  |
|                            |                       | Class 3 obesity       | 0.42241    | 4.54838 | 1.000 | -11.7982 | 12.6430 |
| TCD4+CD62- lymphocytes (%) | Normal body fat       | Class 1 and 2 obesity | -12.35498  | 5.70141 | 0.194 | -27.6736 | 2.9636  |
|                            |                       | Class 3 obesity       | -13.62374* | 4.93690 | 0.041 | -26.8883 | -0.3592 |
|                            |                       | Class 4 obesity       | -20.49139* | 4.56144 | 0.000 | -32.7471 | -8.2357 |
|                            | Class 1 and 2 obesity | Normal body fat       | 12.35498   | 5.70141 | 0.194 | -2.9636  | 27.6736 |
|                            |                       | Class 3 obesity       | -1.26876   | 5.58360 | 1.000 | -16.2708 | 13.7333 |
|                            |                       | Class 4 obesity       | -8.13641   | 5.25455 | 0.746 | -22.2544 | 5.9816  |
|                            | Class 3 obesity       | Normal body fat       | 13.62374*  | 4.93690 | 0.041 | 0.3592   | 26.8883 |
|                            |                       | Class 1 and 2 obesity | 1.26876    | 5.58360 | 1.000 | -13.7333 | 16.2708 |
|                            |                       | Class 4 obesity       | -6.86765   | 4.41331 | 0.735 | -18.7254 | 4.9901  |
|                            | Class 4 obesity       | Normal body fat       | 20.49139*  | 4.56144 | 0.000 | 8.2357   | 32.7471 |
|                            |                       | Class 1 and 2 obesity | 8.13641    | 5.25455 | 0.746 | -5.9816  | 22.2544 |
|                            |                       | Class 3 obesity       | 6.86765    | 4.41331 | 0.735 | -4.9901  | 18.7254 |
| TCD8+CD28+ lymphocytes (%) | Normal body fat       | Class 1 and 2 obesity | -11.27207  | 5.49039 | 0.255 | -26.0366 | 3.4925  |
|                            |                       | Class 3 obesity       | -3.51827   | 5.42936 | 1.000 | -18.1187 | 11.0822 |
|                            |                       | Class 4 obesity       | -7.42521   | 4.93644 | 0.813 | -20.7001 | 5.8497  |
|                            | Class 1 and 2 obesity | Normal body fat       | 11.27207   | 5.49039 | 0.255 | -3.4925  | 26.0366 |
|                            |                       | Class 3 obesity       | 7.75380    | 5.59674 | 1.000 | -7.2967  | 22.8043 |
|                            |                       | Class 4 obesity       | 3.84686    | 5.11996 | 1.000 | -9.9215  | 17.6153 |
|                            | Class 3 obesity       | Normal body fat       | 3.51827    | 5.42936 | 1.000 | -11.0822 | 18.1187 |
|                            |                       | Class 1 and 2 obesity | -7.75380   | 5.59674 | 1.000 | -22.8043 | 7.2967  |
|                            |                       | Class 4 obesity       | -3.90694   | 5.05446 | 1.000 | -17.4992 | 9.6853  |
|                            | Class 4 obesity       | Normal body fat       | 7.42521    | 4.93644 | 0.813 | -5.8497  | 20.7001 |
|                            |                       | Class 1 and 2 obesity | -3.84686   | 5.11996 | 1.000 | -17.6153 | 9.9215  |
|                            |                       | Class 3 obesity       | 3.90694    | 5.05446 | 1.000 | -9.6853  | 17.4992 |
| TCD8+CD28- lymphocytes (%) | Normal body fat       | Class 1 and 2 obesity | 7.32937    | 5.80888 | 1.000 | -8.2780  | 22.9367 |
|                            |                       | Class 3 obesity       | 2.03146    | 5.37299 | 1.000 | -12.4047 | 16.4677 |
|                            |                       | Class 4 obesity       | 5.21902    | 5.16092 | 1.000 | -8.6474  | 19.0854 |
|                            | Class 1 and 2 obesity | Normal body fat       | -7.32937   | 5.80888 | 1.000 | -22.9367 | 8.2780  |
|                            |                       | Class 3 obesity       | -5.29791   | 5.62858 | 1.000 | -20.4208 | 9.8250  |
|                            |                       | Class 4 obesity       | -2.11035   | 5.42651 | 1.000 | -16.6904 | 12.4696 |
|                            | Class 3 obesity       | Normal body fat       | -2.03146   | 5.37299 | 1.000 | -16.4677 | 12.4047 |
|                            |                       | Class 1 and 2 obesity | 5.29791    | 5.62858 | 1.000 | -9.8250  | 20.4208 |
|                            |                       | Class 4 obesity       | 3.18756    | 4.95712 | 1.000 | -10.1313 | 16.5064 |
|                            | Class 4 obesity       | Normal body fat       | -5.21902   | 5.16092 | 1.000 | -19.0854 | 8.6474  |
|                            |                       | Class 1 and 2 obesity | 2.11035    | 5.42651 | 1.000 | -12.4696 | 16.6904 |
|                            |                       | Class 3 obesity       | -3.18756   | 4.95712 | 1.000 | -16.5064 | 10.1313 |

|                              |                       |                       |                       |          |         |          |         |        |
|------------------------------|-----------------------|-----------------------|-----------------------|----------|---------|----------|---------|--------|
| TCD8+CD45RA+ lymphocytes (%) | Normal body fat       | Class 1 and 2 obesity | -0.86667              | 5.24519  | 1.000   | -15.0173 | 13.2839 |        |
|                              |                       | Class 3 obesity       | 10.00505              | 5.00109  | 0.291   | -3.4870  | 23.4971 |        |
|                              |                       | Class 4 obesity       | 9.83611               | 4.54246  | 0.198   | -2.4187  | 22.0909 |        |
|                              | Class 1 and 2 obesity | Normal body fat       | 0.86667               | 5.24519  | 1.000   | -13.2839 | 15.0173 |        |
|                              |                       | Class 3 obesity       | 10.87172              | 5.00109  | 0.194   | -2.6203  | 24.3638 |        |
|                              |                       | Class 4 obesity       | 10.70278              | 4.54246  | 0.124   | -1.5520  | 22.9576 |        |
|                              | Class 3 obesity       | Normal body fat       | -10.00505             | 5.00109  | 0.291   | -23.4971 | 3.4870  |        |
|                              |                       | Class 1 and 2 obesity | -10.87172             | 5.00109  | 0.194   | -24.3638 | 2.6203  |        |
|                              |                       | Class 4 obesity       | -0.16894              | 4.25827  | 1.000   | -11.6570 | 11.3191 |        |
|                              | Class 4 obesity       | Normal body fat       | -9.83611              | 4.54246  | 0.198   | -22.0909 | 2.4187  |        |
|                              |                       | Class 1 and 2 obesity | -10.70278             | 4.54246  | 0.124   | -22.9576 | 1.5520  |        |
|                              |                       | Class 3 obesity       | 0.16894               | 4.25827  | 1.000   | -11.3191 | 11.6570 |        |
| TCD8+CD45RO+ lymphocytes (%) | Normal body fat       | Class 1 and 2 obesity | 0.67222               | 6.05175  | 1.000   | -15.6350 | 16.9794 |        |
|                              |                       | Class 3 obesity       | -7.81111              | 5.56680  | 0.983   | -22.8116 | 7.1893  |        |
|                              |                       | Class 4 obesity       | -13.74625             | 5.21730  | 0.059   | -27.8049 | 0.3124  |        |
|                              | Class 1 and 2 obesity | Normal body fat       | -0.67222              | 6.05175  | 1.000   | -16.9794 | 15.6350 |        |
|                              |                       | Class 3 obesity       | -8.48333              | 5.56680  | 0.785   | -23.4838 | 6.5171  |        |
|                              |                       | Class 4 obesity       | -14.41847*            | 5.21730  | 0.041   | -28.4772 | -0.3598 |        |
|                              | Class 3 obesity       | Normal body fat       | 7.81111               | 5.56680  | 0.983   | -7.1893  | 22.8116 |        |
|                              |                       | Class 1 and 2 obesity | 8.48333               | 5.56680  | 0.785   | -6.5171  | 23.4838 |        |
|                              |                       | Class 4 obesity       | -5.93514              | 4.64606  | 1.000   | -18.4545 | 6.5843  |        |
|                              | Class 4 obesity       | Normal body fat       | 13.74625              | 5.21730  | 0.059   | -0.3124  | 27.8049 |        |
|                              |                       | Class 1 and 2 obesity | 14.41847*             | 5.21730  | 0.041   | 0.3598   | 28.4772 |        |
|                              |                       | Class 3 obesity       | 5.93514               | 4.64606  | 1.000   | -6.5843  | 18.4545 |        |
|                              | NK lymphocytes (%)    | Normal body fat       | Class 1 and 2 obesity | 0.31464  | 0.16459 | 0.351    | -0.1273 | 0.7566 |
|                              |                       |                       | Class 3 obesity       | -0.01301 | 0.15151 | 1.000    | -0.4198 | 0.3938 |
|                              |                       |                       | Class 4 obesity       | 0.01702  | 0.13999 | 1.000    | -0.3589 | 0.3929 |
| Class 1 and 2 obesity        |                       | Normal body fat       | -0.31464              | 0.16459  | 0.351   | -0.7566  | 0.1273  |        |
|                              |                       | Class 3 obesity       | -0.32765              | 0.16074  | 0.263   | -0.7592  | 0.1039  |        |
|                              |                       | Class 4 obesity       | -0.29762              | 0.14993  | 0.297   | -0.7002  | 0.1049  |        |
| Class 3 obesity              |                       | Normal body fat       | 0.01301               | 0.15151  | 1.000   | -0.3938  | 0.4198  |        |
|                              |                       | Class 1 and 2 obesity | 0.32765               | 0.16074  | 0.263   | -0.1039  | 0.7592  |        |
|                              |                       | Class 4 obesity       | 0.03004               | 0.13544  | 1.000   | -0.3336  | 0.3937  |        |
| Class 4 obesity              |                       | Normal body fat       | -0.01702              | 0.13999  | 1.000   | -0.3929  | 0.3589  |        |
|                              |                       | Class 1 and 2 obesity | 0.29762               | 0.14993  | 0.297   | -0.1049  | 0.7002  |        |
|                              |                       | Class 3 obesity       | -0.03004              | 0.13544  | 1.000   | -0.3937  | 0.3336  |        |
| NKT lymphocytes (%)          |                       | Normal body fat       | Class 1 and 2 obesity | -0.09228 | 0.54816 | 1.000    | -1.5848 | 1.4002 |
|                              |                       |                       | Class 3 obesity       | 0.09878  | 0.36761 | 1.000    | -0.9021 | 1.0997 |
|                              |                       |                       | Class 4 obesity       | 0.05729  | 0.33319 | 1.000    | -0.8499 | 0.9645 |
|                              | Class 1 and 2 obesity | Normal body fat       | 0.09228               | 0.54816  | 1.000   | -1.4002  | 1.5848  |        |
|                              |                       | Class 3 obesity       | 0.19106               | 0.54086  | 1.000   | -1.2816  | 1.6637  |        |
|                              |                       | Class 4 obesity       | 0.14957               | 0.51808  | 1.000   | -1.2610  | 1.5602  |        |
|                              | Class 3 obesity       | Normal body fat       | -0.09878              | 0.36761  | 1.000   | -1.0997  | 0.9021  |        |
|                              |                       | Class 1 and 2 obesity | -0.19106              | 0.54086  | 1.000   | -1.6637  | 1.2816  |        |
|                              |                       | Class 4 obesity       | -0.04149              | 0.32104  | 1.000   | -0.9156  | 0.8326  |        |
|                              | Class 4 obesity       | Normal body fat       | -0.05729              | 0.33319  | 1.000   | -0.9645  | 0.8499  |        |
|                              |                       | Class 1 and 2 obesity | -0.14957              | 0.51808  | 1.000   | -1.5602  | 1.2610  |        |
|                              |                       | Class 3 obesity       | 0.04149               | 0.32104  | 1.000   | -0.8326  | 0.9156  |        |
|                              | TCD8+ lymphocytes (%) |                       | Class 1 and 2 obesity | -0.02402 | 0.00985 | 0.098    | -0.0505 | 0.0024 |

|                                     |                       |                       |            |           |            |            |           |
|-------------------------------------|-----------------------|-----------------------|------------|-----------|------------|------------|-----------|
|                                     | Normal body fat       | Class 3 obesity       | -0.02316   | 0.00929   | 0.085      | -0.0481    | 0.0018    |
|                                     |                       | Class 4 obesity       | -.03760*   | 0.00871   | 0.000      | -0.0610    | -0.0142   |
|                                     | Class 1 and 2 obesity | Normal body fat       | 0.02402    | 0.00985   | 0.098      | -0.0024    | 0.0505    |
|                                     |                       | Class 3 obesity       | 0.00086    | 0.00961   | 1.000      | -0.0249    | 0.0267    |
|                                     |                       | Class 4 obesity       | -0.01358   | 0.00905   | 0.816      | -0.0379    | 0.0107    |
|                                     | Class 3 obesity       | Normal body fat       | 0.02316    | 0.00929   | 0.085      | -0.0018    | 0.0481    |
|                                     |                       | Class 1 and 2 obesity | -0.00086   | 0.00961   | 1.000      | -0.0267    | 0.0249    |
|                                     |                       | Class 4 obesity       | -0.01444   | 0.00844   | 0.539      | -0.0371    | 0.0082    |
|                                     | Class 4 obesity       | Normal body fat       | .03760*    | 0.00871   | 0.000      | 0.0142     | 0.0610    |
| Class 1 and 2 obesity               |                       | 0.01358               | 0.00905    | 0.816     | -0.0107    | 0.0379     |           |
| Class 3 obesity                     |                       | 0.01444               | 0.00844    | 0.539     | -0.0082    | 0.0371     |           |
| TCD4+CD45RA+ lymphocytes (%)        | Normal body fat       | Class 1 and 2 obesity | -0.41148   | 0.20145   | 0.264      | -0.9547    | 0.1317    |
|                                     |                       | Class 3 obesity       | -0.02642   | 0.19208   | 1.000      | -0.5444    | 0.4915    |
|                                     |                       | Class 4 obesity       | -0.16185   | 0.17293   | 1.000      | -0.6281    | 0.3044    |
|                                     | Class 1 and 2 obesity | Normal body fat       | 0.41148    | 0.20145   | 0.264      | -0.1317    | 0.9547    |
|                                     |                       | Class 3 obesity       | 0.38506    | 0.19208   | 0.288      | -0.1329    | 0.9030    |
|                                     |                       | Class 4 obesity       | 0.24963    | 0.17293   | 0.914      | -0.2167    | 0.7159    |
|                                     | Class 3 obesity       | Normal body fat       | 0.02642    | 0.19208   | 1.000      | -0.4915    | 0.5444    |
|                                     |                       | Class 1 and 2 obesity | -0.38506   | 0.19208   | 0.288      | -0.9030    | 0.1329    |
|                                     |                       | Class 4 obesity       | -0.13543   | 0.16191   | 1.000      | -0.5720    | 0.3012    |
| Class 4 obesity                     | Normal body fat       | 0.16185               | 0.17293    | 1.000     | -0.3044    | 0.6281     |           |
|                                     | Class 1 and 2 obesity | -0.24963              | 0.17293    | 0.914     | -0.7159    | 0.2167     |           |
|                                     | Class 3 obesity       | 0.13543               | 0.16191    | 1.000     | -0.3012    | 0.5720     |           |
| TCD4+CD45RA+CD45RO+ lymphocytes (%) | Normal body fat       | Class 1 and 2 obesity | -0.22153   | 0.15638   | 0.959      | -0.6430    | 0.1999    |
|                                     |                       | Class 3 obesity       | -0.15115   | 0.14628   | 1.000      | -0.5454    | 0.2431    |
|                                     |                       | Class 4 obesity       | -0.16389   | 0.13424   | 1.000      | -0.5257    | 0.1979    |
|                                     | Class 1 and 2 obesity | Normal body fat       | 0.22153    | 0.15638   | 0.959      | -0.1999    | 0.6430    |
|                                     |                       | Class 3 obesity       | 0.07038    | 0.14628   | 1.000      | -0.3239    | 0.4646    |
|                                     |                       | Class 4 obesity       | 0.05765    | 0.13424   | 1.000      | -0.3041    | 0.4194    |
|                                     | Class 3 obesity       | Normal body fat       | 0.15115    | 0.14628   | 1.000      | -0.2431    | 0.5454    |
|                                     |                       | Class 1 and 2 obesity | -0.07038   | 0.14628   | 1.000      | -0.4646    | 0.3239    |
|                                     |                       | Class 4 obesity       | -0.01273   | 0.12232   | 1.000      | -0.3424    | 0.3169    |
| Class 4 obesity                     | Normal body fat       | 0.16389               | 0.13424    | 1.000     | -0.1979    | 0.5257     |           |
|                                     | Class 1 and 2 obesity | -0.05765              | 0.13424    | 1.000     | -0.4194    | 0.3041     |           |
|                                     | Class 3 obesity       | 0.01273               | 0.12232    | 1.000     | -0.3169    | 0.3424     |           |
| TCD4+CD45RO+ lymphocytes (%)        | Normal body fat       | Class 1 and 2 obesity | 1629.56667 | 822.35942 | 0.302      | -585.8929  | 3845.0262 |
|                                     |                       | Class 3 obesity       | -109.32231 | 756.46064 | 1.000      | -2147.2487 | 1928.6040 |
|                                     |                       | Class 4 obesity       | 402.72447  | 705.90928 | 1.000      | -1499.0151 | 2304.4640 |
|                                     | Class 1 and 2 obesity | Normal body fat       | -1629.5666 | 822.35942 | 0.302      | -3845.0262 | 585.8929  |
|                                     |                       | Class 3 obesity       | -1738.8889 | 756.46064 | 0.142      | -3776.8153 | 299.0374  |
|                                     |                       | Class 4 obesity       | -1226.8421 | 705.90928 | 0.513      | -3128.5817 | 674.8973  |
|                                     | Class 3 obesity       | Normal body fat       | 109.32231  | 756.46064 | 1.000      | -1928.6040 | 2147.2487 |
|                                     |                       | Class 1 and 2 obesity | 1738.88897 | 756.46064 | 0.142      | -299.0374  | 3776.8153 |
|                                     |                       | Class 4 obesity       | 512.04678  | 627.90572 | 1.000      | -1179.5490 | 2203.6425 |
| Class 4 obesity                     | Normal body fat       | -402.72447            | 705.90928  | 1.000     | -2304.4640 | 1499.0151  |           |
|                                     | Class 1 and 2 obesity | 1226.84219            | 705.90928  | 0.513     | -674.8973  | 3128.5817  |           |
|                                     | Class 3 obesity       | -512.04678            | 627.90572  | 1.000     | -2203.6425 | 1179.5490  |           |
| TCD8+CD45RA+CD45RO+ lymphocytes (%) | Normal body fat       | Class 1 and 2 obesity | 0.14472    | 0.17433   | 1.000      | -0.3251    | 0.6146    |
|                                     |                       | Class 3 obesity       | 0.06853    | 0.16078   | 1.000      | -0.3648    | 0.5019    |
|                                     |                       | Class 4 obesity       | 0.11346    | 0.15103   | 1.000      | -0.2936    | 0.5205    |

|                                                              |                       |                       |          |         |       |         |         |
|--------------------------------------------------------------|-----------------------|-----------------------|----------|---------|-------|---------|---------|
|                                                              | Class 1 and 2 obesity | Normal body fat       | -0.14472 | 0.17433 | 1.000 | -0.6146 | 0.3251  |
|                                                              |                       | Class 3 obesity       | -0.07619 | 0.15805 | 1.000 | -0.5022 | 0.3498  |
|                                                              |                       | Class 4 obesity       | -0.03127 | 0.14813 | 1.000 | -0.4305 | 0.3680  |
|                                                              | Class 3 obesity       | Normal body fat       | -0.06853 | 0.16078 | 1.000 | -0.5019 | 0.3648  |
|                                                              |                       | Class 1 and 2 obesity | 0.07619  | 0.15805 | 1.000 | -0.3498 | 0.5022  |
|                                                              |                       | Class 4 obesity       | 0.04493  | 0.13191 | 1.000 | -0.3106 | 0.4005  |
|                                                              | Class 4 obesity       | Normal body fat       | -0.11346 | 0.15103 | 1.000 | -0.5205 | 0.2936  |
|                                                              |                       | Class 1 and 2 obesity | 0.03127  | 0.14813 | 1.000 | -0.3680 | 0.4305  |
|                                                              |                       | Class 3 obesity       | -0.04493 | 0.13191 | 1.000 | -0.4005 | 0.3106  |
| TCD3+ lymphocytes (%)                                        | Normal body fat       | Class 1 and 2 obesity | -0.20717 | 0.38503 | 1.000 | -1.2401 | 0.8257  |
|                                                              |                       | Class 3 obesity       | -0.66830 | 0.36554 | 0.420 | -1.6489 | 0.3123  |
|                                                              |                       | Class 4 obesity       | -0.70151 | 0.34301 | 0.258 | -1.6217 | 0.2187  |
|                                                              | Class 1 and 2 obesity | Normal body fat       | 0.20717  | 0.38503 | 1.000 | -0.8257 | 1.2401  |
|                                                              |                       | Class 3 obesity       | -0.46112 | 0.36949 | 1.000 | -1.4524 | 0.5301  |
|                                                              |                       | Class 4 obesity       | -0.49433 | 0.34722 | 0.943 | -1.4258 | 0.4372  |
|                                                              | Class 3 obesity       | Normal body fat       | 0.66830  | 0.36554 | 0.420 | -0.3123 | 1.6489  |
|                                                              |                       | Class 1 and 2 obesity | 0.46112  | 0.36949 | 1.000 | -0.5301 | 1.4524  |
|                                                              |                       | Class 4 obesity       | -0.03321 | 0.32548 | 1.000 | -0.9064 | 0.8399  |
|                                                              | Class 4 obesity       | Normal body fat       | 0.70151  | 0.34301 | 0.258 | -0.2187 | 1.6217  |
|                                                              |                       | Class 1 and 2 obesity | 0.49433  | 0.34722 | 0.943 | -0.4372 | 1.4258  |
|                                                              |                       | Class 3 obesity       | 0.03321  | 0.32548 | 1.000 | -0.8399 | 0.9064  |
| B lymphocytes (%)                                            | Normal body fat       | Class 1 and 2 obesity | 0.18618  | 0.09589 | 0.327 | -0.0711 | 0.4434  |
|                                                              |                       | Class 3 obesity       | 0.20845  | 0.09104 | 0.143 | -0.0358 | 0.4527  |
|                                                              |                       | Class 4 obesity       | .25580*  | 0.08543 | 0.020 | 0.0266  | 0.4850  |
|                                                              | Class 1 and 2 obesity | Normal body fat       | -0.18618 | 0.09589 | 0.327 | -0.4434 | 0.0711  |
|                                                              |                       | Class 3 obesity       | 0.02227  | 0.09202 | 1.000 | -0.2246 | 0.2691  |
|                                                              |                       | Class 4 obesity       | 0.06963  | 0.08648 | 1.000 | -0.1624 | 0.3016  |
|                                                              | Class 3 obesity       | Normal body fat       | -0.20845 | 0.09104 | 0.143 | -0.4527 | 0.0358  |
|                                                              |                       | Class 1 and 2 obesity | -0.02227 | 0.09202 | 1.000 | -0.2691 | 0.2246  |
|                                                              |                       | Class 4 obesity       | 0.04736  | 0.08106 | 1.000 | -0.1701 | 0.2648  |
|                                                              | Class 4 obesity       | Normal body fat       | -.25580* | 0.08543 | 0.020 | -0.4850 | -0.0266 |
|                                                              |                       | Class 1 and 2 obesity | -0.06963 | 0.08648 | 1.000 | -0.3016 | 0.1624  |
|                                                              |                       | Class 3 obesity       | -0.04736 | 0.08106 | 1.000 | -0.2648 | 0.1701  |
| *. The difference in means is significant at the 0.05 level. |                       |                       |          |         |       |         |         |

Table 16S. Bonferroni test post hoc. Immune cells absolute values

| ANOVA, multiple comparisons |                       |                       |                           |             |       |                         |             |
|-----------------------------|-----------------------|-----------------------|---------------------------|-------------|-------|-------------------------|-------------|
|                             |                       |                       | difference of means (I-J) | Desv. Error | Sig.  | Confidence interval 95% |             |
|                             |                       |                       |                           |             |       | Lower limit             | Upper limit |
| Leukocytes (cel/ $\mu$ L)   | Normal body fat       | Class 1 and 2 obesity | -0.17189                  | 0.17737     | 1.000 | -0.6516                 | 0.3078      |
|                             |                       | Class 3 obesity       | -.39584*                  | 0.12086     | 0.009 | -0.7227                 | -0.0690     |
|                             |                       | Class 4 obesity       | -0.27259                  | 0.10679     | 0.075 | -0.5614                 | 0.0162      |
|                             | Class 1 and 2 obesity | Normal body fat       | 0.17189                   | 0.17737     | 1.000 | -0.3078                 | 0.6516      |
|                             |                       | Class 3 obesity       | -0.22395                  | 0.17417     | 1.000 | -0.6950                 | 0.2471      |
|                             |                       | Class 4 obesity       | -0.10070                  | 0.16472     | 1.000 | -0.5462                 | 0.3448      |
|                             |                       | Normal body fat       | .39584*                   | 0.12086     | 0.009 | 0.0690                  | 0.7227      |

|                                  |                                  |                       |                       |          |         |         |         |         |
|----------------------------------|----------------------------------|-----------------------|-----------------------|----------|---------|---------|---------|---------|
|                                  | Class 3 obesity                  | Class 1 and 2 obesity | 0.22395               | 0.17417  | 1.000   | -0.2471 | 0.6950  |         |
|                                  |                                  | Class 4 obesity       | 0.12325               | 0.10139  | 1.000   | -0.1510 | 0.3975  |         |
|                                  | Class 4 obesity                  | Normal body fat       | 0.27259               | 0.10679  | 0.075   | -0.0162 | 0.5614  |         |
|                                  |                                  | Class 1 and 2 obesity | 0.10070               | 0.16472  | 1.000   | -0.3448 | 0.5462  |         |
|                                  |                                  | Class 3 obesity       | -0.12325              | 0.10139  | 1.000   | -0.3975 | 0.1510  |         |
| Total lymphocytes (cel/ $\mu$ L) | Normal body fat                  | Class 1 and 2 obesity | -0.14725              | 0.23833  | 1.000   | -0.7917 | 0.4971  |         |
|                                  |                                  | Class 3 obesity       | -.72277*              | 0.16240  | 0.000   | -1.1619 | -0.2837 |         |
|                                  |                                  | Class 4 obesity       | -.55804*              | 0.14295  | 0.001   | -0.9446 | -0.1715 |         |
|                                  | Class 1 and 2 obesity            | Normal body fat       | 0.14725               | 0.23833  | 1.000   | -0.4971 | 0.7917  |         |
|                                  |                                  | Class 3 obesity       | -0.57552              | 0.23404  | 0.096   | -1.2083 | 0.0573  |         |
|                                  |                                  | Class 4 obesity       | -0.41079              | 0.22099  | 0.400   | -1.0083 | 0.1867  |         |
|                                  | Class 3 obesity                  | Normal body fat       | .72277*               | 0.16240  | 0.000   | 0.2837  | 1.1619  |         |
|                                  |                                  | Class 1 and 2 obesity | 0.57552               | 0.23404  | 0.096   | -0.0573 | 1.2083  |         |
|                                  |                                  | Class 4 obesity       | 0.16473               | 0.13567  | 1.000   | -0.2021 | 0.5316  |         |
|                                  | Class 4 obesity                  | Normal body fat       | .55804*               | 0.14295  | 0.001   | 0.1715  | 0.9446  |         |
|                                  |                                  | Class 1 and 2 obesity | 0.41079               | 0.22099  | 0.400   | -0.1867 | 1.0083  |         |
|                                  |                                  | Class 3 obesity       | -0.16473              | 0.13567  | 1.000   | -0.5316 | 0.2021  |         |
|                                  | Monocytes (cel/ $\mu$ L)         | Normal body fat       | Class 1 and 2 obesity | 0.00406  | 0.00595 | 1.000   | -0.0120 | 0.0202  |
|                                  |                                  |                       | Class 3 obesity       | 0.00762  | 0.00405 | 0.382   | -0.0033 | 0.0186  |
|                                  |                                  |                       | Class 4 obesity       | 0.00807  | 0.00357 | 0.158   | -0.0016 | 0.0177  |
| Class 1 and 2 obesity            |                                  | Normal body fat       | -0.00406              | 0.00595  | 1.000   | -0.0202 | 0.0120  |         |
|                                  |                                  | Class 3 obesity       | 0.00355               | 0.00584  | 1.000   | -0.0122 | 0.0194  |         |
|                                  |                                  | Class 4 obesity       | 0.00401               | 0.00552  | 1.000   | -0.0109 | 0.0189  |         |
| Class 3 obesity                  |                                  | Normal body fat       | -0.00762              | 0.00405  | 0.382   | -0.0186 | 0.0033  |         |
|                                  |                                  | Class 1 and 2 obesity | -0.00355              | 0.00584  | 1.000   | -0.0194 | 0.0122  |         |
|                                  |                                  | Class 4 obesity       | 0.00045               | 0.00339  | 1.000   | -0.0087 | 0.0096  |         |
| Class 4 obesity                  |                                  | Normal body fat       | -0.00807              | 0.00357  | 0.158   | -0.0177 | 0.0016  |         |
|                                  |                                  | Class 1 and 2 obesity | -0.00401              | 0.00552  | 1.000   | -0.0189 | 0.0109  |         |
|                                  |                                  | Class 3 obesity       | -0.00045              | 0.00339  | 1.000   | -0.0096 | 0.0087  |         |
| Granulocytes (cel/ $\mu$ L)      |                                  | Normal body fat       | Class 1 and 2 obesity | -0.16922 | 0.19376 | 1.000   | -0.6931 | 0.3547  |
|                                  |                                  |                       | Class 3 obesity       | -0.26558 | 0.13202 | 0.285   | -0.6225 | 0.0914  |
|                                  |                                  |                       | Class 4 obesity       | -0.17054 | 0.11621 | 0.876   | -0.4848 | 0.1437  |
|                                  | Class 1 and 2 obesity            | Normal body fat       | 0.16922               | 0.19376  | 1.000   | -0.3547 | 0.6931  |         |
|                                  |                                  | Class 3 obesity       | -0.09636              | 0.19027  | 1.000   | -0.6108 | 0.4181  |         |
|                                  |                                  | Class 4 obesity       | -0.00132              | 0.17966  | 1.000   | -0.4871 | 0.4844  |         |
|                                  | Class 3 obesity                  | Normal body fat       | 0.26558               | 0.13202  | 0.285   | -0.0914 | 0.6225  |         |
|                                  |                                  | Class 1 and 2 obesity | 0.09636               | 0.19027  | 1.000   | -0.4181 | 0.6108  |         |
|                                  |                                  | Class 4 obesity       | 0.09504               | 0.11030  | 1.000   | -0.2032 | 0.3933  |         |
|                                  | Class 4 obesity                  | Normal body fat       | 0.17054               | 0.11621  | 0.876   | -0.1437 | 0.4848  |         |
|                                  |                                  | Class 1 and 2 obesity | 0.00132               | 0.17966  | 1.000   | -0.4844 | 0.4871  |         |
|                                  |                                  | Class 3 obesity       | -0.09504              | 0.11030  | 1.000   | -0.3933 | 0.2032  |         |
|                                  | TCD3+ lymphocytes (cel/ $\mu$ L) | Normal body fat       | Class 1 and 2 obesity | -0.28845 | 0.27593 | 1.000   | -1.0347 | 0.4578  |
|                                  |                                  |                       | Class 3 obesity       | -.80586* | 0.18958 | 0.000   | -1.3186 | -0.2931 |
|                                  |                                  |                       | Class 4 obesity       | -.73160* | 0.16763 | 0.000   | -1.1850 | -0.2782 |
|                                  |                                  |                       |                       |          |         |         |         |         |

|                                |                       |                       |          |         |       |         |        |
|--------------------------------|-----------------------|-----------------------|----------|---------|-------|---------|--------|
|                                | Class 1 and 2 obesity | Normal body fat       | 0.28845  | 0.27593 | 1.000 | -0.4578 | 1.0347 |
|                                |                       | Class 3 obesity       | -0.51741 | 0.26899 | 0.348 | -1.2449 | 0.2101 |
|                                |                       | Class 4 obesity       | -0.44315 | 0.25399 | 0.509 | -1.1301 | 0.2438 |
|                                | Class 3 obesity       | Normal body fat       | .80586*  | 0.18958 | 0.000 | 0.2931  | 1.3186 |
|                                |                       | Class 1 and 2 obesity | 0.51741  | 0.26899 | 0.348 | -0.2101 | 1.2449 |
|                                |                       | Class 4 obesity       | 0.07426  | 0.15593 | 1.000 | -0.3475 | 0.4960 |
|                                | Class 4 obesity       | Normal body fat       | .73160*  | 0.16763 | 0.000 | 0.2782  | 1.1850 |
|                                |                       | Class 1 and 2 obesity | 0.44315  | 0.25399 | 0.509 | -0.2438 | 1.1301 |
|                                |                       | Class 3 obesity       | -0.07426 | 0.15593 | 1.000 | -0.4960 | 0.3475 |
| NK lymphocytes (cel/ $\mu$ L)  | Normal body fat       | Class 1 and 2 obesity | 0.27049  | 0.30818 | 1.000 | -0.5633 | 1.1043 |
|                                |                       | Class 3 obesity       | -0.50373 | 0.21503 | 0.130 | -1.0855 | 0.0780 |
|                                |                       | Class 4 obesity       | -0.13612 | 0.18485 | 1.000 | -0.6362 | 0.3640 |
|                                | Class 1 and 2 obesity | Normal body fat       | -0.27049 | 0.30818 | 1.000 | -1.1043 | 0.5633 |
|                                |                       | Class 3 obesity       | -0.77422 | 0.30615 | 0.080 | -1.6025 | 0.0540 |
|                                |                       | Class 4 obesity       | -0.40661 | 0.28576 | 0.952 | -1.1797 | 0.3665 |
|                                | Class 3 obesity       | Normal body fat       | 0.50373  | 0.21503 | 0.130 | -0.0780 | 1.0855 |
|                                |                       | Class 1 and 2 obesity | 0.77422  | 0.30615 | 0.080 | -0.0540 | 1.6025 |
|                                |                       | Class 4 obesity       | 0.36762  | 0.18144 | 0.276 | -0.1233 | 0.8585 |
|                                | Class 4 obesity       | Normal body fat       | 0.13612  | 0.18485 | 1.000 | -0.3640 | 0.6362 |
|                                |                       | Class 1 and 2 obesity | 0.40661  | 0.28576 | 0.952 | -0.3665 | 1.1797 |
|                                |                       | Class 3 obesity       | -0.36762 | 0.18144 | 0.276 | -0.8585 | 0.1233 |
| NKT lymphocytes (cel/ $\mu$ L) | Normal body fat       | Class 1 and 2 obesity | 0.02810  | 0.53439 | 1.000 | -1.4276 | 1.4838 |
|                                |                       | Class 3 obesity       | -0.32287 | 0.36178 | 1.000 | -1.3084 | 0.6627 |
|                                |                       | Class 4 obesity       | -0.15992 | 0.32912 | 1.000 | -1.0565 | 0.7366 |
|                                | Class 1 and 2 obesity | Normal body fat       | -0.02810 | 0.53439 | 1.000 | -1.4838 | 1.4276 |
|                                |                       | Class 3 obesity       | -0.35097 | 0.52314 | 1.000 | -1.7761 | 1.0741 |
|                                |                       | Class 4 obesity       | -0.18802 | 0.50110 | 1.000 | -1.5531 | 1.1770 |
|                                | Class 3 obesity       | Normal body fat       | 0.32287  | 0.36178 | 1.000 | -0.6627 | 1.3084 |
|                                |                       | Class 1 and 2 obesity | 0.35097  | 0.52314 | 1.000 | -1.0741 | 1.7761 |
|                                |                       | Class 4 obesity       | 0.16295  | 0.31052 | 1.000 | -0.6829 | 1.0088 |
|                                | Class 4 obesity       | Normal body fat       | 0.15992  | 0.32912 | 1.000 | -0.7366 | 1.0565 |
|                                |                       | Class 1 and 2 obesity | 0.18802  | 0.50110 | 1.000 | -1.1770 | 1.5531 |
|                                |                       | Class 3 obesity       | -0.16295 | 0.31052 | 1.000 | -1.0088 | 0.6829 |
| B lymphocytes (cel/ $\mu$ L)   | Normal body fat       | Class 1 and 2 obesity | -0.23695 | 0.33134 | 1.000 | -1.1336 | 0.6597 |
|                                |                       | Class 3 obesity       | -0.39724 | 0.21294 | 0.395 | -0.9735 | 0.1791 |
|                                |                       | Class 4 obesity       | -0.26960 | 0.18603 | 0.907 | -0.7730 | 0.2338 |
|                                | Class 1 and 2 obesity | Normal body fat       | 0.23695  | 0.33134 | 1.000 | -0.6597 | 1.1336 |
|                                |                       | Class 3 obesity       | -0.16029 | 0.32771 | 1.000 | -1.0472 | 0.7266 |
|                                |                       | Class 4 obesity       | -0.03265 | 0.31090 | 1.000 | -0.8740 | 0.8087 |
|                                | Class 3 obesity       | Normal body fat       | 0.39724  | 0.21294 | 0.395 | -0.1791 | 0.9735 |
|                                |                       | Class 1 and 2 obesity | 0.16029  | 0.32771 | 1.000 | -0.7266 | 1.0472 |
|                                |                       | Class 4 obesity       | 0.12764  | 0.17950 | 1.000 | -0.3581 | 0.6134 |

|                                              |                       |                       |            |         |       |          |         |
|----------------------------------------------|-----------------------|-----------------------|------------|---------|-------|----------|---------|
|                                              | Class 4 obesity       | Normal body fat       | 0.26960    | 0.18603 | 0.907 | -0.2338  | 0.7730  |
|                                              |                       | Class 1 and 2 obesity | 0.03265    | 0.31090 | 1.000 | -0.8087  | 0.8740  |
|                                              |                       | Class 3 obesity       | -0.12764   | 0.17950 | 1.000 | -0.6134  | 0.3581  |
| TCD4+ lymphocytes (cel/ $\mu$ L) (para cd62) | Normal body fat       | Class 1 and 2 obesity | -0.32581   | 0.24047 | 1.000 | -0.9760  | 0.3244  |
|                                              |                       | Class 3 obesity       | -.84717*   | 0.16385 | 0.000 | -1.2902  | -0.4042 |
|                                              |                       | Class 4 obesity       | -.79544*   | 0.14423 | 0.000 | -1.1854  | -0.4055 |
|                                              | Class 1 and 2 obesity | Normal body fat       | 0.32581    | 0.24047 | 1.000 | -0.3244  | 0.9760  |
|                                              |                       | Class 3 obesity       | -0.52136   | 0.23614 | 0.180 | -1.1598  | 0.1171  |
|                                              |                       | Class 4 obesity       | -0.46962   | 0.22297 | 0.229 | -1.0725  | 0.1332  |
|                                              | Class 3 obesity       | Normal body fat       | .84717*    | 0.16385 | 0.000 | 0.4042   | 1.2902  |
|                                              |                       | Class 1 and 2 obesity | 0.52136    | 0.23614 | 0.180 | -0.1171  | 1.1598  |
|                                              |                       | Class 4 obesity       | 0.05174    | 0.13689 | 1.000 | -0.3184  | 0.4218  |
|                                              | Class 4 obesity       | Normal body fat       | .79544*    | 0.14423 | 0.000 | 0.4055   | 1.1854  |
|                                              |                       | Class 1 and 2 obesity | 0.46962    | 0.22297 | 0.229 | -0.1332  | 1.0725  |
|                                              |                       | Class 3 obesity       | -0.05174   | 0.13689 | 1.000 | -0.4218  | 0.3184  |
| TCD4+CD62+ lymphocytes (cel/ $\mu$ L)        | Normal body fat       | Class 1 and 2 obesity | 2.22506    | 5.38931 | 1.000 | -12.3464 | 16.7965 |
|                                              |                       | Class 3 obesity       | -6.02866   | 3.67219 | 0.627 | -15.9574 | 3.9001  |
|                                              |                       | Class 4 obesity       | -3.66756   | 3.23249 | 1.000 | -12.4075 | 5.0724  |
|                                              | Class 1 and 2 obesity | Normal body fat       | -2.22506   | 5.38931 | 1.000 | -16.7965 | 12.3464 |
|                                              |                       | Class 3 obesity       | -8.25372   | 5.29220 | 0.736 | -22.5626 | 6.0552  |
|                                              |                       | Class 4 obesity       | -5.89262   | 4.99713 | 1.000 | -19.4037 | 7.6185  |
|                                              | Class 3 obesity       | Normal body fat       | 6.02866    | 3.67219 | 0.627 | -3.9001  | 15.9574 |
|                                              |                       | Class 1 and 2 obesity | 8.25372    | 5.29220 | 0.736 | -6.0552  | 22.5626 |
|                                              |                       | Class 4 obesity       | 2.36110    | 3.06785 | 1.000 | -5.9336  | 10.6559 |
|                                              | Class 4 obesity       | Normal body fat       | 3.66756    | 3.23249 | 1.000 | -5.0724  | 12.4075 |
|                                              |                       | Class 1 and 2 obesity | 5.89262    | 4.99713 | 1.000 | -7.6185  | 19.4037 |
|                                              |                       | Class 3 obesity       | -2.36110   | 3.06785 | 1.000 | -10.6559 | 5.9336  |
| TCD4+CD62- lymphocytes (cel/ $\mu$ L)        | Normal body fat       | Class 1 and 2 obesity | -7.37035   | 4.34202 | 0.560 | -19.1102 | 4.3695  |
|                                              |                       | Class 3 obesity       | -16.98818* | 2.95859 | 0.000 | -24.9875 | -8.9888 |
|                                              |                       | Class 4 obesity       | -15.26101* | 2.60433 | 0.000 | -22.3025 | -8.2195 |
|                                              | Class 1 and 2 obesity | Normal body fat       | 7.37035    | 4.34202 | 0.560 | -4.3695  | 19.1102 |
|                                              |                       | Class 3 obesity       | -9.61783   | 4.26378 | 0.161 | -21.1461 | 1.9105  |
|                                              |                       | Class 4 obesity       | -7.89066   | 4.02606 | 0.320 | -18.7762 | 2.9949  |
|                                              | Class 3 obesity       | Normal body fat       | 16.98818*  | 2.95859 | 0.000 | 8.9888   | 24.9875 |
|                                              |                       | Class 1 and 2 obesity | 9.61783    | 4.26378 | 0.161 | -1.9105  | 21.1461 |
|                                              |                       | Class 4 obesity       | 1.72717    | 2.47168 | 1.000 | -4.9557  | 8.4100  |
|                                              | Class 4 obesity       | Normal body fat       | 15.26101*  | 2.60433 | 0.000 | 8.2195   | 22.3025 |
|                                              |                       | Class 1 and 2 obesity | 7.89066    | 4.02606 | 0.320 | -2.9949  | 18.7762 |
|                                              |                       | Class 3 obesity       | -1.72717   | 2.47168 | 1.000 | -8.4100  | 4.9557  |
| TCD8+ lymphocytes (cel/ $\mu$ L)             | Normal body fat       | Class 1 and 2 obesity | -0.01038   | 0.00546 | 0.367 | -0.0252  | 0.0044  |
|                                              |                       | Class 3 obesity       | 0.00436    | 0.00381 | 1.000 | -0.0060  | 0.0147  |

|                                         |                       |                       |          |         |       |         |         |
|-----------------------------------------|-----------------------|-----------------------|----------|---------|-------|---------|---------|
|                                         |                       | Class 4 obesity       | -0.00211 | 0.00332 | 1.000 | -0.0111 | 0.0069  |
|                                         | Class 1 and 2 obesity | Normal body fat       | 0.01038  | 0.00546 | 0.367 | -0.0044 | 0.0252  |
|                                         |                       | Class 3 obesity       | .01474*  | 0.00543 | 0.049 | 0.0000  | 0.0294  |
|                                         |                       | Class 4 obesity       | 0.00827  | 0.00509 | 0.650 | -0.0055 | 0.0221  |
|                                         | Class 3 obesity       | Normal body fat       | -0.00436 | 0.00381 | 1.000 | -0.0147 | 0.0060  |
|                                         |                       | Class 1 and 2 obesity | -.01474* | 0.00543 | 0.049 | -0.0294 | 0.0000  |
|                                         |                       | Class 4 obesity       | -0.00647 | 0.00326 | 0.303 | -0.0153 | 0.0023  |
|                                         | Class 4 obesity       | Normal body fat       | 0.00211  | 0.00332 | 1.000 | -0.0069 | 0.0111  |
|                                         |                       | Class 1 and 2 obesity | -0.00827 | 0.00509 | 0.650 | -0.0221 | 0.0055  |
|                                         |                       | Class 3 obesity       | 0.00647  | 0.00326 | 0.303 | -0.0023 | 0.0153  |
| TCD8+CD28+ lymphocytes (cel/ $\mu$ L)   | Normal body fat       | Class 1 and 2 obesity | -0.54982 | 0.32411 | 0.565 | -1.4295 | 0.3299  |
|                                         |                       | Class 3 obesity       | -.98592* | 0.23624 | 0.001 | -1.6271 | -0.3447 |
|                                         |                       | Class 4 obesity       | -.87382* | 0.19942 | 0.000 | -1.4151 | -0.3326 |
|                                         | Class 1 and 2 obesity | Normal body fat       | 0.54982  | 0.32411 | 0.565 | -0.3299 | 1.4295  |
|                                         |                       | Class 3 obesity       | -0.43610 | 0.32914 | 1.000 | -1.3294 | 0.4572  |
|                                         |                       | Class 4 obesity       | -0.32400 | 0.30380 | 1.000 | -1.1486 | 0.5006  |
|                                         | Class 3 obesity       | Normal body fat       | .98592*  | 0.23624 | 0.001 | 0.3447  | 1.6271  |
|                                         |                       | Class 1 and 2 obesity | 0.43610  | 0.32914 | 1.000 | -0.4572 | 1.3294  |
|                                         |                       | Class 4 obesity       | 0.11210  | 0.20749 | 1.000 | -0.4511 | 0.6753  |
|                                         | Class 4 obesity       | Normal body fat       | .87382*  | 0.19942 | 0.000 | 0.3326  | 1.4151  |
|                                         |                       | Class 1 and 2 obesity | 0.32400  | 0.30380 | 1.000 | -0.5006 | 1.1486  |
|                                         |                       | Class 3 obesity       | -0.11210 | 0.20749 | 1.000 | -0.6753 | 0.4511  |
| TCD8+CD28- lymphocytes (cel/ $\mu$ L)   | Normal body fat       | Class 1 and 2 obesity | 0.02058  | 0.35791 | 1.000 | -0.9513 | 0.9924  |
|                                         |                       | Class 3 obesity       | -0.62321 | 0.26087 | 0.118 | -1.3316 | 0.0851  |
|                                         |                       | Class 4 obesity       | -0.49290 | 0.22132 | 0.175 | -1.0938 | 0.1080  |
|                                         | Class 1 and 2 obesity | Normal body fat       | -0.02058 | 0.35791 | 1.000 | -0.9924 | 0.9513  |
|                                         |                       | Class 3 obesity       | -0.64379 | 0.36346 | 0.485 | -1.6307 | 0.3431  |
|                                         |                       | Class 4 obesity       | -0.51348 | 0.33620 | 0.787 | -1.4264 | 0.3994  |
|                                         | Class 3 obesity       | Normal body fat       | 0.62321  | 0.26087 | 0.118 | -0.0851 | 1.3316  |
|                                         |                       | Class 1 and 2 obesity | 0.64379  | 0.36346 | 0.485 | -0.3431 | 1.6307  |
|                                         |                       | Class 4 obesity       | 0.13031  | 0.23018 | 1.000 | -0.4947 | 0.7553  |
|                                         | Class 4 obesity       | Normal body fat       | 0.49290  | 0.22132 | 0.175 | -0.1080 | 1.0938  |
|                                         |                       | Class 1 and 2 obesity | 0.51348  | 0.33620 | 0.787 | -0.3994 | 1.4264  |
|                                         |                       | Class 3 obesity       | -0.13031 | 0.23018 | 1.000 | -0.7553 | 0.4947  |
| TCD4+CD45RA+ lymphocytes (cel/ $\mu$ L) | Normal body fat       | Class 1 and 2 obesity | -0.53460 | 0.37261 | 0.933 | -1.5444 | 0.4752  |
|                                         |                       | Class 3 obesity       | -0.62366 | 0.26347 | 0.123 | -1.3377 | 0.0904  |
|                                         |                       | Class 4 obesity       | -.77599* | 0.22714 | 0.006 | -1.3916 | -0.1604 |
|                                         | Class 1 and 2 obesity | Normal body fat       | 0.53460  | 0.37261 | 0.933 | -0.4752 | 1.5444  |
|                                         |                       | Class 3 obesity       | -0.08906 | 0.37261 | 1.000 | -1.0988 | 0.9207  |
|                                         |                       | Class 4 obesity       | -0.24139 | 0.34787 | 1.000 | -1.1841 | 0.7013  |
|                                         | Class 3 obesity       | Normal body fat       | 0.62366  | 0.26347 | 0.123 | -0.0904 | 1.3377  |
|                                         |                       | Class 1 and 2 obesity | 0.08906  | 0.37261 | 1.000 | -0.9207 | 1.0988  |

|                                                |                                                |                       |                       |          |         |         |         |         |
|------------------------------------------------|------------------------------------------------|-----------------------|-----------------------|----------|---------|---------|---------|---------|
|                                                |                                                | Class 4 obesity       | -0.15232              | 0.22714  | 1.000   | -0.7679 | 0.4632  |         |
|                                                | Class 4 obesity                                | Normal body fat       | .77599*               | 0.22714  | 0.006   | 0.1604  | 1.3916  |         |
|                                                |                                                | Class 1 and 2 obesity | 0.24139               | 0.34787  | 1.000   | -0.7013 | 1.1841  |         |
|                                                |                                                | Class 3 obesity       | 0.15232               | 0.22714  | 1.000   | -0.4632 | 0.7679  |         |
| TCD4+CD45RA+CD45RO+ lymphocytes (cel/ $\mu$ L) | Normal body fat                                | Class 1 and 2 obesity | -0.00238              | 0.01108  | 1.000   | -0.0324 | 0.0277  |         |
|                                                |                                                | Class 3 obesity       | .02623*               | 0.00784  | 0.008   | 0.0050  | 0.0475  |         |
|                                                |                                                | Class 4 obesity       | .03050*               | 0.00676  | 0.000   | 0.0122  | 0.0488  |         |
|                                                | Class 1 and 2 obesity                          | Normal body fat       | 0.00238               | 0.01108  | 1.000   | -0.0277 | 0.0324  |         |
|                                                |                                                | Class 3 obesity       | 0.02861               | 0.01108  | 0.071   | -0.0014 | 0.0587  |         |
|                                                |                                                | Class 4 obesity       | .03288*               | 0.01035  | 0.013   | 0.0048  | 0.0609  |         |
|                                                | Class 3 obesity                                | Normal body fat       | -.02623*              | 0.00784  | 0.008   | -0.0475 | -0.0050 |         |
|                                                |                                                | Class 1 and 2 obesity | -0.02861              | 0.01108  | 0.071   | -0.0587 | 0.0014  |         |
|                                                |                                                | Class 4 obesity       | 0.00427               | 0.00676  | 1.000   | -0.0140 | 0.0226  |         |
|                                                | Class 4 obesity                                | Normal body fat       | -.03050*              | 0.00676  | 0.000   | -0.0488 | -0.0122 |         |
|                                                |                                                | Class 1 and 2 obesity | -.03288*              | 0.01035  | 0.013   | -0.0609 | -0.0048 |         |
|                                                |                                                | Class 3 obesity       | -0.00427              | 0.00676  | 1.000   | -0.0226 | 0.0140  |         |
|                                                | TCD4+CD45RO+ lymphocytes (cel/ $\mu$ L)        | Normal body fat       | Class 1 and 2 obesity | 0.05692  | 0.27846 | 1.000   | -0.6975 | 0.8113  |
|                                                |                                                |                       | Class 3 obesity       | -.78441* | 0.19690 | 0.001   | -1.3178 | -0.2510 |
|                                                |                                                |                       | Class 4 obesity       | -.48322* | 0.16902 | 0.033   | -0.9411 | -0.0253 |
| Class 1 and 2 obesity                          |                                                | Normal body fat       | -0.05692              | 0.27846  | 1.000   | -0.8113 | 0.6975  |         |
|                                                |                                                | Class 3 obesity       | -.84132*              | 0.27846  | 0.021   | -1.5957 | -0.0870 |         |
|                                                |                                                | Class 4 obesity       | -0.54014              | 0.25950  | 0.245   | -1.2431 | 0.1629  |         |
| Class 3 obesity                                |                                                | Normal body fat       | .78441*               | 0.19690  | 0.001   | 0.2510  | 1.3178  |         |
|                                                |                                                | Class 1 and 2 obesity | .84132*               | 0.27846  | 0.021   | 0.0870  | 1.5957  |         |
|                                                |                                                | Class 4 obesity       | 0.30119               | 0.16902  | 0.472   | -0.1567 | 0.7591  |         |
| Class 4 obesity                                |                                                | Normal body fat       | .48322*               | 0.16902  | 0.033   | 0.0253  | 0.9411  |         |
|                                                |                                                | Class 1 and 2 obesity | 0.54014               | 0.25950  | 0.245   | -0.1629 | 1.2431  |         |
|                                                |                                                | Class 3 obesity       | -0.30119              | 0.16902  | 0.472   | -0.7591 | 0.1567  |         |
| TCD8+CD45RA+ lymphocytes (cel/ $\mu$ L)        |                                                | Normal body fat       | Class 1 and 2 obesity | 0.13030  | 0.31536 | 1.000   | -0.7253 | 0.9859  |
|                                                |                                                |                       | Class 3 obesity       | -0.34252 | 0.22299 | 0.773   | -0.9475 | 0.2625  |
|                                                |                                                |                       | Class 4 obesity       | -0.31086 | 0.19500 | 0.692   | -0.8399 | 0.2182  |
|                                                | Class 1 and 2 obesity                          | Normal body fat       | -0.13030              | 0.31536  | 1.000   | -0.9859 | 0.7253  |         |
|                                                |                                                | Class 3 obesity       | -0.47283              | 0.31536  | 0.829   | -1.3284 | 0.3828  |         |
|                                                |                                                | Class 4 obesity       | -0.44116              | 0.29622  | 0.845   | -1.2448 | 0.3625  |         |
|                                                | Class 3 obesity                                | Normal body fat       | 0.34252               | 0.22299  | 0.773   | -0.2625 | 0.9475  |         |
|                                                |                                                | Class 1 and 2 obesity | 0.47283               | 0.31536  | 0.829   | -0.3828 | 1.3284  |         |
|                                                |                                                | Class 4 obesity       | 0.03167               | 0.19500  | 1.000   | -0.4974 | 0.5607  |         |
|                                                | Class 4 obesity                                | Normal body fat       | 0.31086               | 0.19500  | 0.692   | -0.2182 | 0.8399  |         |
|                                                |                                                | Class 1 and 2 obesity | 0.44116               | 0.29622  | 0.845   | -0.3625 | 1.2448  |         |
|                                                |                                                | Class 3 obesity       | -0.03167              | 0.19500  | 1.000   | -0.5607 | 0.4974  |         |
|                                                | TCD8+CD45RA+CD45RO+ lymphocytes (cel/ $\mu$ L) | Normal body fat       | Class 1 and 2 obesity | -0.00580 | 0.01132 | 1.000   | -0.0365 | 0.0249  |

|                                                              |                                         |                       |                       |          |         |         |         |
|--------------------------------------------------------------|-----------------------------------------|-----------------------|-----------------------|----------|---------|---------|---------|
|                                                              |                                         | Class 3 obesity       | 0.01350               | 0.00806  | 0.589   | -0.0084 | 0.0354  |
|                                                              |                                         | Class 4 obesity       | 0.01678               | 0.00705  | 0.119   | -0.0023 | 0.0359  |
|                                                              | Class 1 and 2 obesity                   | Normal body fat       | 0.00580               | 0.01132  | 1.000   | -0.0249 | 0.0365  |
|                                                              |                                         | Class 3 obesity       | 0.01930               | 0.01124  | 0.541   | -0.0112 | 0.0498  |
|                                                              |                                         | Class 4 obesity       | 0.02257               | 0.01053  | 0.213   | -0.0060 | 0.0511  |
|                                                              | Class 3 obesity                         | Normal body fat       | -0.01350              | 0.00806  | 0.589   | -0.0354 | 0.0084  |
|                                                              |                                         | Class 1 and 2 obesity | -0.01930              | 0.01124  | 0.541   | -0.0498 | 0.0112  |
|                                                              |                                         | Class 4 obesity       | 0.00327               | 0.00691  | 1.000   | -0.0155 | 0.0220  |
|                                                              | Class 4 obesity                         | Normal body fat       | -0.01678              | 0.00705  | 0.119   | -0.0359 | 0.0023  |
|                                                              |                                         | Class 1 and 2 obesity | -0.02257              | 0.01053  | 0.213   | -0.0511 | 0.0060  |
|                                                              |                                         | Class 3 obesity       | -0.00327              | 0.00691  | 1.000   | -0.0220 | 0.0155  |
|                                                              | TCD8+CD45RO+ lymphocytes (cel/ $\mu$ L) | Normal body fat       | Class 1 and 2 obesity | -0.42756 | 0.27498 | 0.746   | -1.1733 |
| Class 3 obesity                                              |                                         |                       | -1.06312*             | 0.19444  | 0.000   | -1.5905 | -0.5358 |
| Class 4 obesity                                              |                                         |                       | -.93751*              | 0.16919  | 0.000   | -1.3964 | -0.4787 |
| Class 1 and 2 obesity                                        |                                         | Normal body fat       | 0.42756               | 0.27498  | 0.746   | -0.3182 | 1.1733  |
|                                                              |                                         | Class 3 obesity       | -0.63556              | 0.27498  | 0.142   | -1.3813 | 0.1102  |
|                                                              |                                         | Class 4 obesity       | -0.50995              | 0.25775  | 0.310   | -1.2090 | 0.1891  |
| Class 3 obesity                                              |                                         | Normal body fat       | 1.06312*              | 0.19444  | 0.000   | 0.5358  | 1.5905  |
|                                                              |                                         | Class 1 and 2 obesity | 0.63556               | 0.27498  | 0.142   | -0.1102 | 1.3813  |
|                                                              |                                         | Class 4 obesity       | 0.12561               | 0.16919  | 1.000   | -0.3332 | 0.5845  |
| Class 4 obesity                                              |                                         | Normal body fat       | .93751*               | 0.16919  | 0.000   | 0.4787  | 1.3964  |
|                                                              |                                         | Class 1 and 2 obesity | 0.50995               | 0.25775  | 0.310   | -0.1891 | 1.2090  |
|                                                              |                                         | Class 3 obesity       | -0.12561              | 0.16919  | 1.000   | -0.5845 | 0.3332  |
| *. The difference in means is significant at the 0.05 level. |                                         |                       |                       |          |         |         |         |

- 9- To determine relationships between lymphocyte subpopulations and metabolic variables, we utilized a Pearson correlation matrix and identified correlations greater than  $\pm 0.6$ . We considered  $p < 0.05$  to indicate a statistically significant difference. We used the Python Environment v3.6.7 statistical package (CreateSpace 2009, USA). (Table 17S)

| Var X                    | Var y                                   | r value  | p value  |
|--------------------------|-----------------------------------------|----------|----------|
| TBF (%)                  | BMI (kg/m <sup>2</sup> )                | 0.879970 | 8.31E-30 |
| BMI (kg/m <sup>2</sup> ) | TCD8+CD45RO+ lymphocytes (cel/ $\mu$ L) | 0.686432 | 3.15E-08 |
| WC (cm)                  | TCD8+CD45RO+ lymphocytes (cel/ $\mu$ L) | 0.673646 | 5.28E-08 |
| Weight (kg)              | TCD8+CD45RO+ lymphocytes (cel/ $\mu$ L) | 0.519938 | 1.26E-06 |
| TBF (%)                  | TCD8+CD45RO+ lymphocytes (cel/ $\mu$ L) | 0.50041  | 3.58E-06 |
| BMI (kg/m <sup>2</sup> ) | TCD4+CD62- lymphocytes (cel/ $\mu$ L)   | 0.526419 | 1.93E-07 |
| CRP (mg/dL)              | TCD4+ lymphocytes (cel/ $\mu$ L)        | 0.528084 | 2.44E-07 |
| Weight (kg)              | Total lymphocytes (cel/ $\mu$ L)        | 0.413708 | 7.52E-05 |
| Weight (kg)              | TCD4+ lymphocytes (cel/ $\mu$ L)        | 0.407462 | 9.87E-05 |
| Weight (kg)              | TCD4+CD62- lymphocytes (cel/ $\mu$ L)   | 0.446095 | 1.67E-05 |
| Weight (kg)              | TCD4+CD45RO+ lymphocytes (cel/ $\mu$ L) | 0.407349 | 0.000177 |
| Weight (kg)              | TCD8+CD45RO+ lymphocytes (cel/ $\mu$ L) | 0.419938 | 1.26E-06 |
| WC (cm)                  | TCD8+CD45RO+ lymphocytes (%)            | 0.422778 | 1.3E-05  |
| WC (cm)                  | Leukocytes (cel/ $\mu$ L)               | 0.400363 | 0.000147 |

|             |                                                  |          |          |
|-------------|--------------------------------------------------|----------|----------|
| WC (cm)     | Total lymphocytes (cel/ $\mu$ L)                 | 0.451846 | 1.26E-05 |
| WC (cm)     | TCD3+ lymphocytes (cel/ $\mu$ L)                 | 0.444684 | 2.01E-05 |
| WC (cm)     | TCD4+CD62- lymphocytes (cel/ $\mu$ L)            | 0.481465 | 2.69E-06 |
| TBF (%)     | TCD8+ lymphocytes (%)                            | 0.402567 | 6.81E-06 |
| TBF (%)     | TCD4+ lymphocytes (cel/ $\mu$ L)                 | 0.443611 | 1.89E-05 |
| TBF (%)     | TCD4+CD62- lymphocytes (cel/ $\mu$ L)            | 0.457679 | 9.4E-06  |
| TBF (%)     | TCD8+CD45RO+ lymphocytes (cel/ $\mu$ L)          | 0.50041  | 3.58E-06 |
| BMI (kg/m2) | Total lymphocytes (cel/ $\mu$ L)                 | 0.418067 | 6.19E-05 |
| BMI (kg/m2) | TCD3+ lymphocytes (cel/ $\mu$ L)                 | 0.419928 | 6.31E-05 |
| BMI (kg/m2) | TCD4+ lymphocytes (cel/ $\mu$ L)                 | 0.495786 | 1.21E-06 |
| BMI (kg/m2) | TCD4+CD62- lymphocytes (cel/ $\mu$ L)            | 0.526419 | 1.93E-07 |
| BMI (kg/m2) | TCD4+CD45RA+CD45RO+ lymphocytes (cel/ $\mu$ L)   | -0.43527 | 6.1E-05  |
| BMI (kg/m2) | TCD3+ lymphocytes (cel/ $\mu$ L) (para raro cd8) | 0.450166 | 1.54E-05 |

Table 17.2S. Correlation between immunological variables and the metabolic and clinical variables of the class 1 and 2 obesity

| Var X           | Var y                        | r value  | p value  |
|-----------------|------------------------------|----------|----------|
| FFM (%)         | TCD4+CD45RO+ lymphocytes (%) | 0.769907 | 0.000192 |
| FFM (%)         | TCD4+CD45RA+ lymphocytes (%) | -0.70408 | 0.001109 |
| Age (years)     | TCD3 lymphocytes (%)         | 0.70156  | 0.014328 |
| FFM (%)         | TCD4+CD45RO+ lymphocytes (%) | 0.568907 | 0.000192 |
| FFM (%)         | Monocytes (%)                | 0.551761 | 0.006344 |
| LDL-c (mg/dL)   | Age (years)                  | 0.405323 | 0.044423 |
| Age (years)     | NK lymphocytes (%)           | 0.477629 | 0.028544 |
| FFM (kg)        | TCD4+CD45RO+ lymphocytes (%) | -0.47217 | 0.013092 |
| Glucose (mg/dL) | TCD4+CD45RO+ lymphocytes (%) | -0.40020 | 0.034515 |
| HDL-c (mg/dL)   | TCD8+ lymphocytes (%)        | 0.423193 | 0.044213 |

Table 17.3S. Correlation between immunological variables and the metabolic and clinical variables of the 3 obesity

| Var X                     | Var y                                          | r value  | p value  |
|---------------------------|------------------------------------------------|----------|----------|
| CRP (mg/dL)               | Granulocytes (cel/ $\mu$ L)                    | 0.762016 | 0.002708 |
| CRP (mg/dL)               | Leukocytes (cel/ $\mu$ L)                      | 0.725194 | 0.000200 |
| VF (cm <sup>2</sup> )     | Leukocytes (cel/ $\mu$ L)                      | 0.727146 | 0.007743 |
| VF (cm <sup>2</sup> )     | TCD8+CD45RA+CD45RO+ lymphocytes (cel/ $\mu$ L) | -0.61231 | 0.008895 |
| FFM (%)                   | TCD4+CD45RA+ lymphocytes (%)                   | -0.42960 | 0.046004 |
| FFM (%)                   | Leukocytes (cel/ $\mu$ L)                      | 0.534213 | 0.012609 |
| FFM (%)                   | Total lymphocytes (cel/ $\mu$ L)               | 0.456551 | 0.037486 |
| FFM (%)                   | TCD3+ lymphocytes (cel/ $\mu$ L)               | 0.446847 | 0.042275 |
| Total cholesterol (mg/dL) | TCD8+CD45RO+ lymphocytes (%)                   | 0.450067 | 0.021051 |
| Total cholesterol (mg/dL) | Age (years)                                    | 0.456780 | 0.009790 |
| Total cholesterol (mg/dL) | TCD8+ lymphocytes (%)                          | 0.402137 | 0.030576 |
| Age (years)               | TCD4+CD45RA+CD45RO+ lymphocytes (%)            | 0.426000 | 0.037928 |
| Age (years)               | TCD4+CD45RA+CD45RO+ lymphocytes (cel/ $\mu$ L) | -0.48861 | 0.039636 |
| BMI (kg/m2)               | NK lymphocytes (%)                             | 0.437265 | 0.017693 |

|                          |                                     |          |          |
|--------------------------|-------------------------------------|----------|----------|
| BMI (kg/m <sup>2</sup> ) | TCD4+CD45RA+CD45RO+ lymphocytes (%) | -0.49843 | 0.013175 |
| Glucose (mg/dL)          | TCD4+CD45RA+ lymphocytes (%)        | 0.452482 | 0.034478 |
| Glucose (mg/dL)          | Granulocytes (cel/ $\mu$ L)         | -0.47543 | 0.029390 |
| CRP (mg/dL)              | TCD4+ lymphocytes (cel/ $\mu$ L)    | 0.470103 | 0.031519 |

| Table 17.4S. Correlation between immunological variables and the metabolic and clinical variables of the 3 obesity |                                       |          |          |
|--------------------------------------------------------------------------------------------------------------------|---------------------------------------|----------|----------|
| Var X                                                                                                              | Var y                                 | r value  | p value  |
| TBF (%)                                                                                                            | TCD4+CD45RO+ lymphocytes (%)          | 0.646581 | 0.002548 |
| Age (years)                                                                                                        | TCD8+CD28- lymphocytes (cel/ $\mu$ L) | -0.62224 | 0.001534 |
| LDL-c (mg/dL)                                                                                                      | Age (years)                           | 0.461274 | 0.002108 |
| Age (years)                                                                                                        | TCD8+ lymphocytes (cel/ $\mu$ L)      | 0.407478 | 0.01111  |
|                                                                                                                    |                                       |          |          |
| Age (years)                                                                                                        | TCD8+ lymphocytes (cel/ $\mu$ L)      | 0.413918 | 0.008807 |
| CRP (mg/dL)                                                                                                        | TCD3+ lymphocytes (cel/ $\mu$ L)      | 0.456071 | 0.003523 |
